# Supplementary material for: Synthesis of two distinct pyrrole moiety-containing arenes from nitroanilines using Paal–Knorr followed by an indium-mediated reaction
Source: Royal Society of Chemistry journal article supplement (doi:10.1039/c5ob02101d), 2015-11-12

<sup>1</sup>H NMR of unsymmetrical  
((1*H*-pyrrol-1-yl)phenyl)-1*H*-pyrrole derivatives

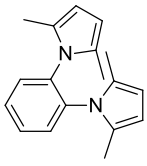

2,5-Dimethyl-1-(2-(2,5-dimethyl-1H-pyrrol-1-yl)phenyl)-1H-pyrrole (1)

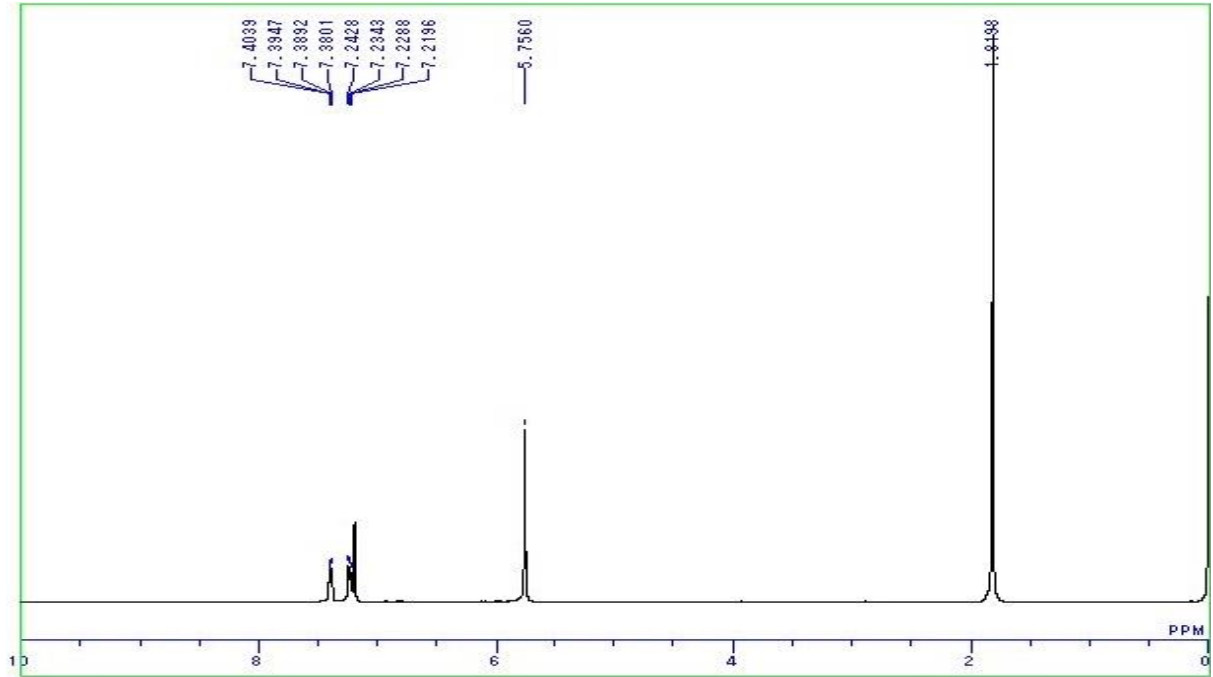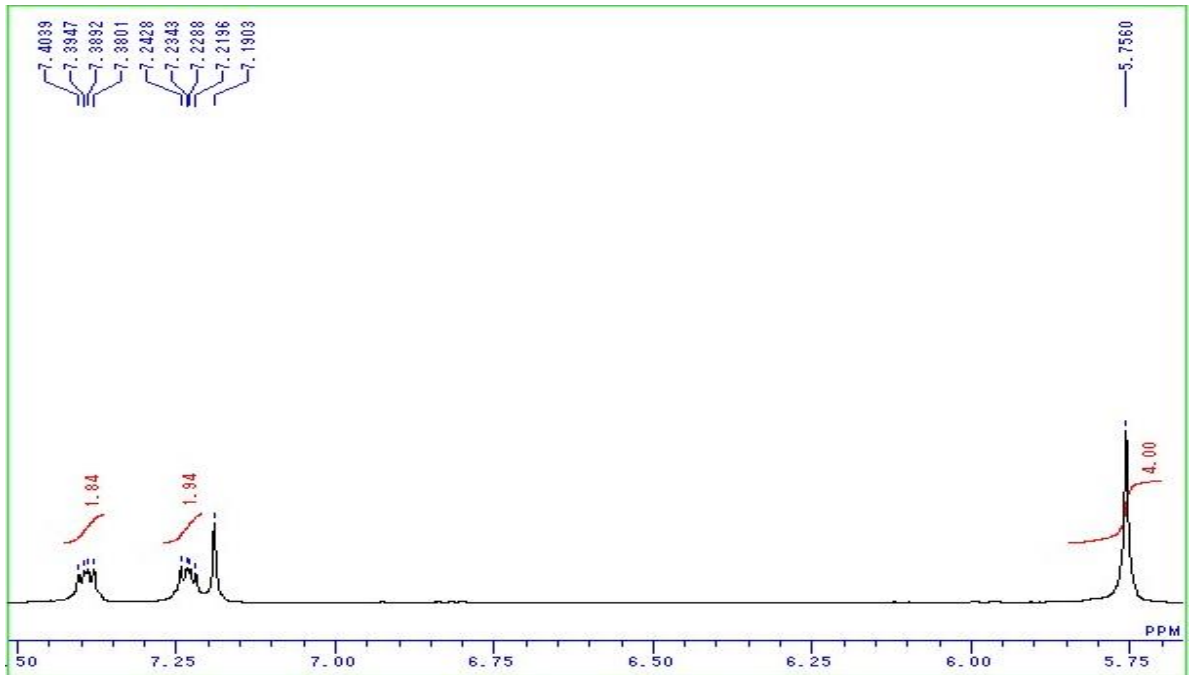

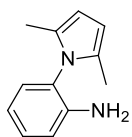

2-(2,5-dimethyl-1H-pyrrol-1-yl)benzeneamine (1')

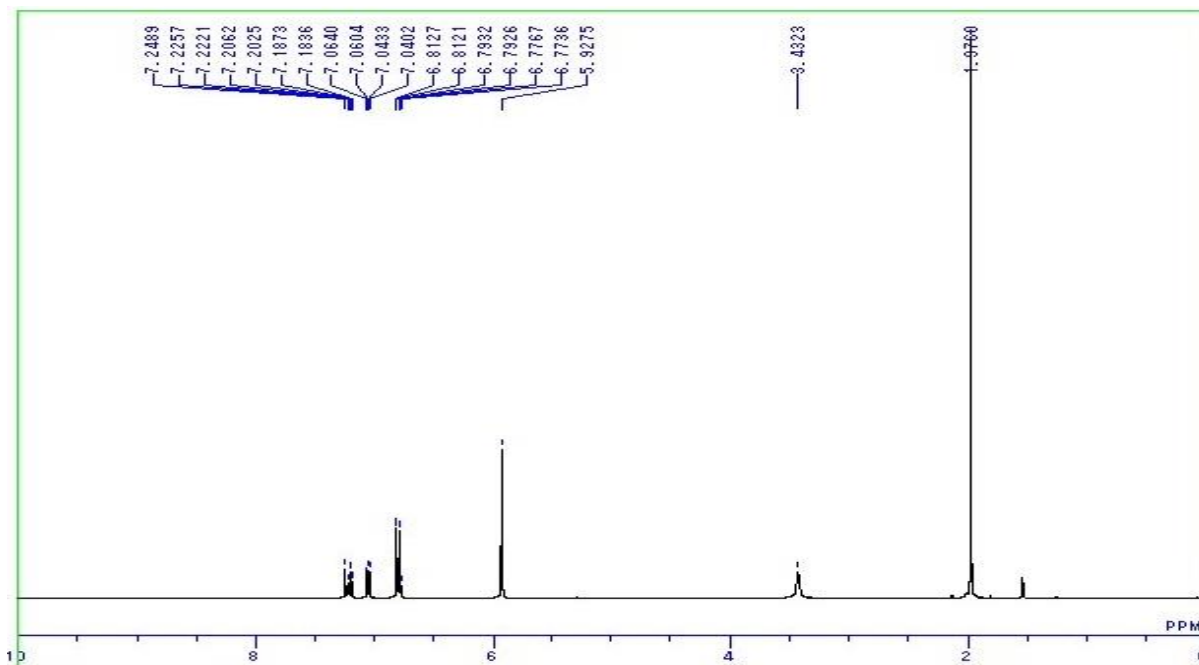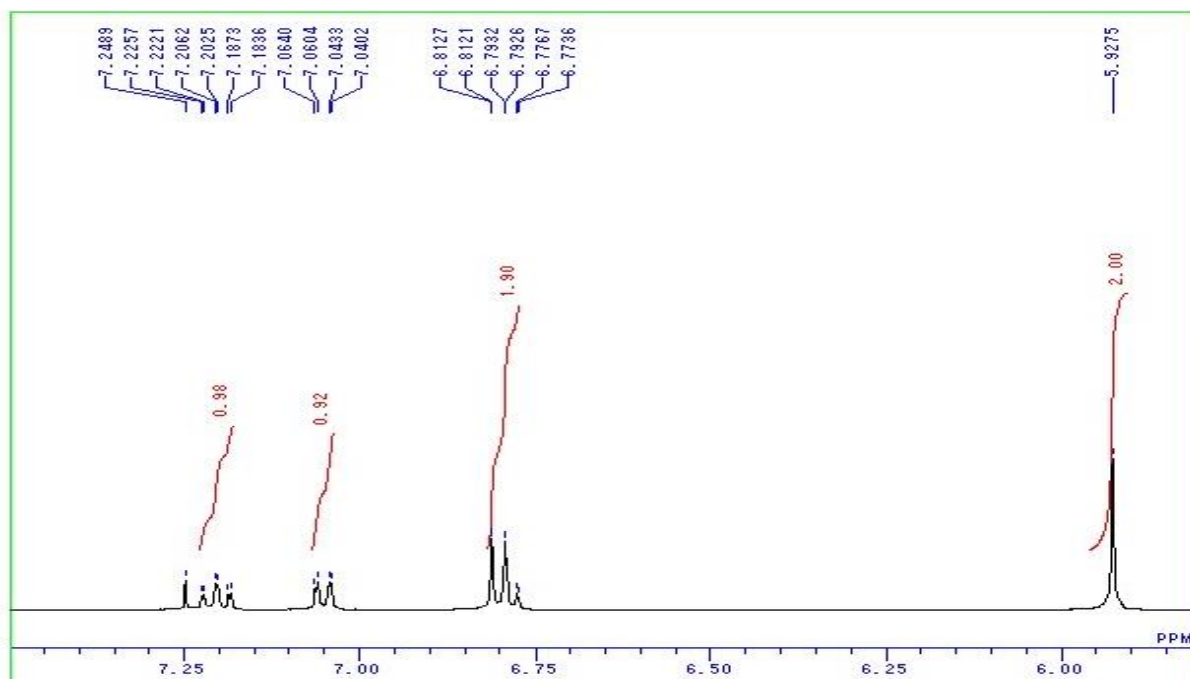

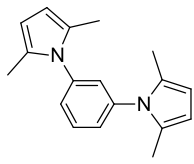

2,5-Dimethyl-1-(3-(2,5-dimethyl-1H-pyrrol-1-yl)phenyl)-1H-pyrrole (2)

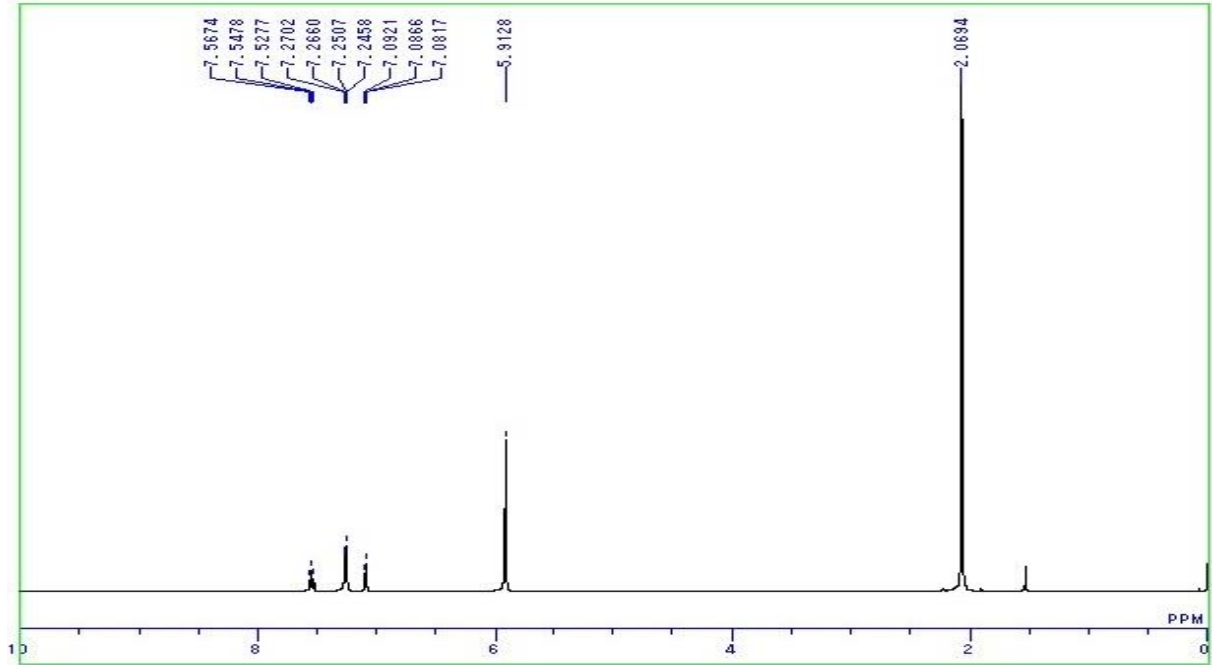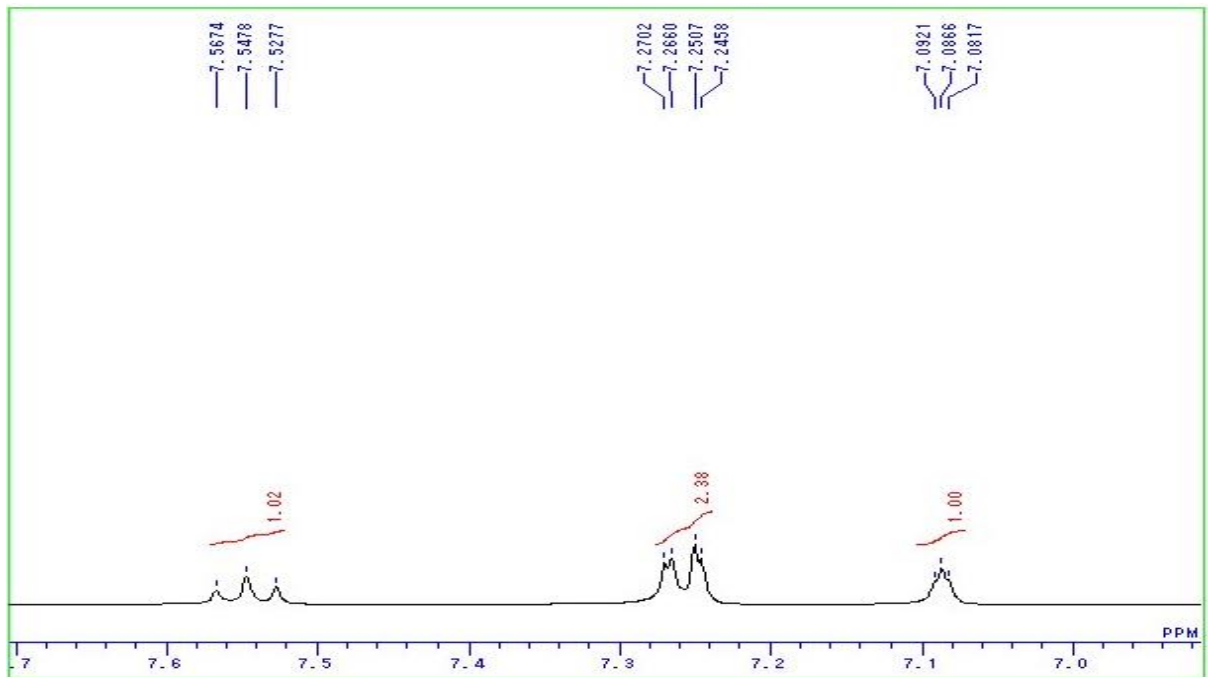

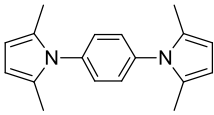

2,5-Dimethyl-1-(4-(2,5-dimethyl-1H-pyrrol-1-yl)phenyl)-1H-pyrrole (3)

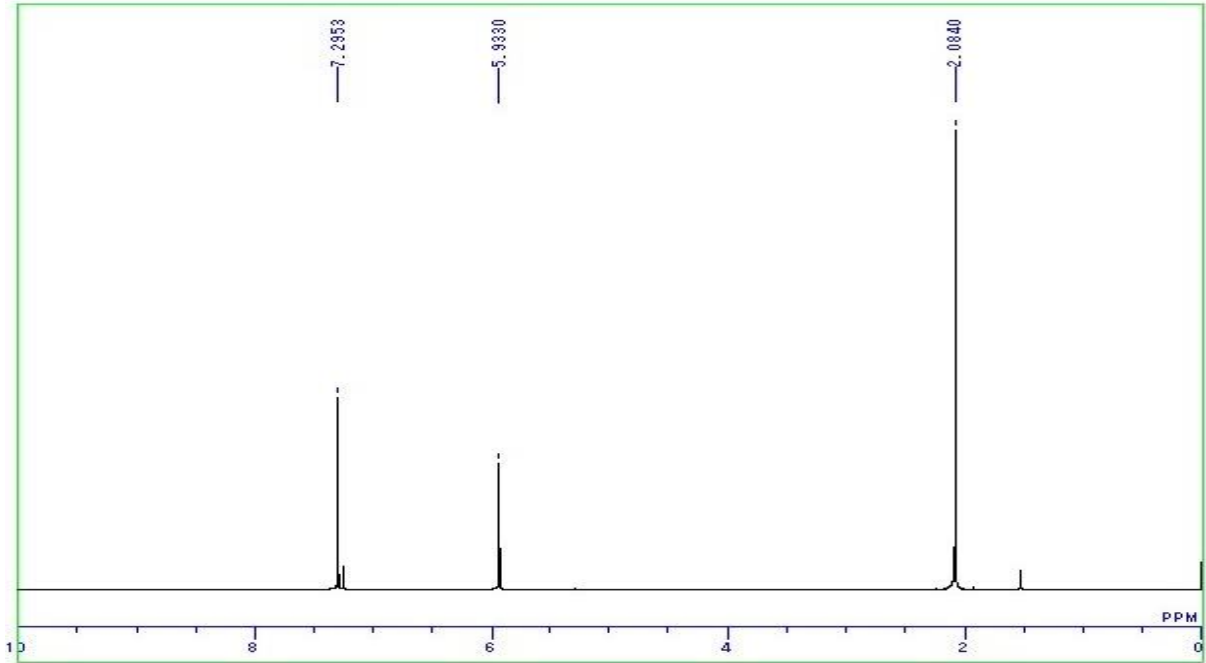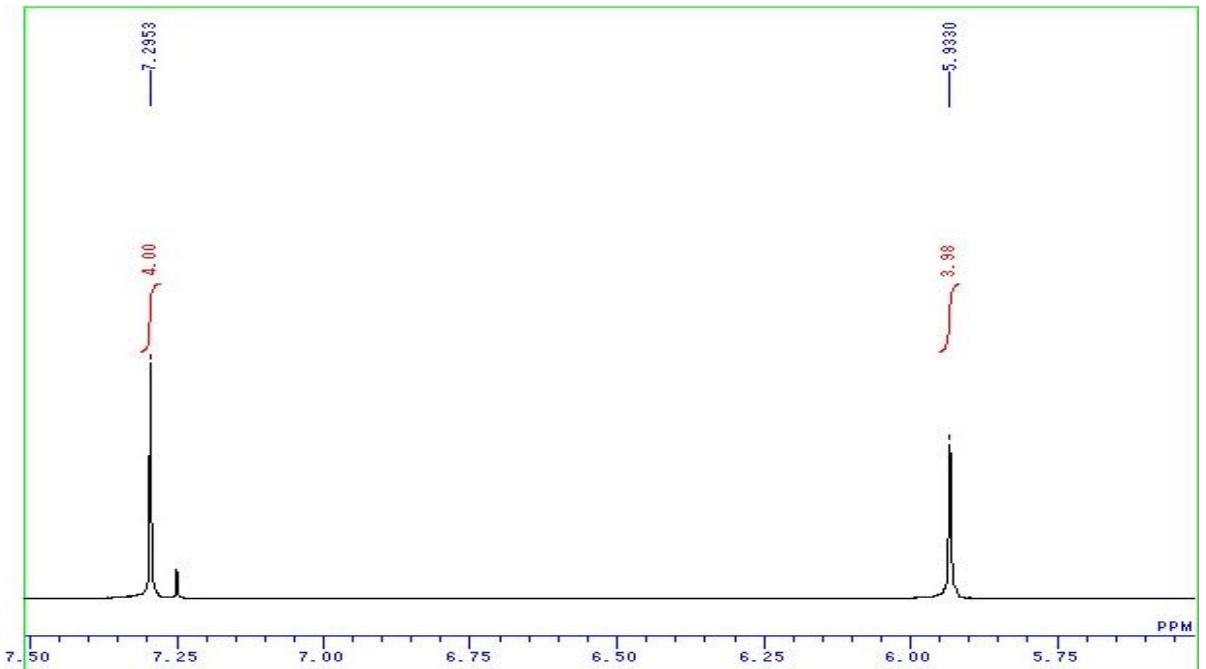

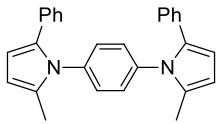

1,1'-p-phenylenebis[2-methyl-5-phenylpyrrole] (4)

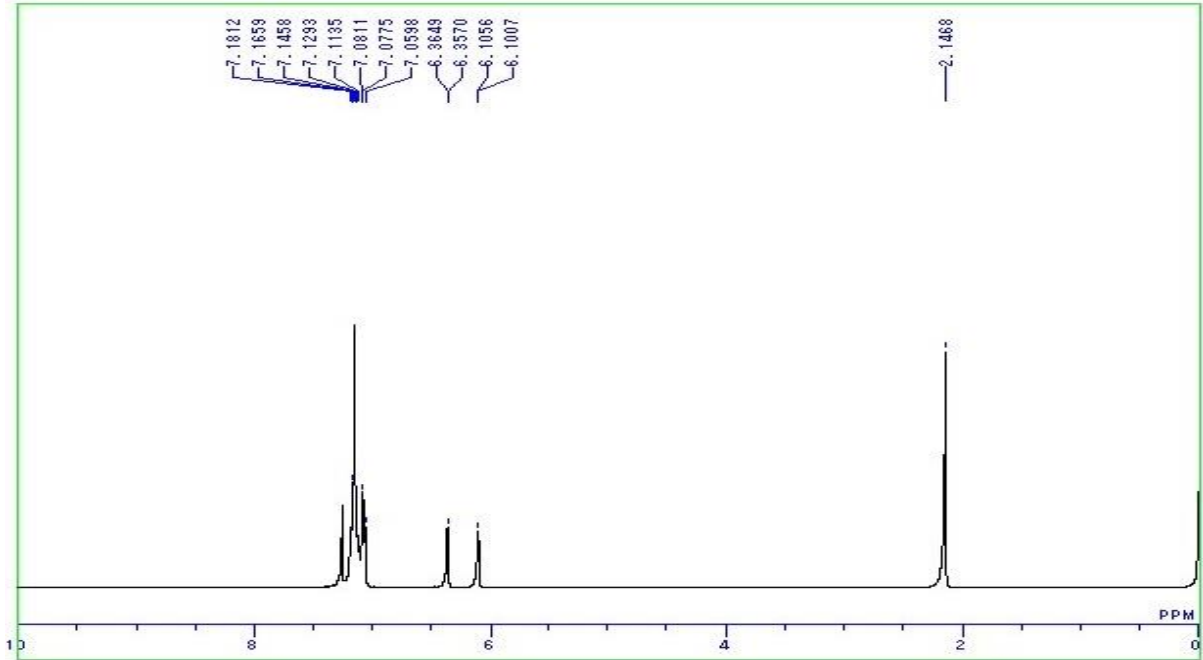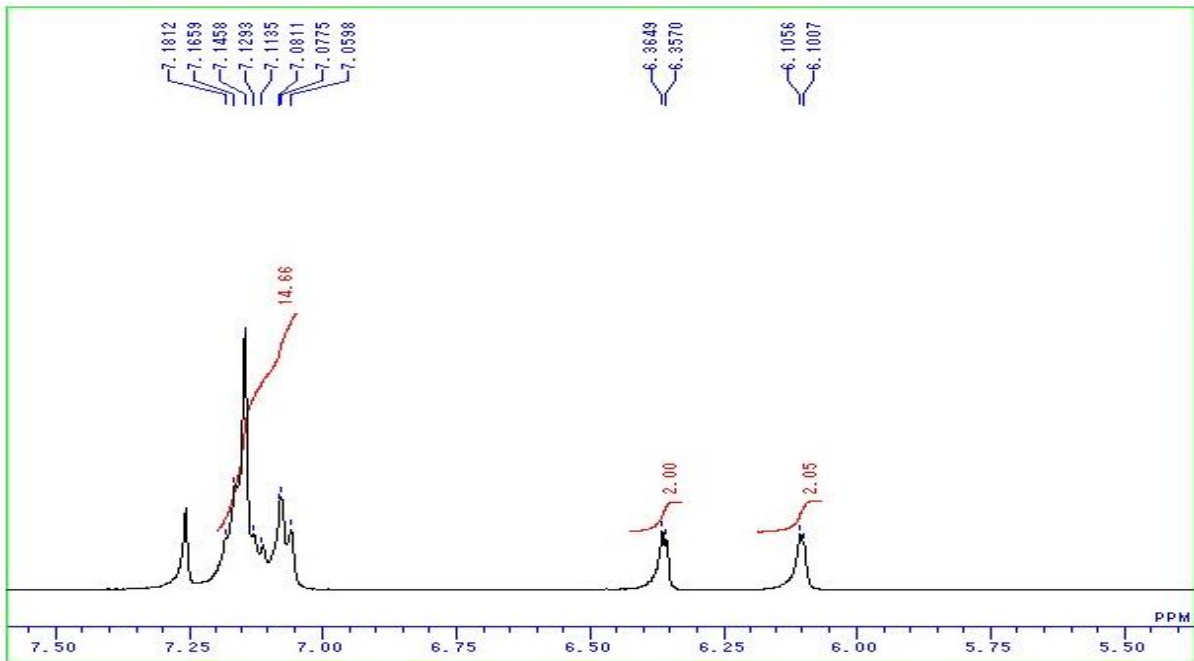

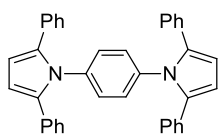

1,1'-p-phenylenebis[2,5-diphenylpyrrole] (5)

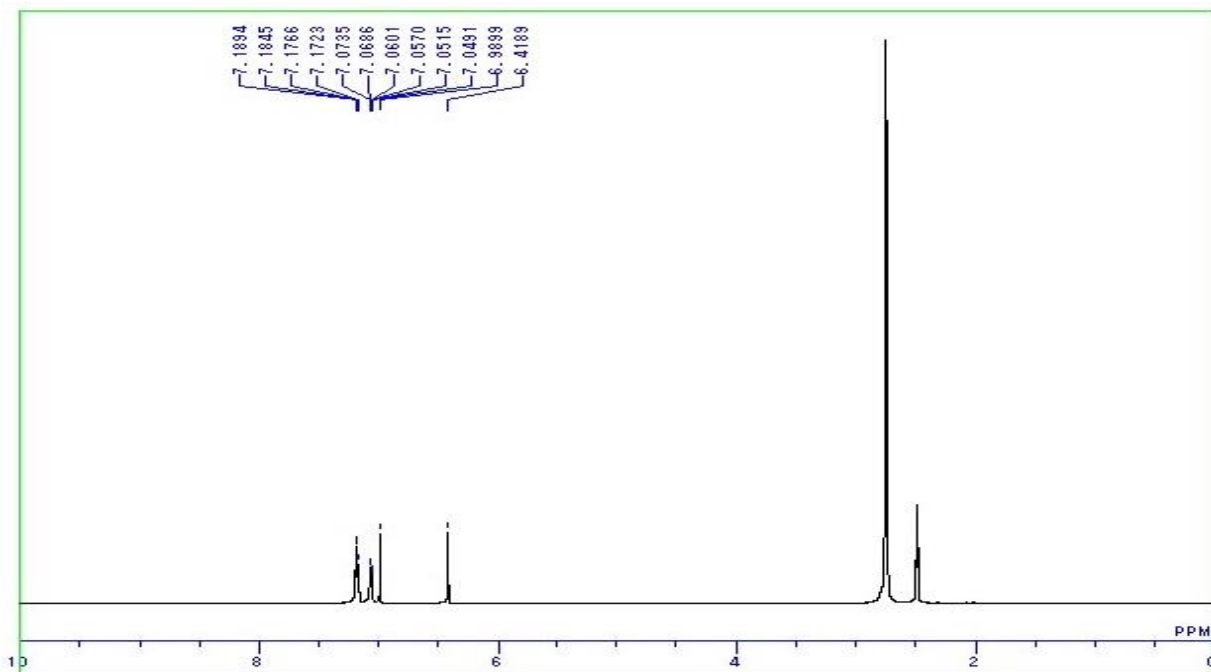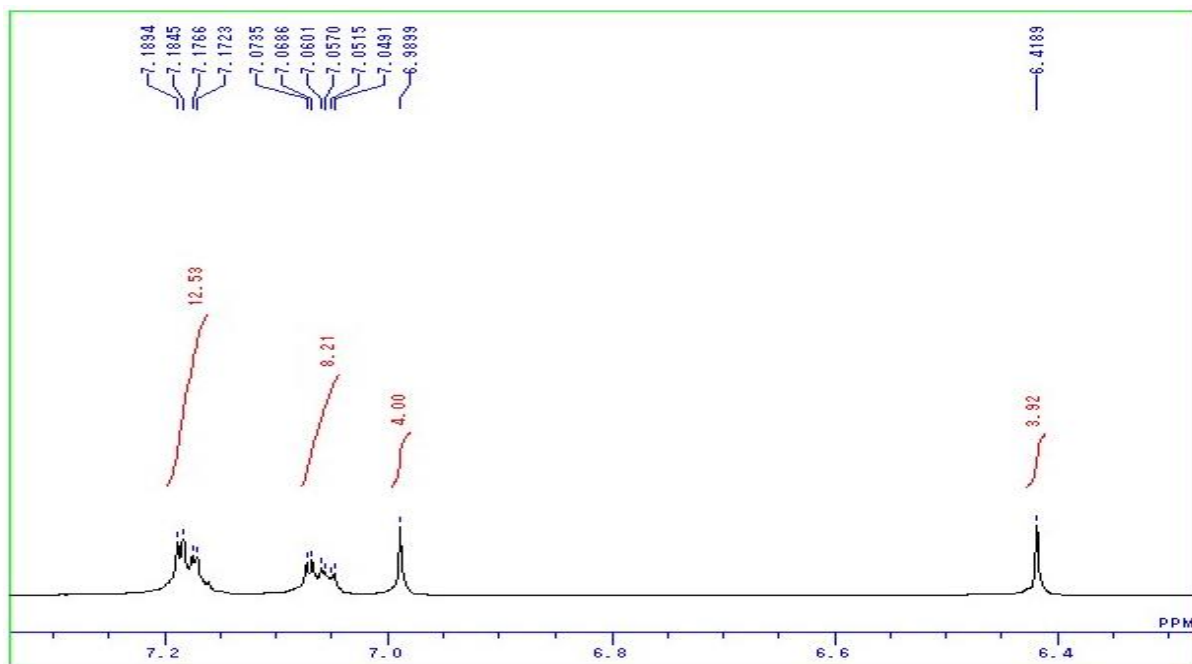

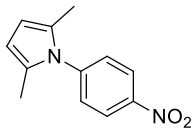

2,5-Dimethyl-1-(4-nitrophenyl)-1H-pyrrole (6)

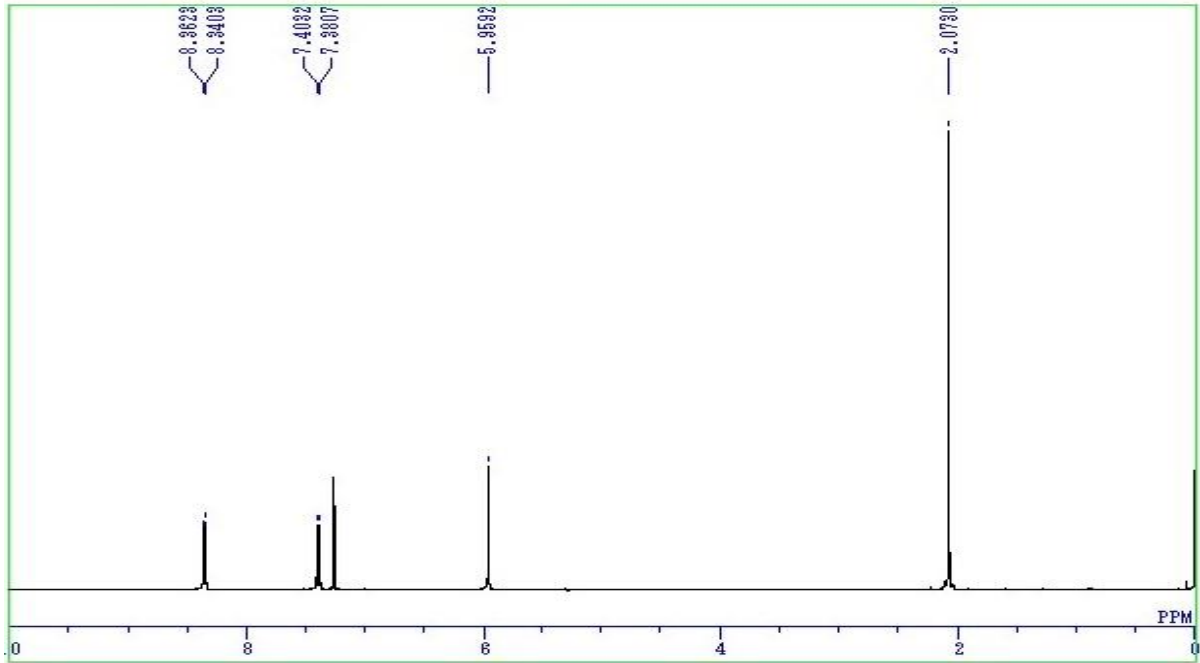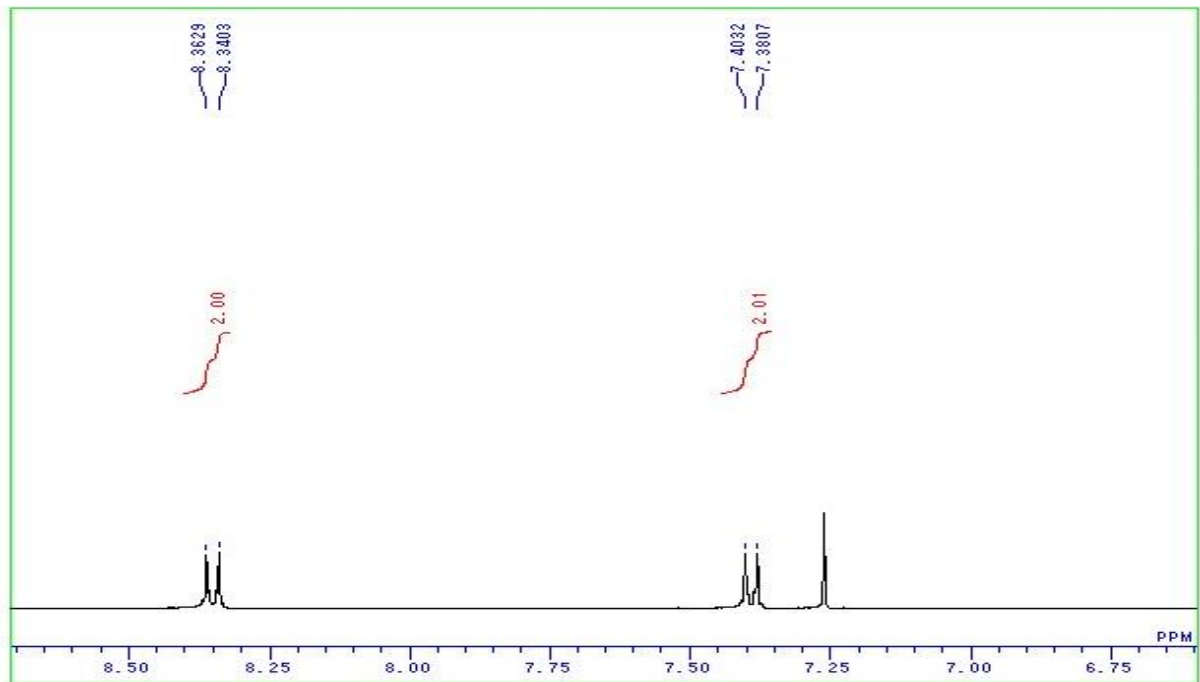



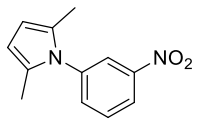

2,5-Dimethyl-1-(4-nitrophenyl)-1H-pyrrole (7)

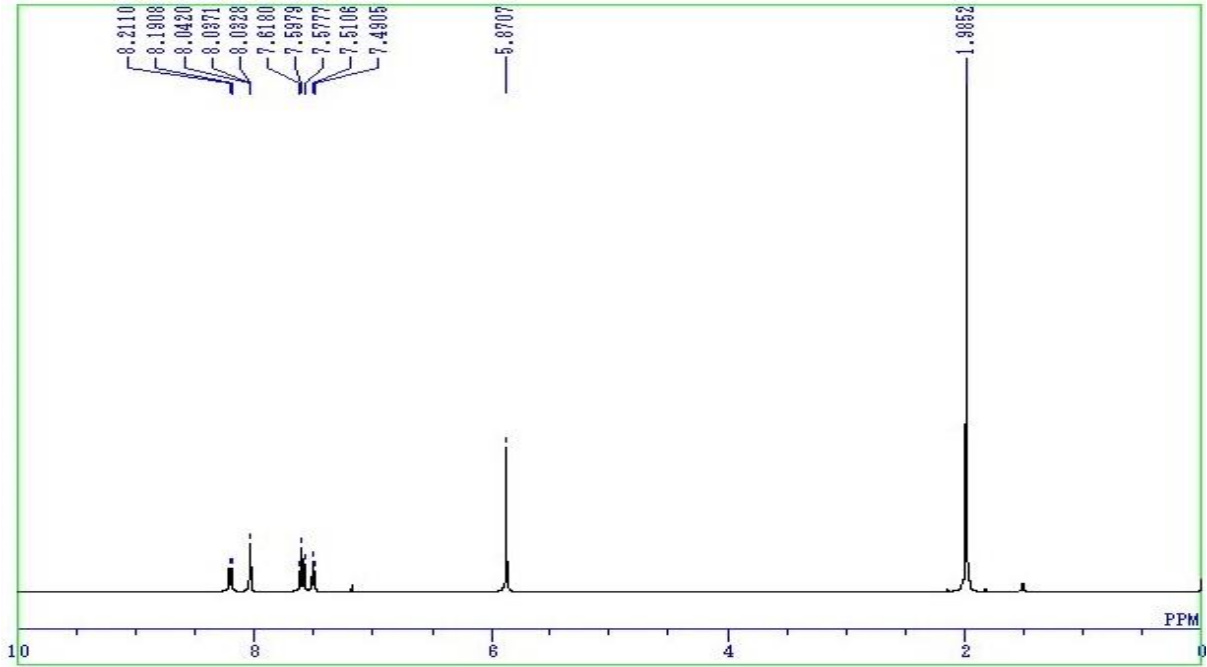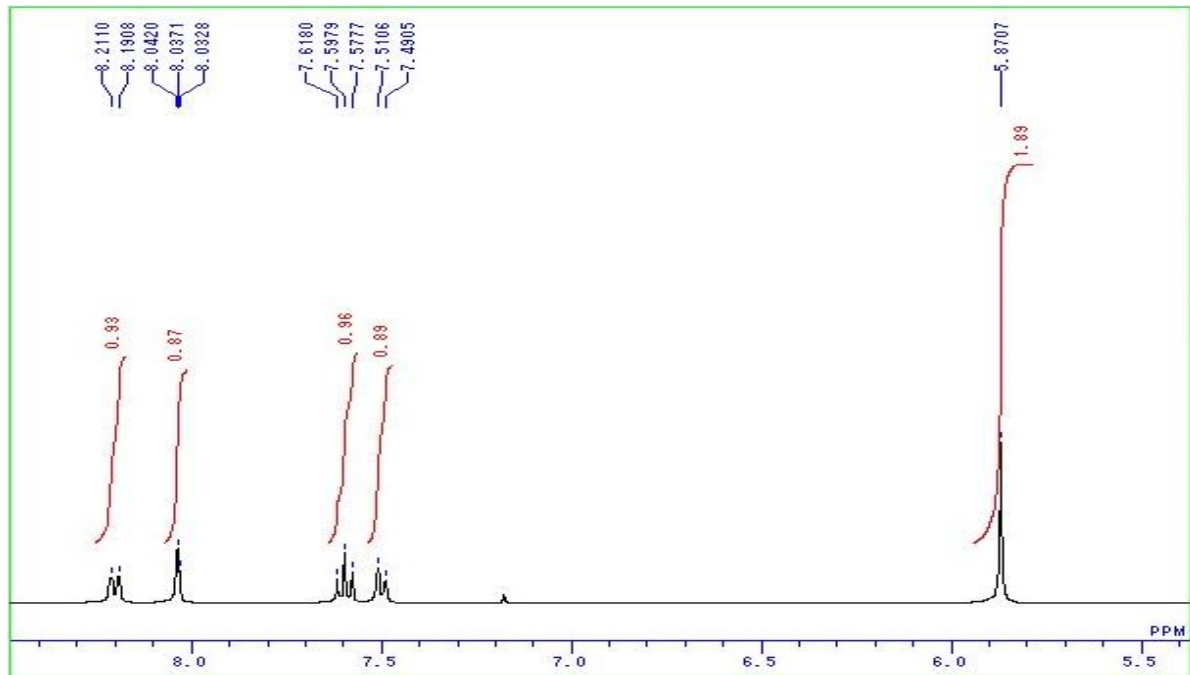

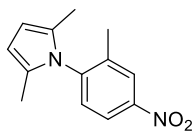

2,5-Dimethyl-1-(2-methyl-4-nitrophenyl)-1H-pyrrole (**8**)

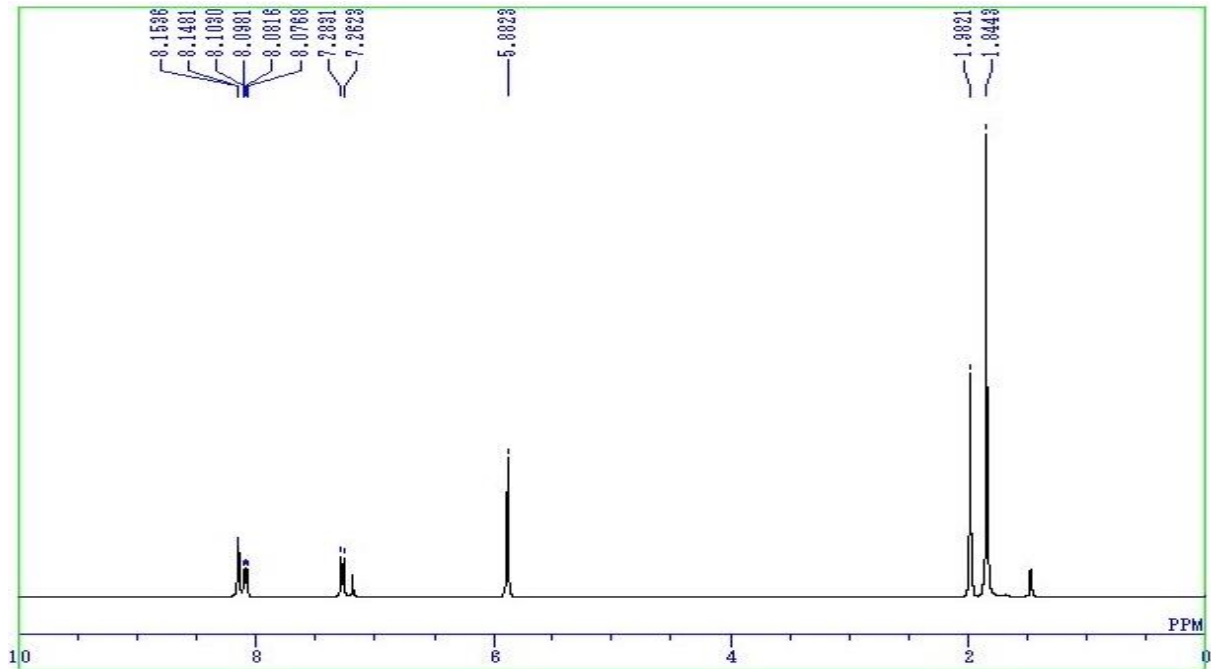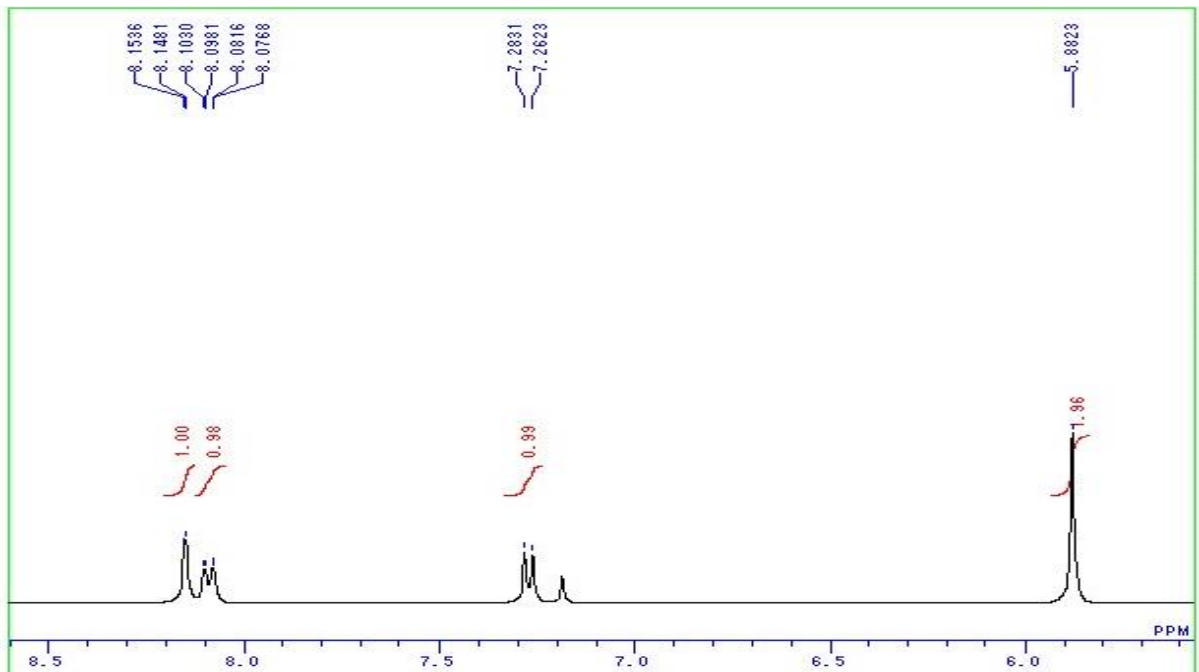

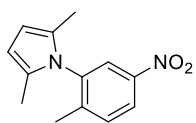

2,5-Dimethyl-1-(2-methyl-5-nitrophenyl)-1H-pyrrole (9)

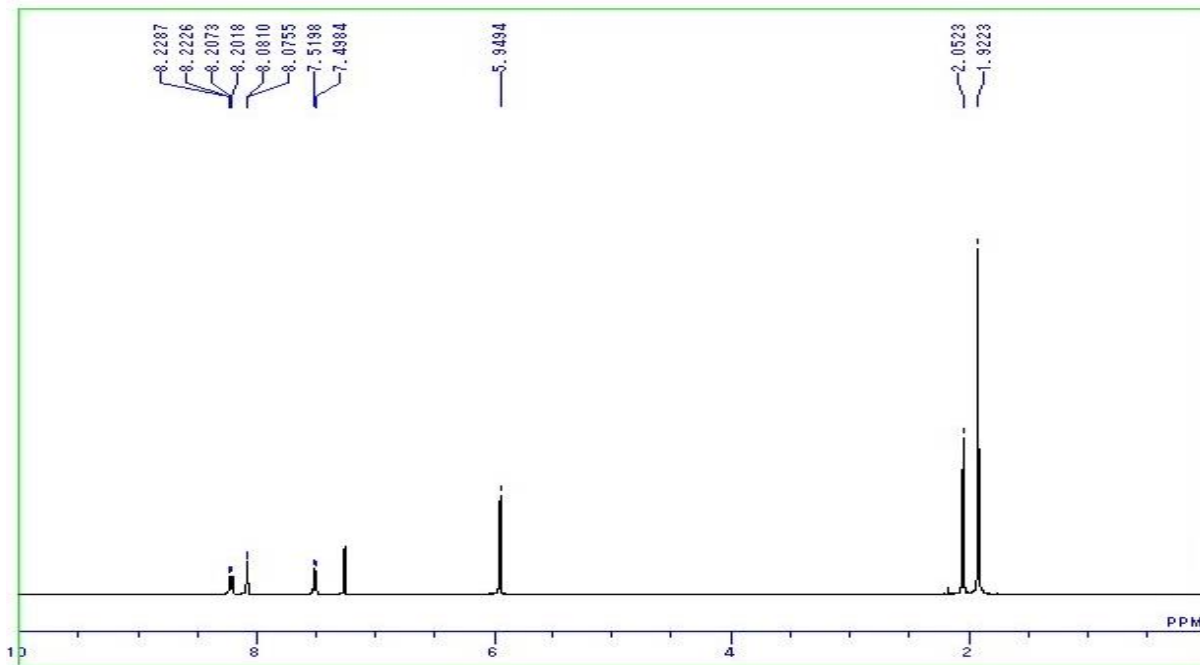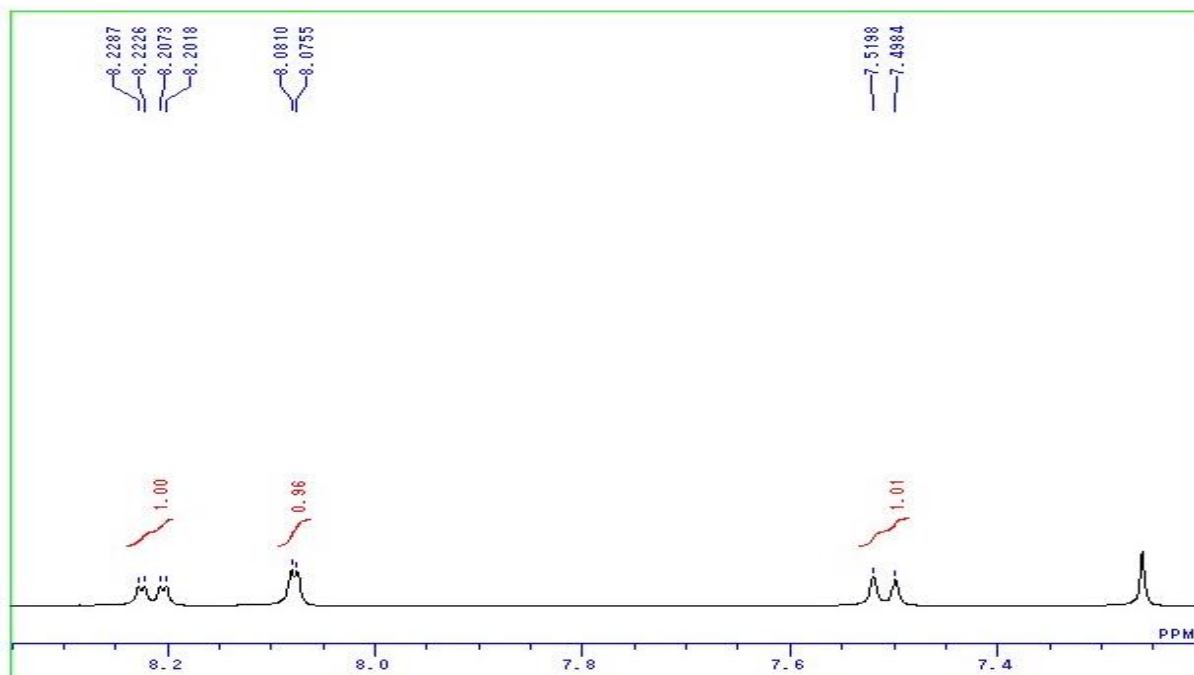

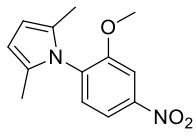

1-(2-Methoxy-4-nitrophenyl)-2,5-dimethyl-1H-pyrrole (10)

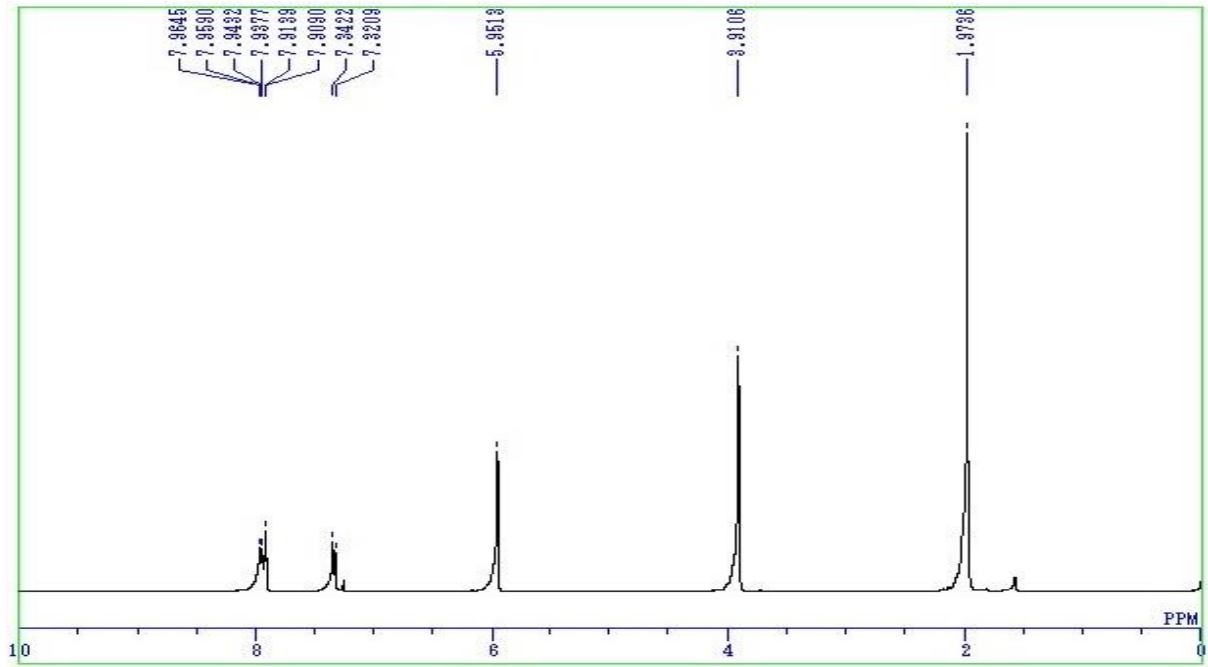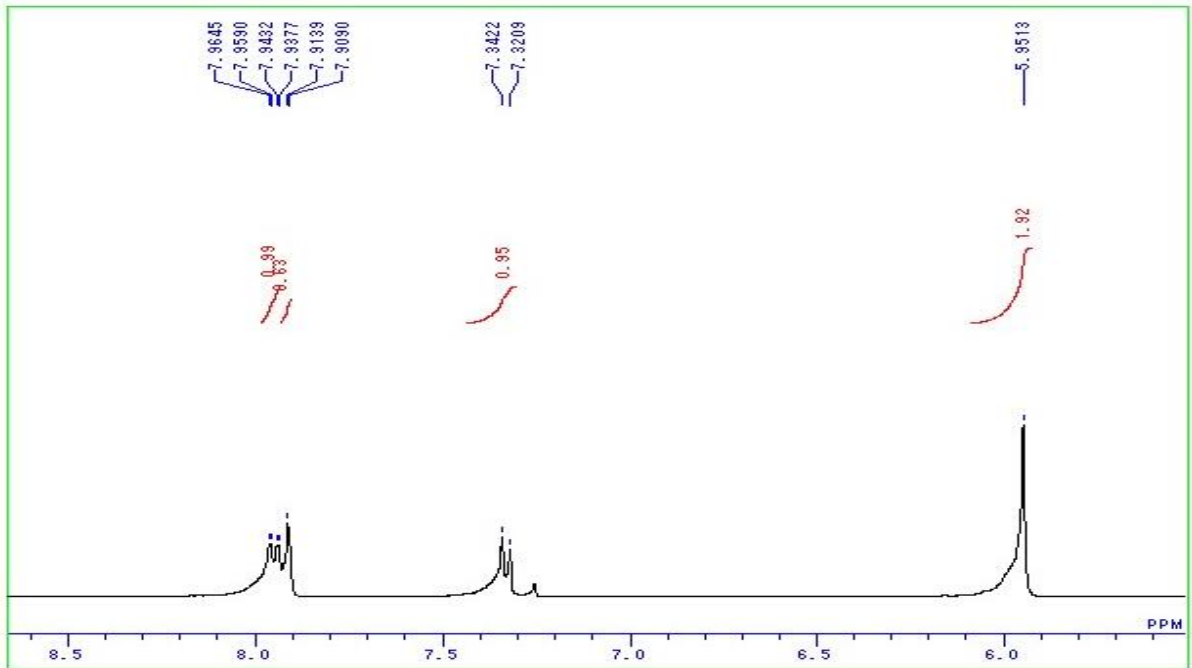

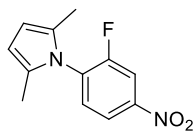

1-(2-Fluoro-4-nitrophenyl)-2,5-dimethyl-1H-pyrrole (11)

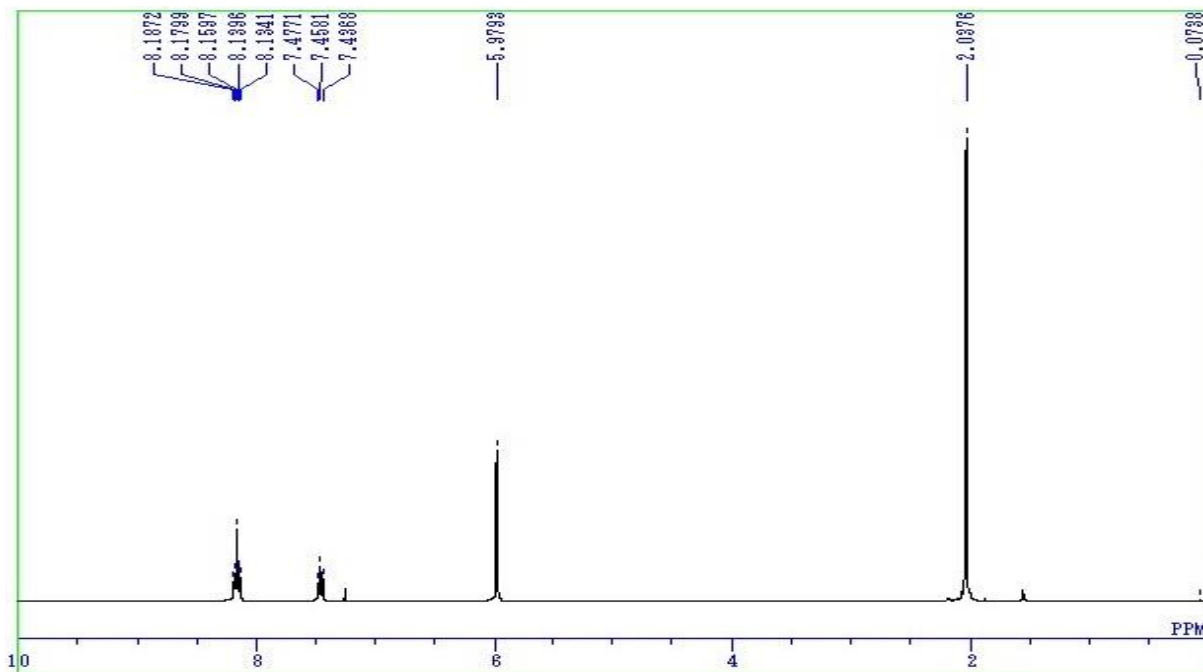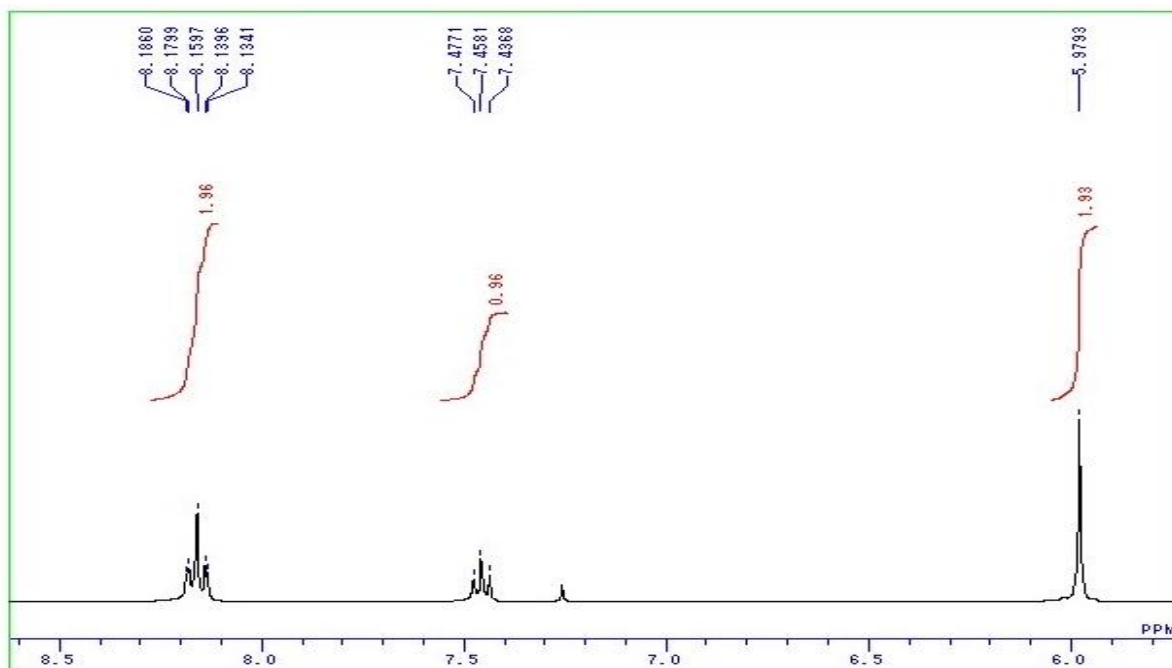

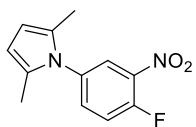

1-(4-Fluoro-3-nitrophenyl)-2,5-dimethyl-1H-pyrrole (12)

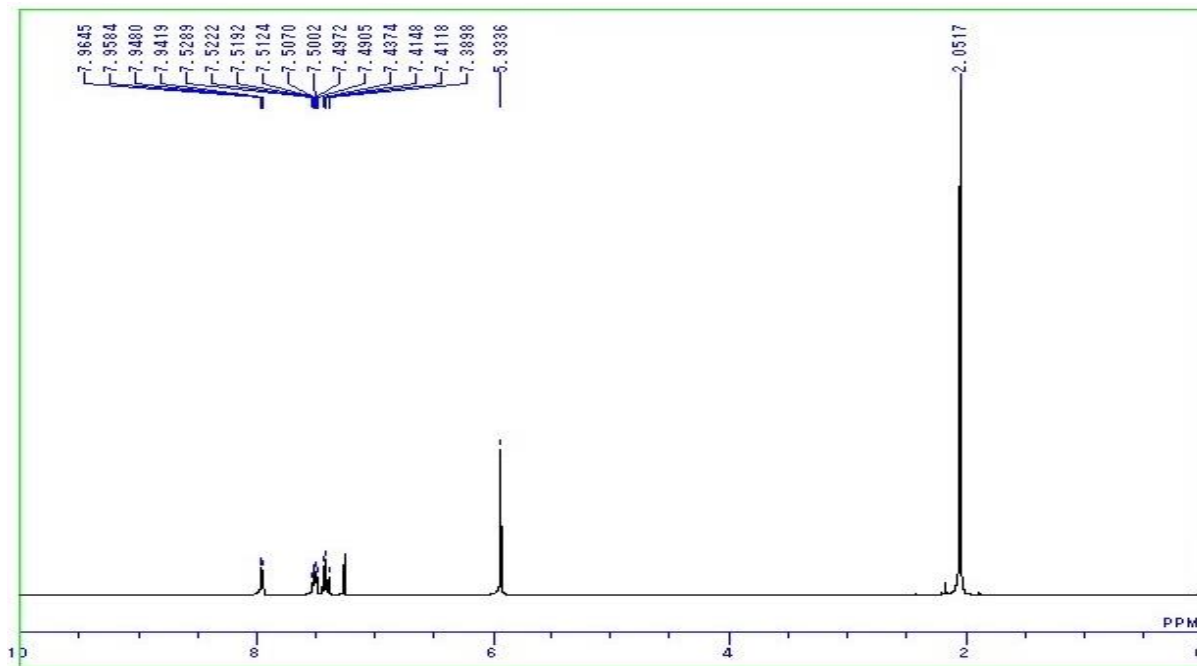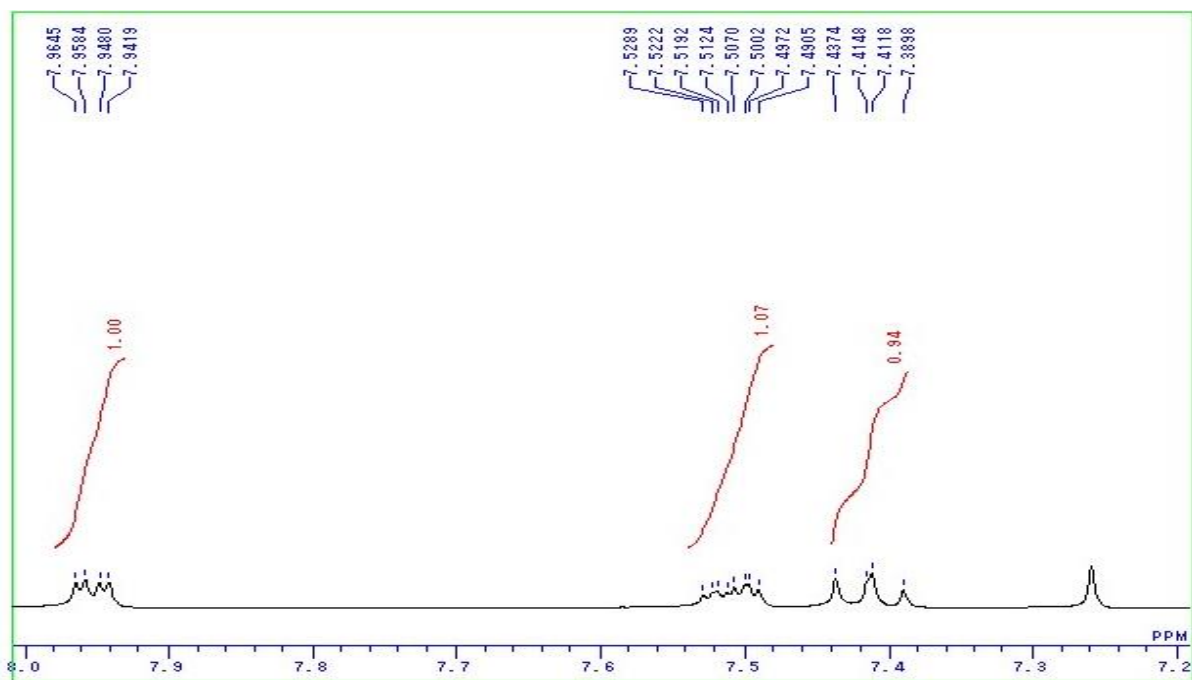

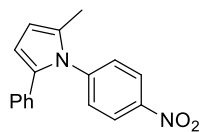

2-Methyl-1-(4-nitrophenyl)-5-phenyl-1H-pyrrole (**13**)

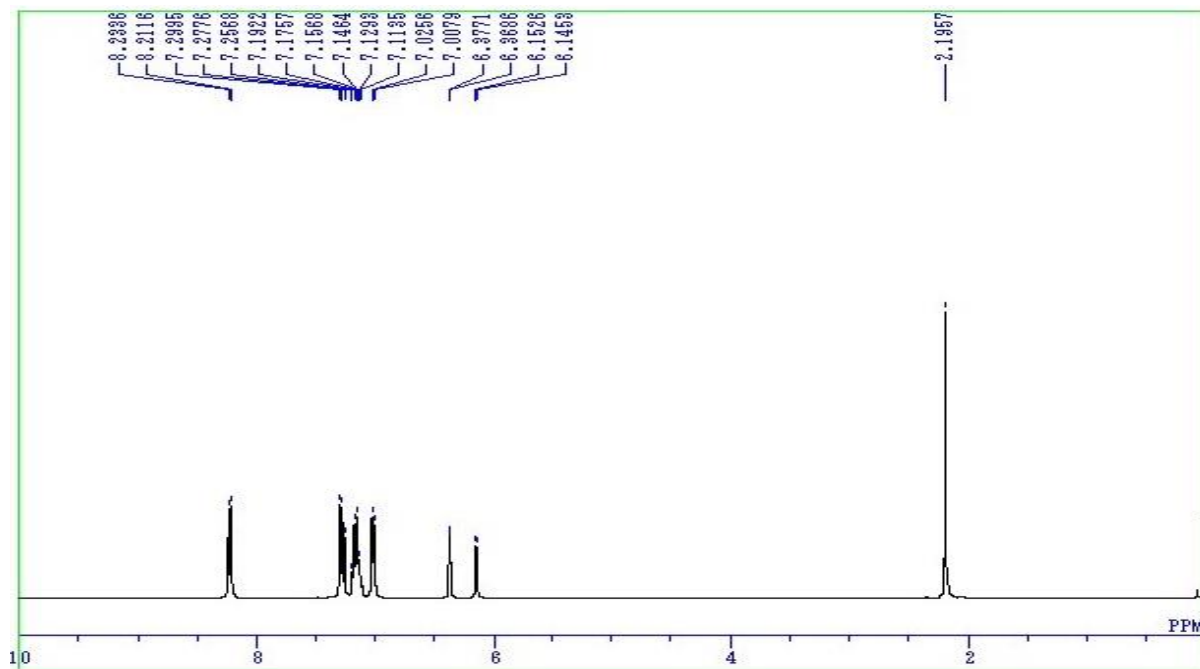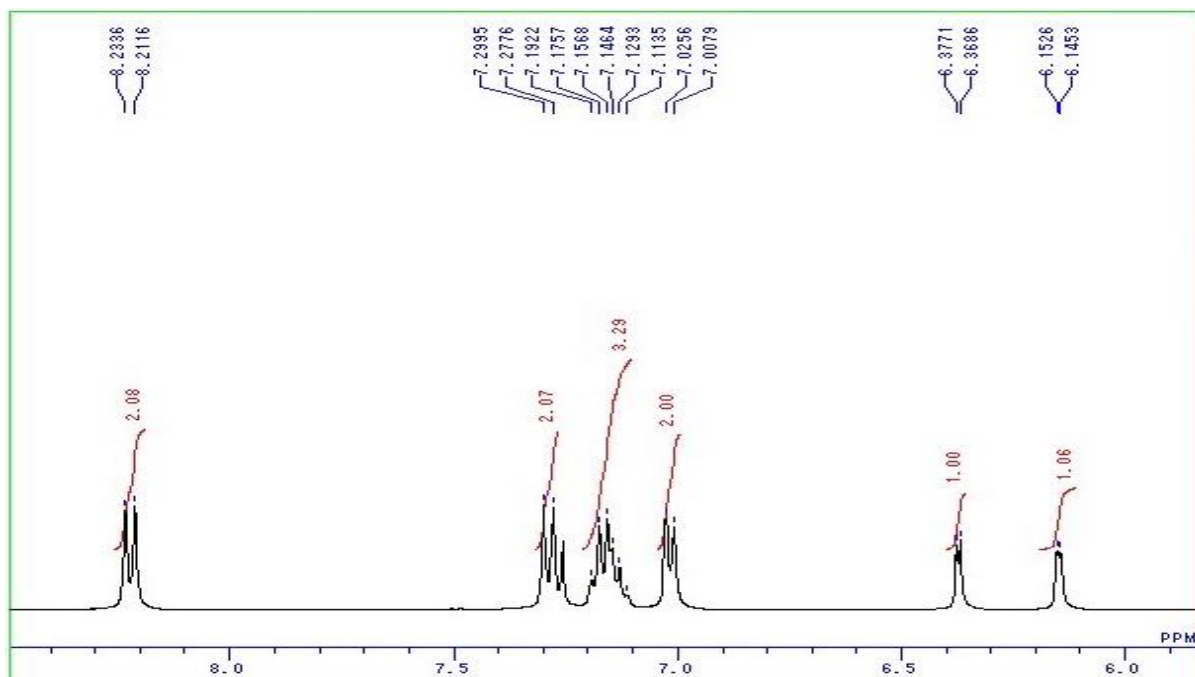

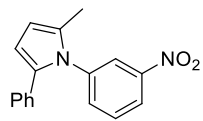

2-Methyl-1-(3-nitrophenyl)-5-phenyl-1H-pyrrole (**14**)

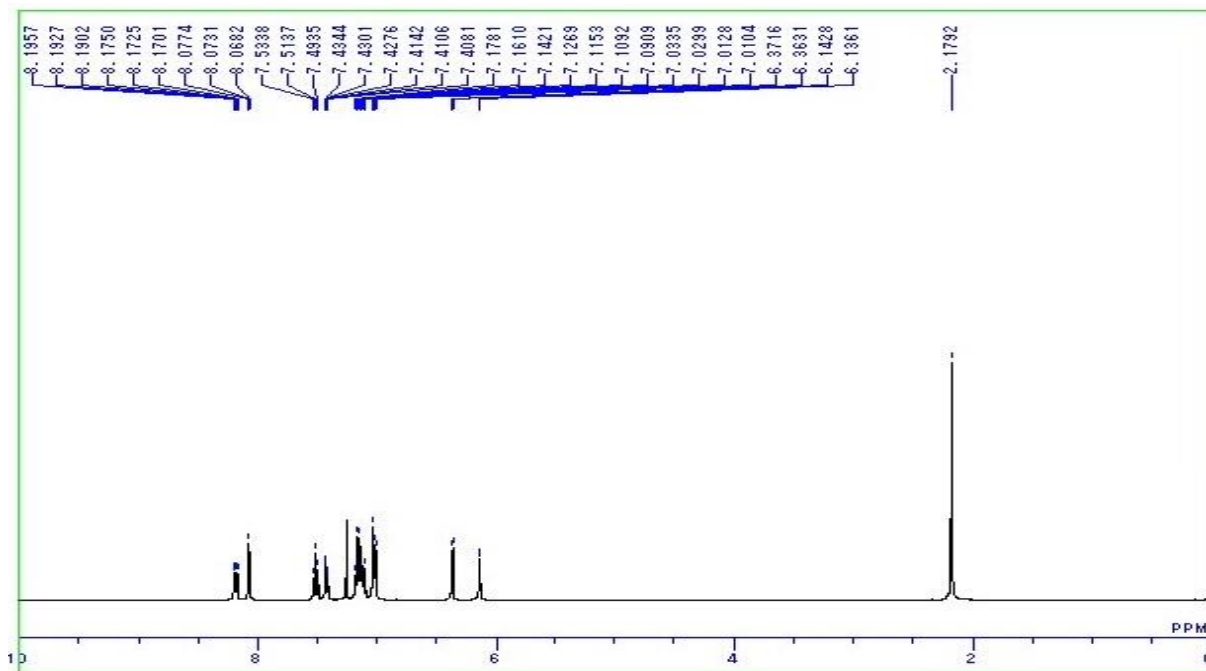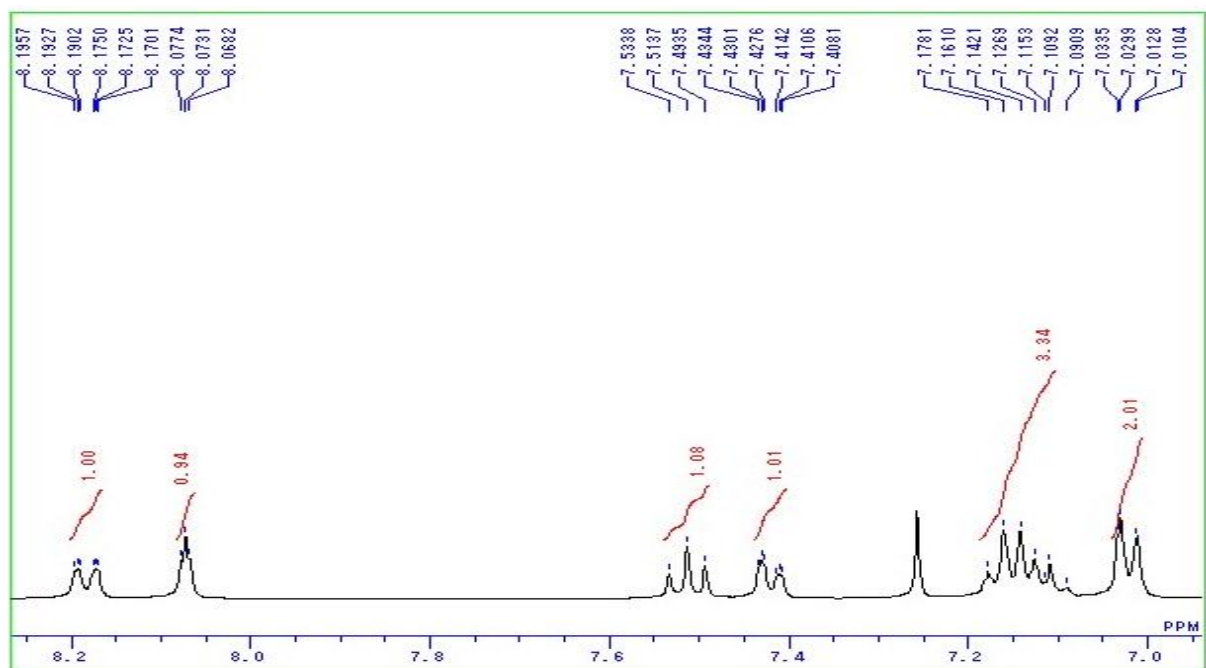



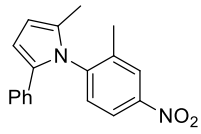

2-Methyl-1-(2-methyl-4-nitrophenyl)-5-phenyl-1H-pyrrole (**15**)

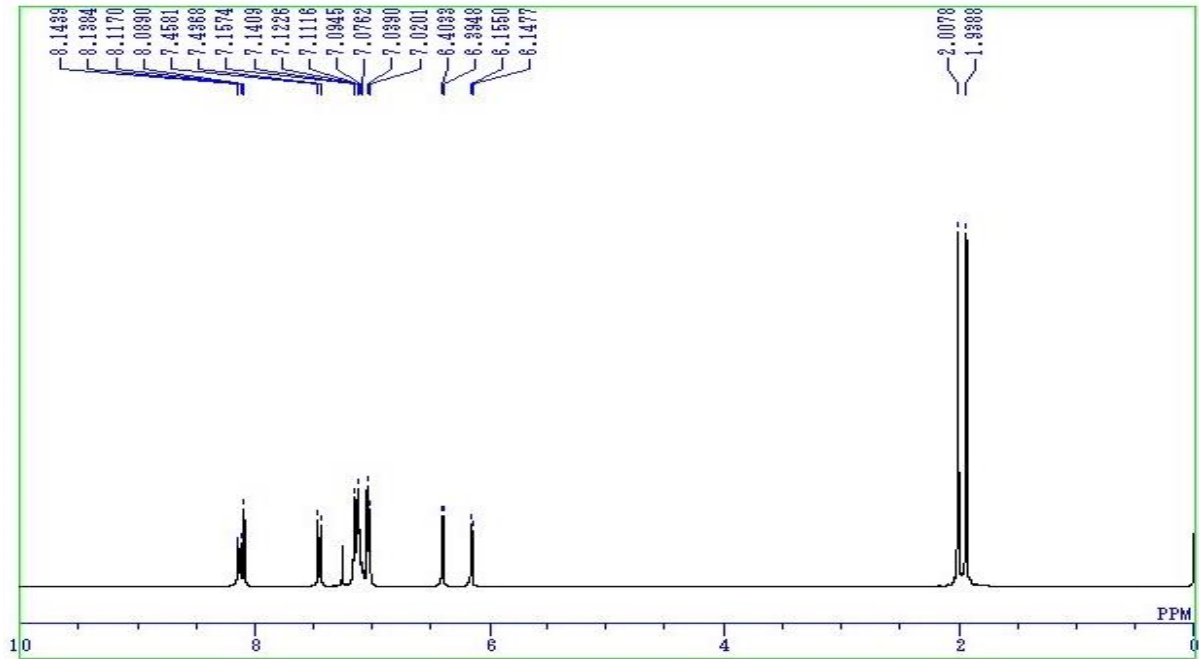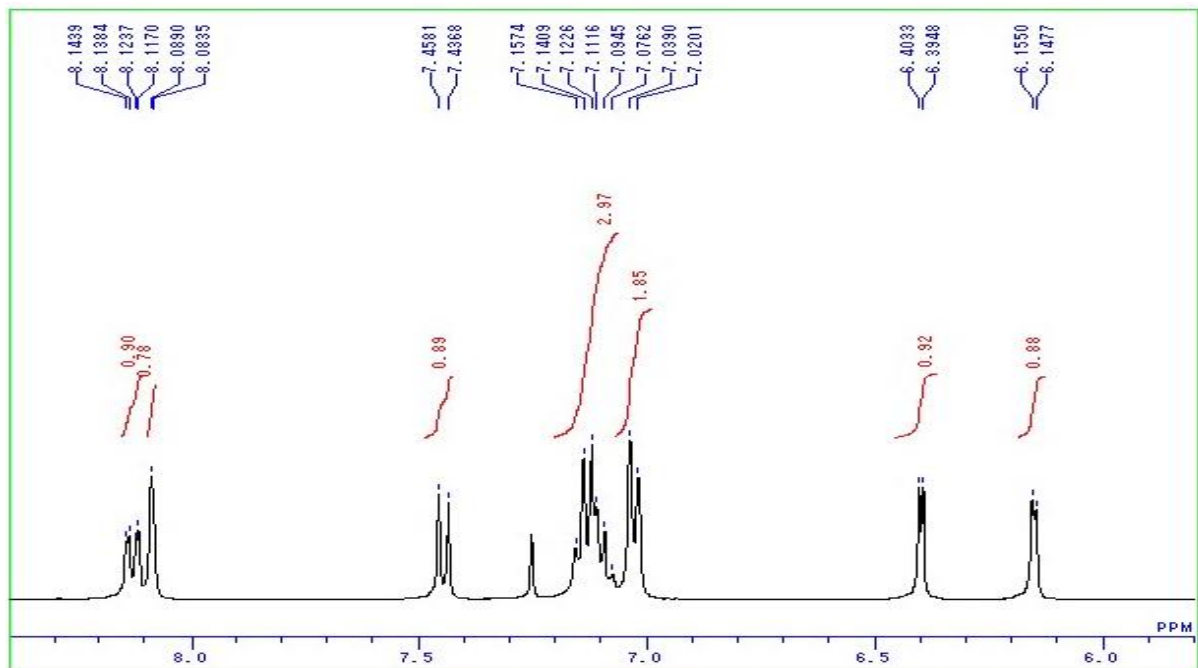

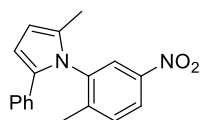

2-Methyl-1-(6-methyl-3-nitrophenyl)-5-phenyl-1H-pyrrole (**16**)

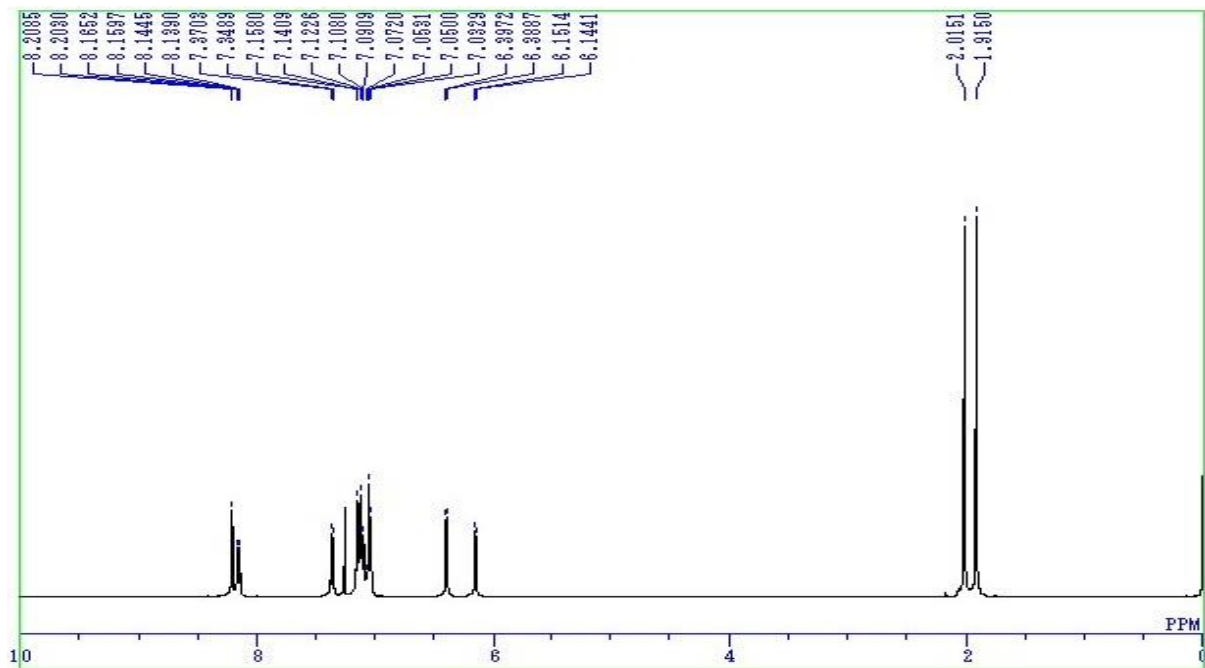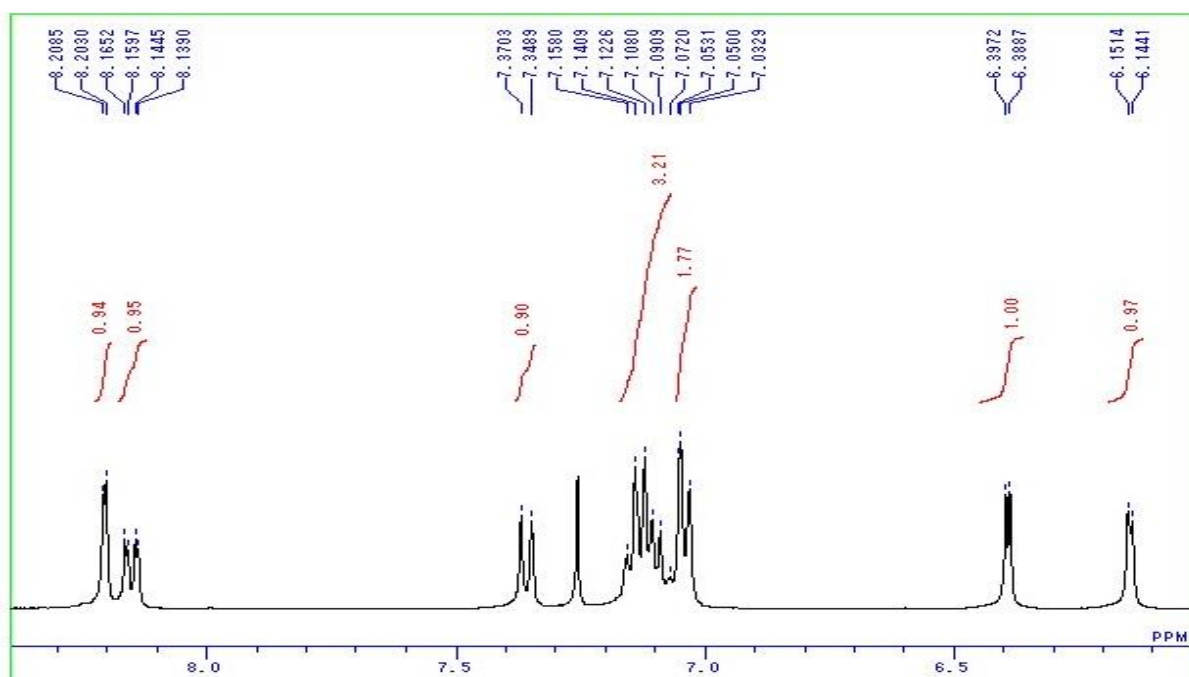

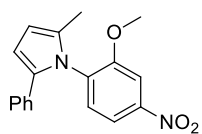

1-(2-Methoxy-4-nitrophenyl)-2-methyl-5-phenyl-1H-pyrrole (17)

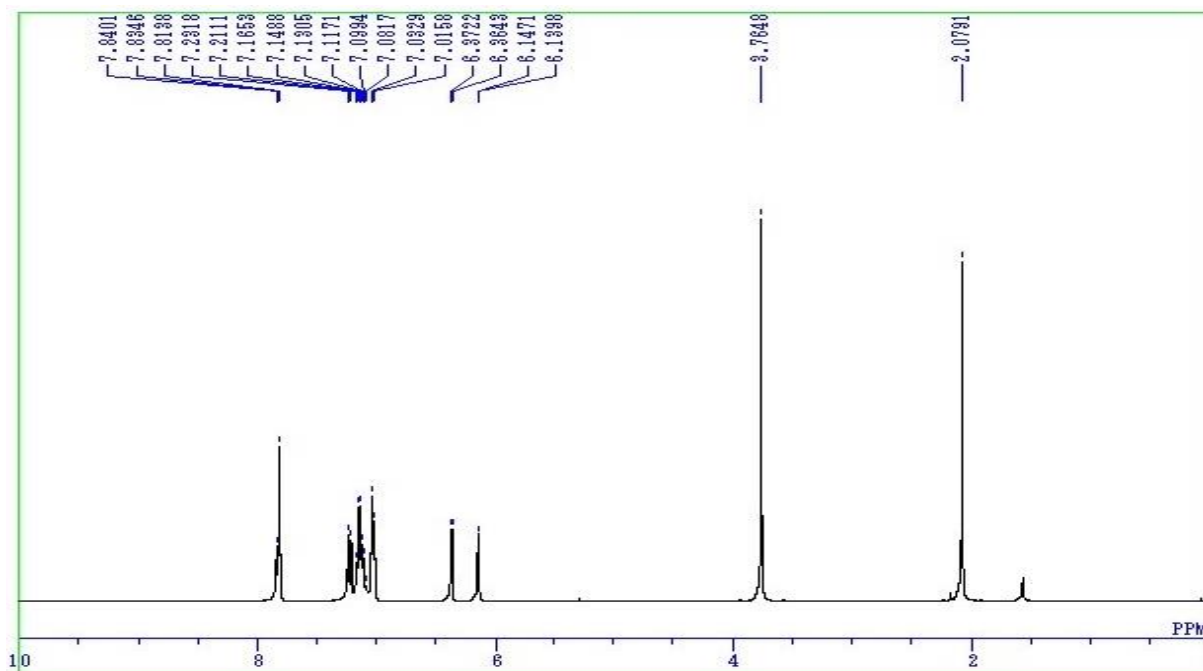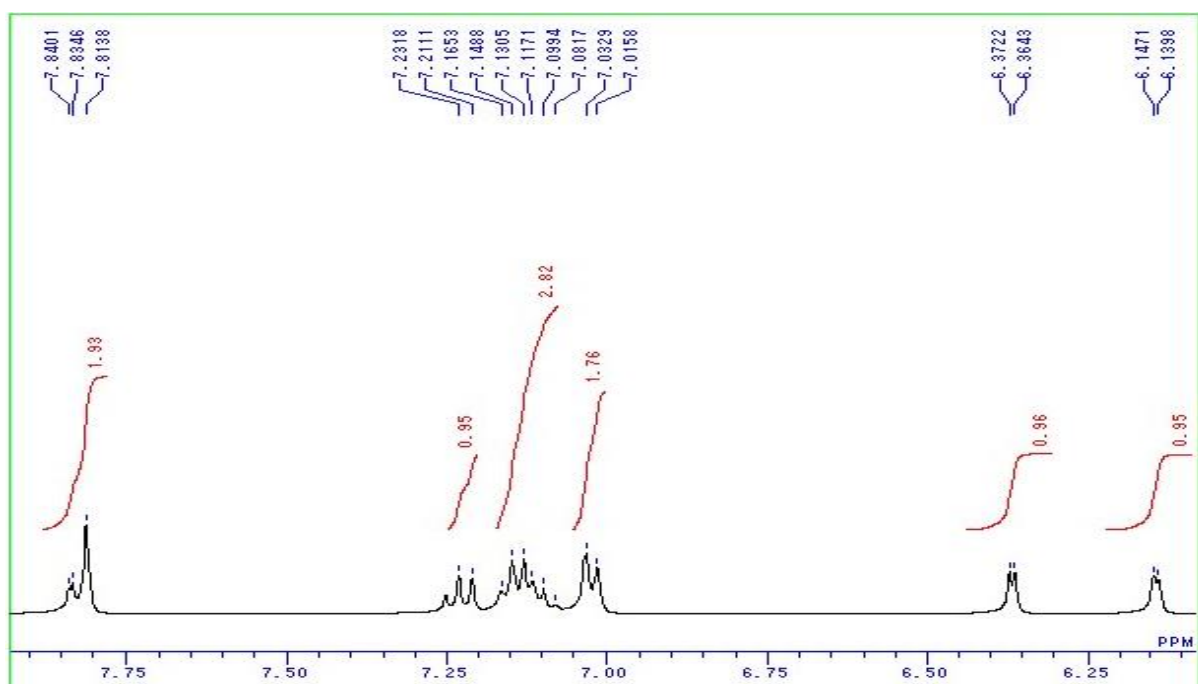

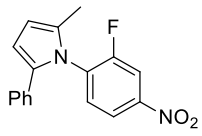

1-(2-Fluoro-4-nitrophenyl)-2-methyl-5-phenyl-1H-pyrrole (**18**)

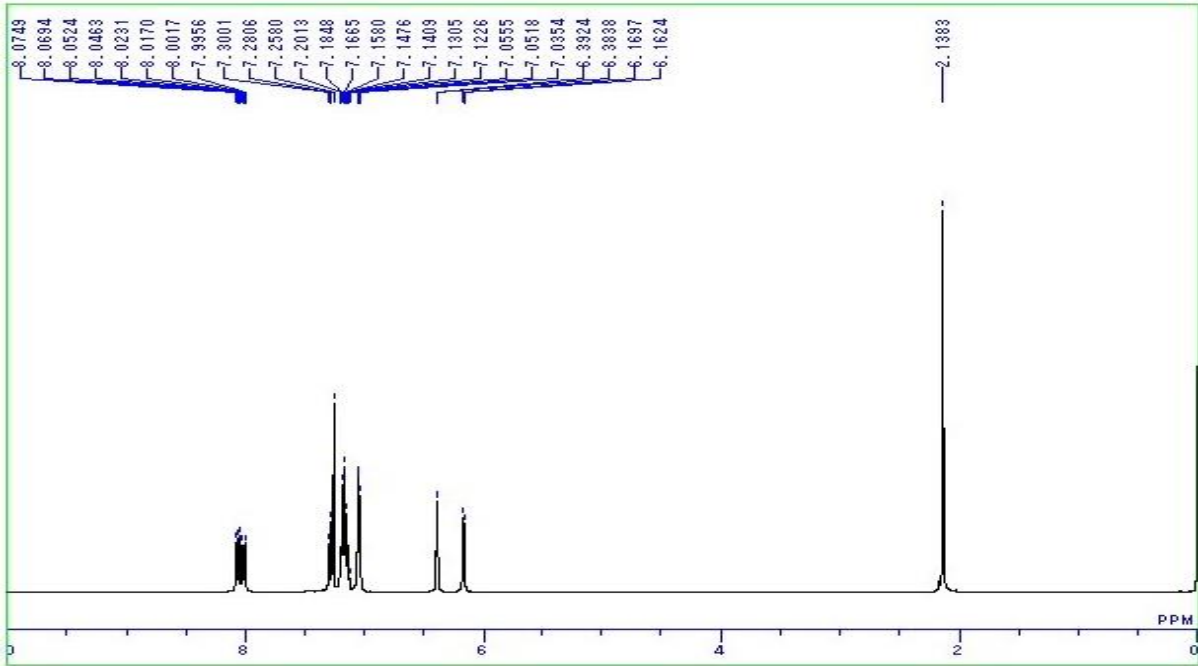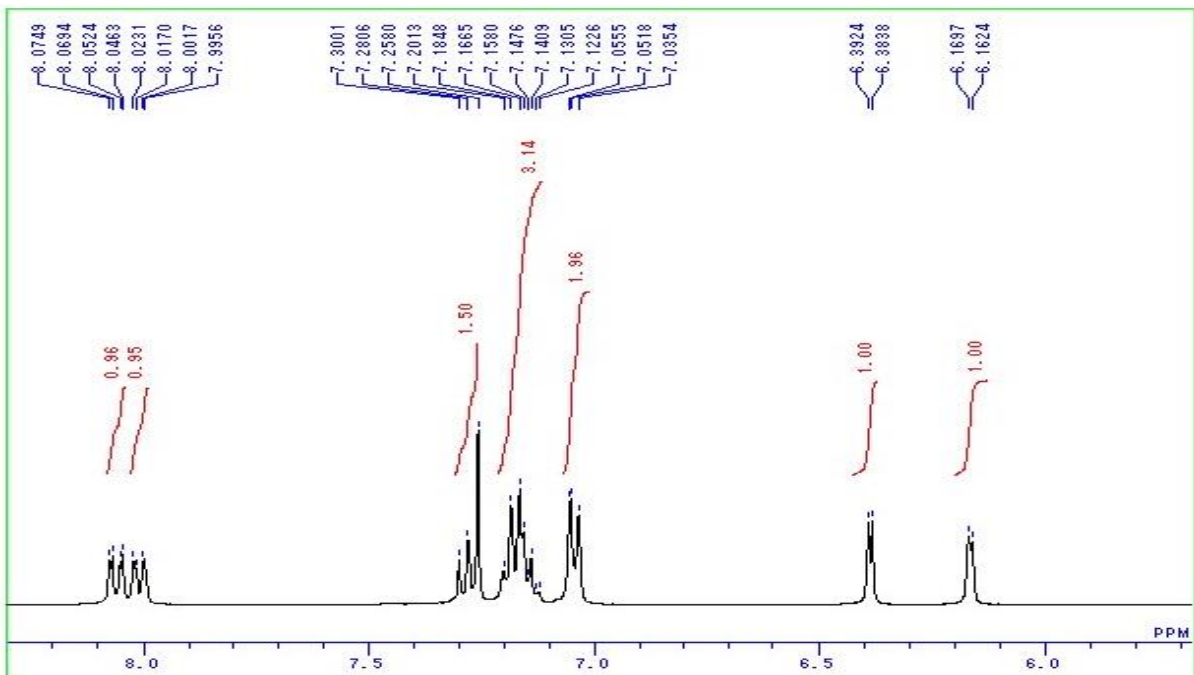

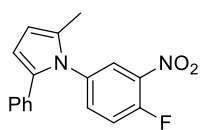

1-(4-Fluoro-3-nitrophenyl)-2-methyl-5-phenyl-1H-pyrrole (**19**)

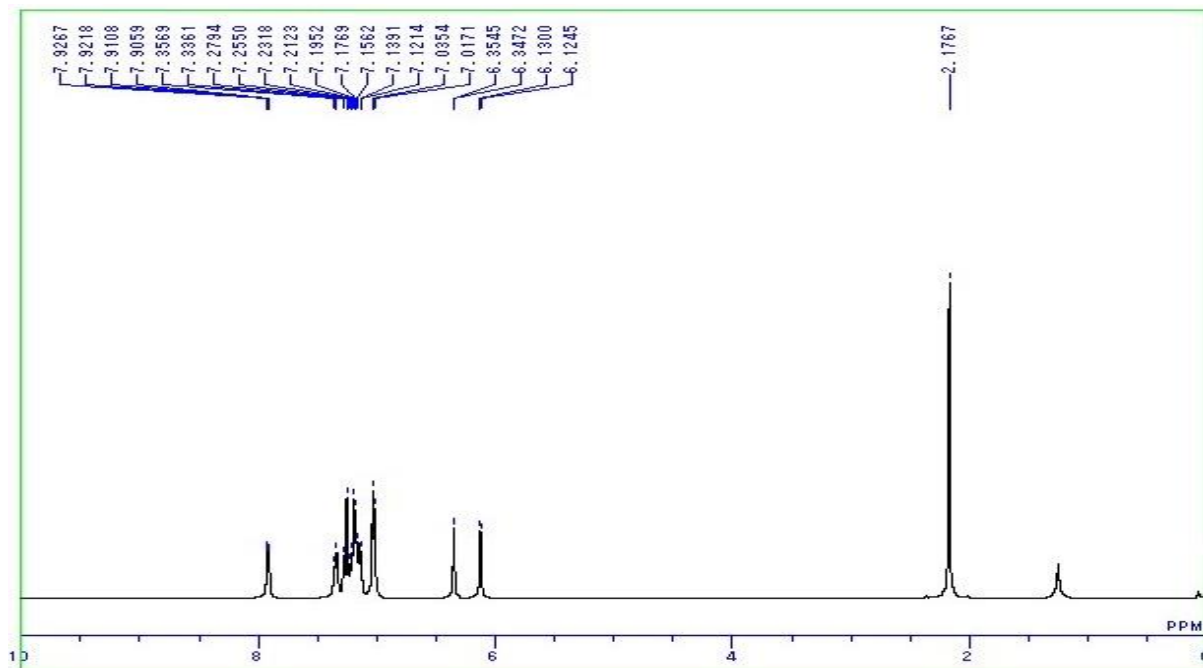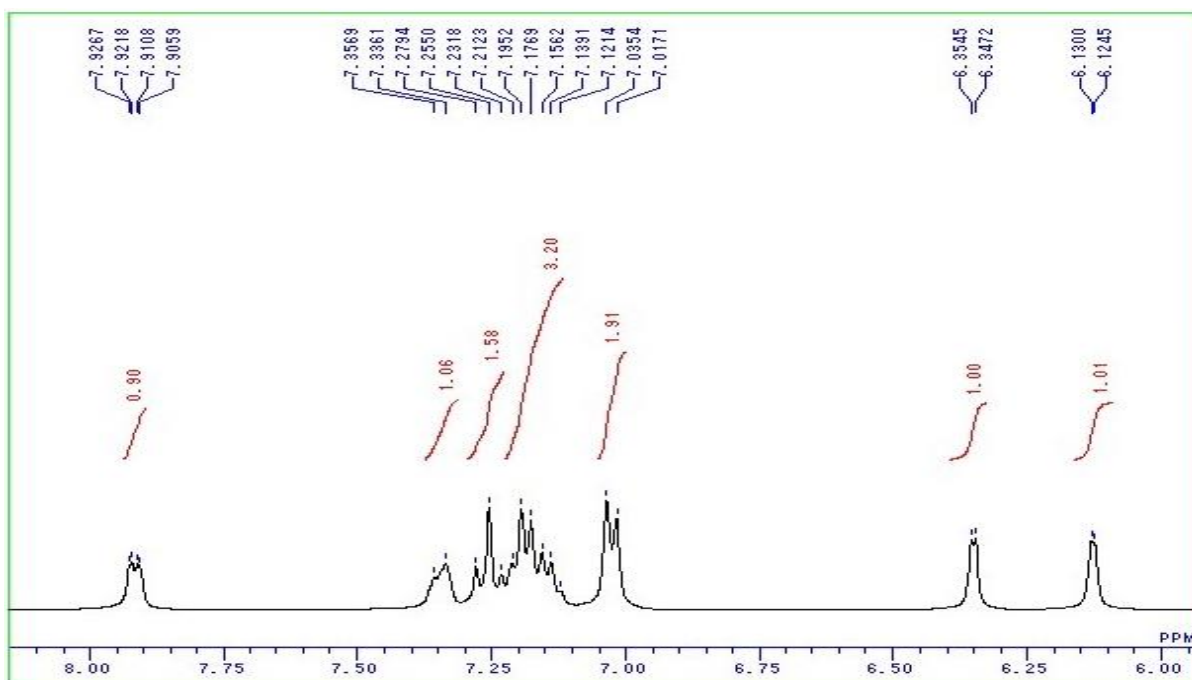

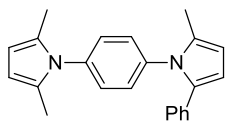

2,5-Dimethyl-1-[4-(2-methyl-5-phenyl-1H-pyrrol-1-yl)phenyl]-1H-pyrrole (20)

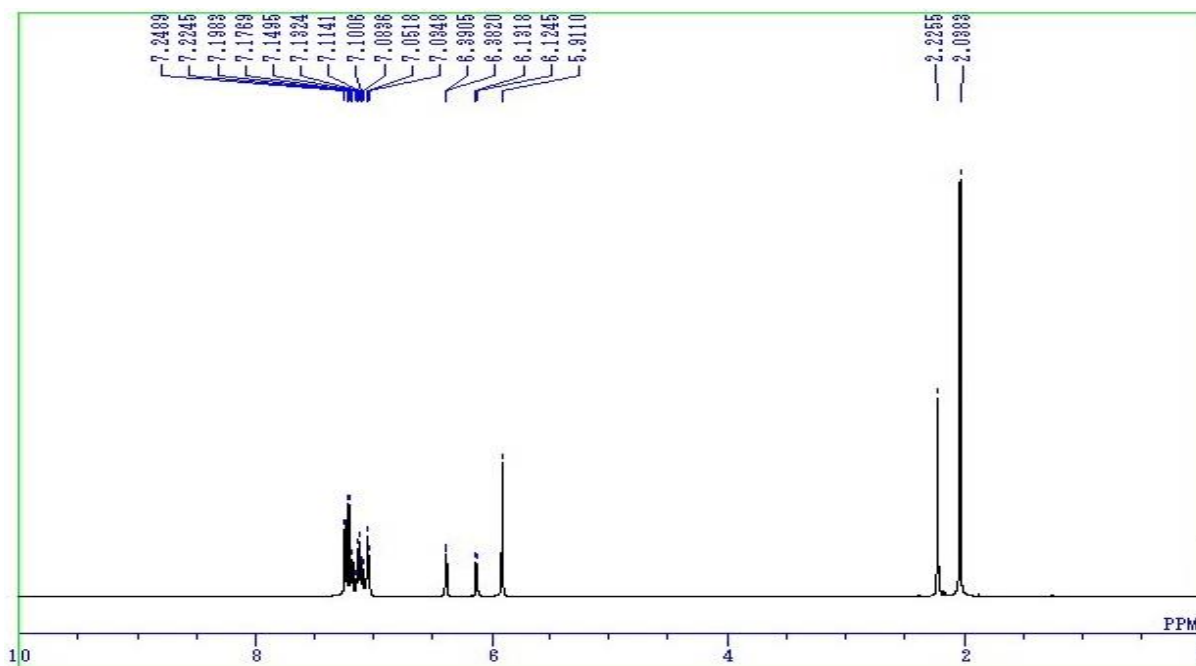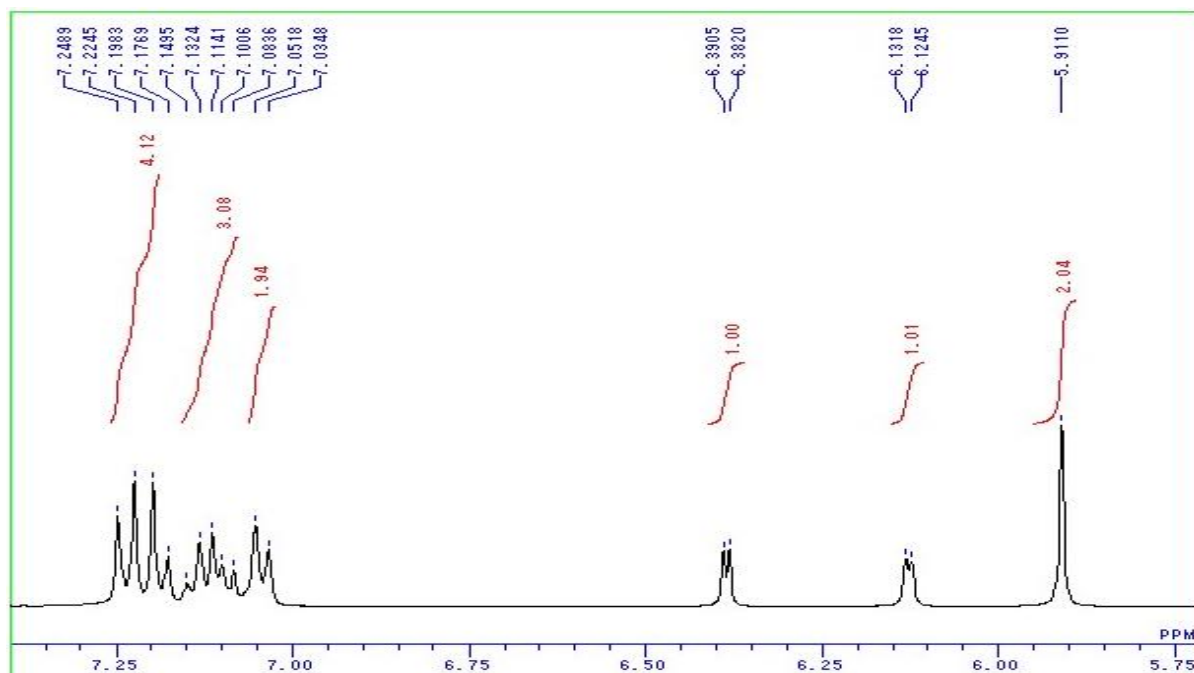

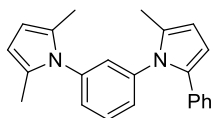

2,5-Dimethyl-1-[3-(2-methyl-5-phenyl-1H-pyrrol-1-yl)phenyl]-1H-pyrrole (21)

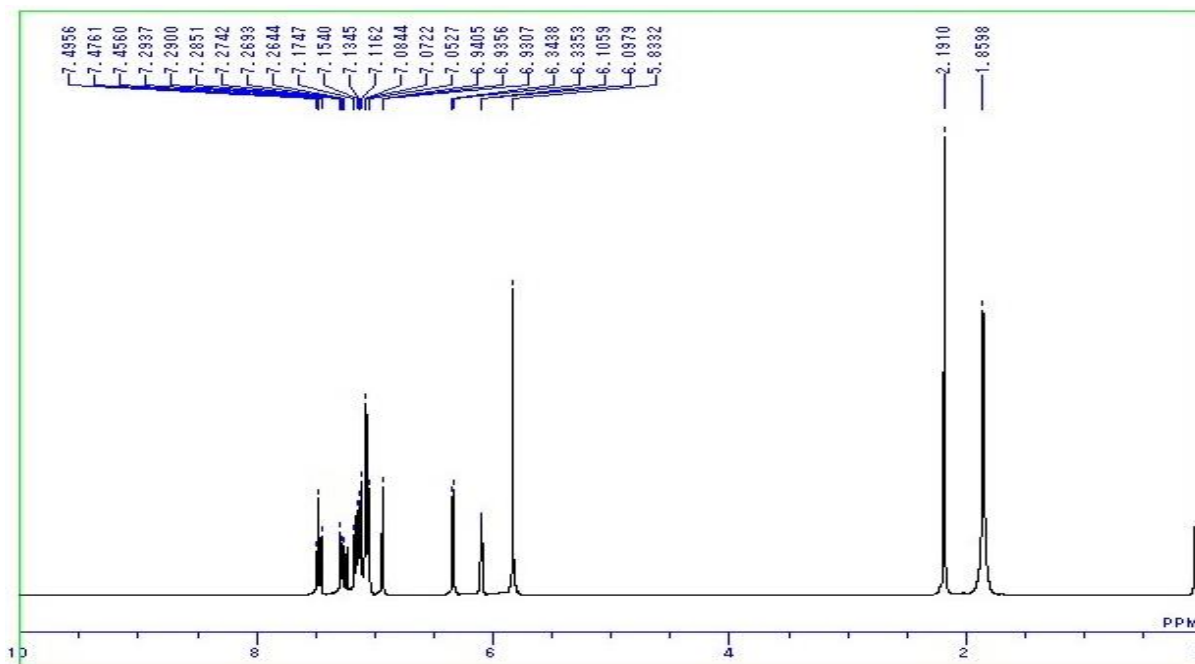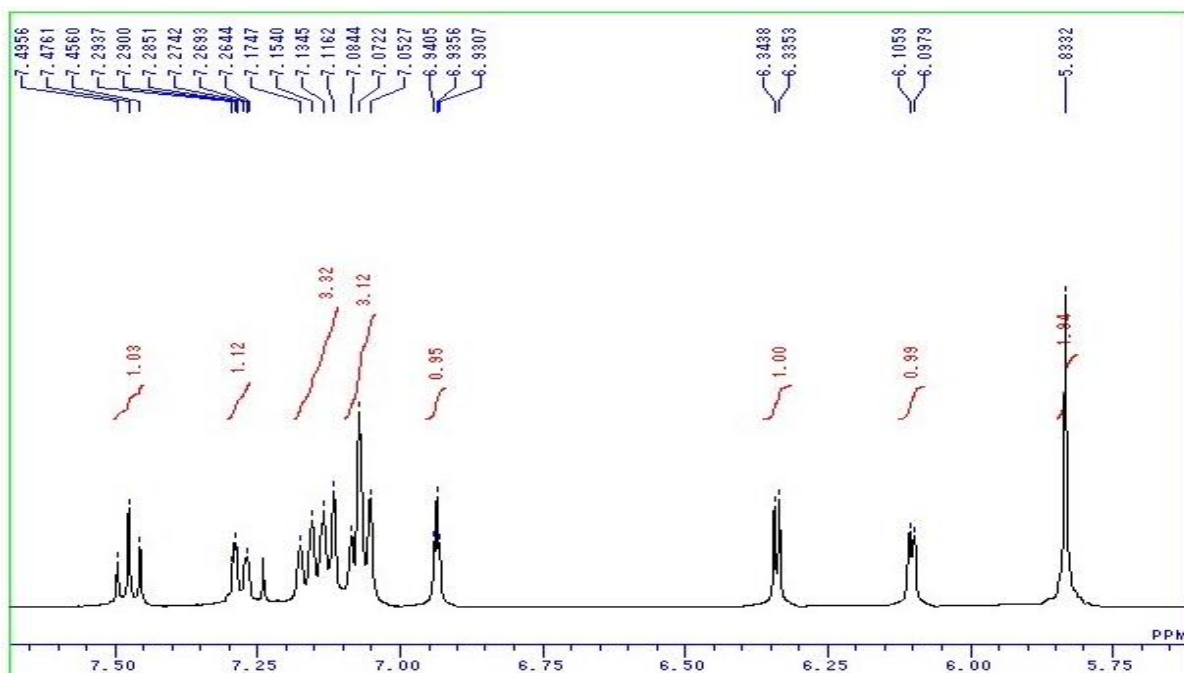

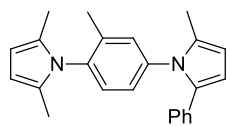

2,5-Dimethyl-1-[2-methyl-4-(2-methyl-5-phenyl-1H-pyrrol-1-yl)phenyl]-1H-pyrrole (22)

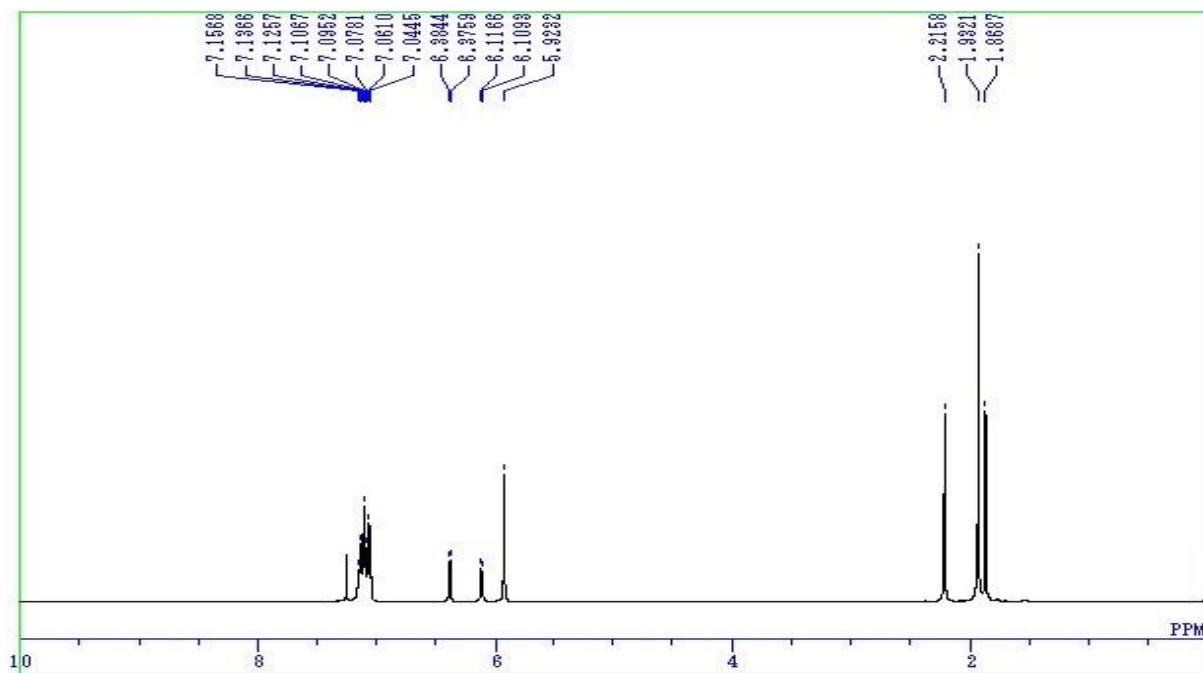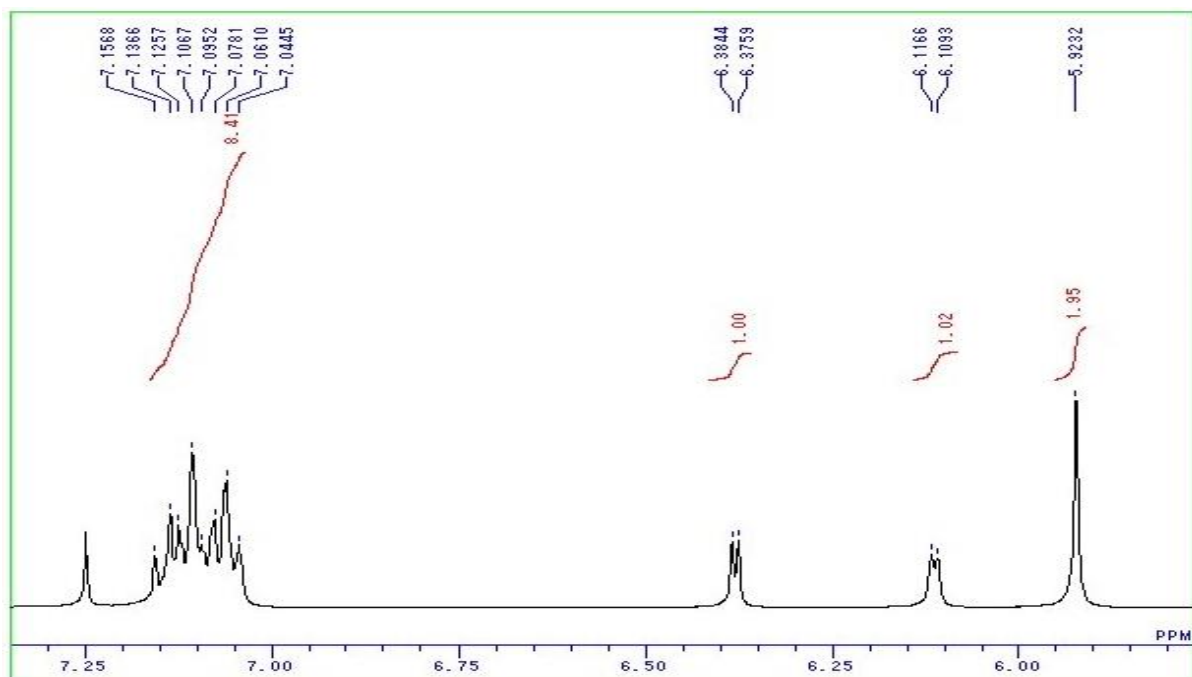



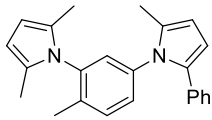

2,5-Dimethyl-1-[2-methyl-5-(2-methyl-5-phenyl-1H-pyrrol-1-yl)phenyl]-1H-pyrrole (**23**)

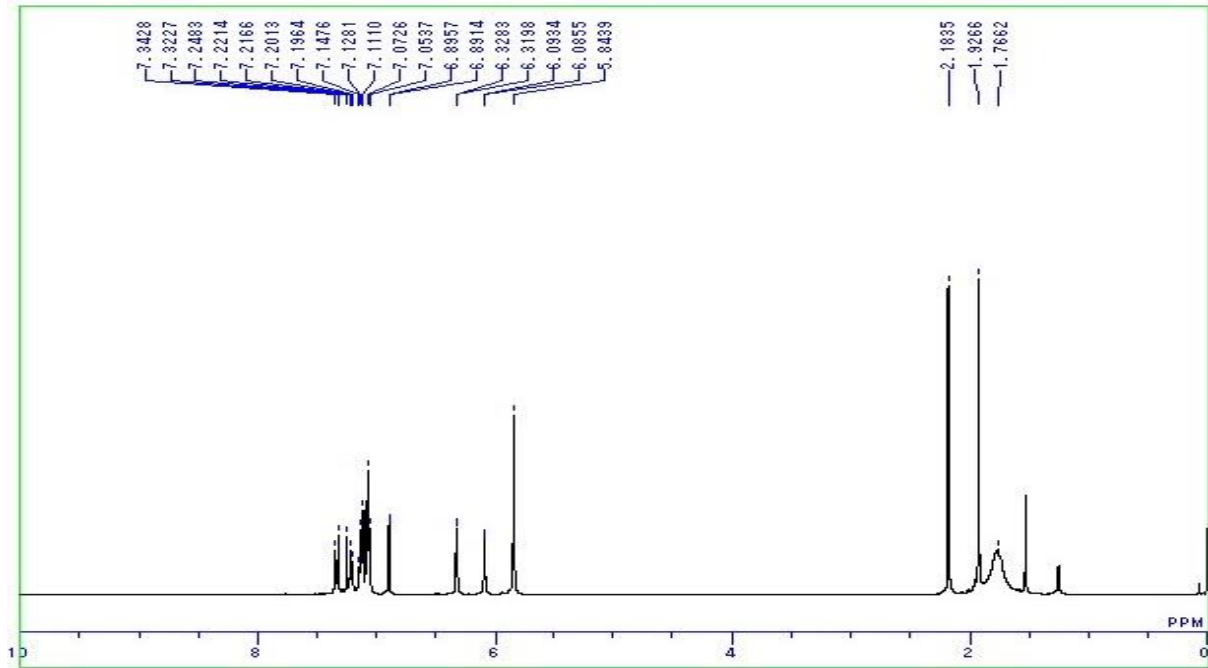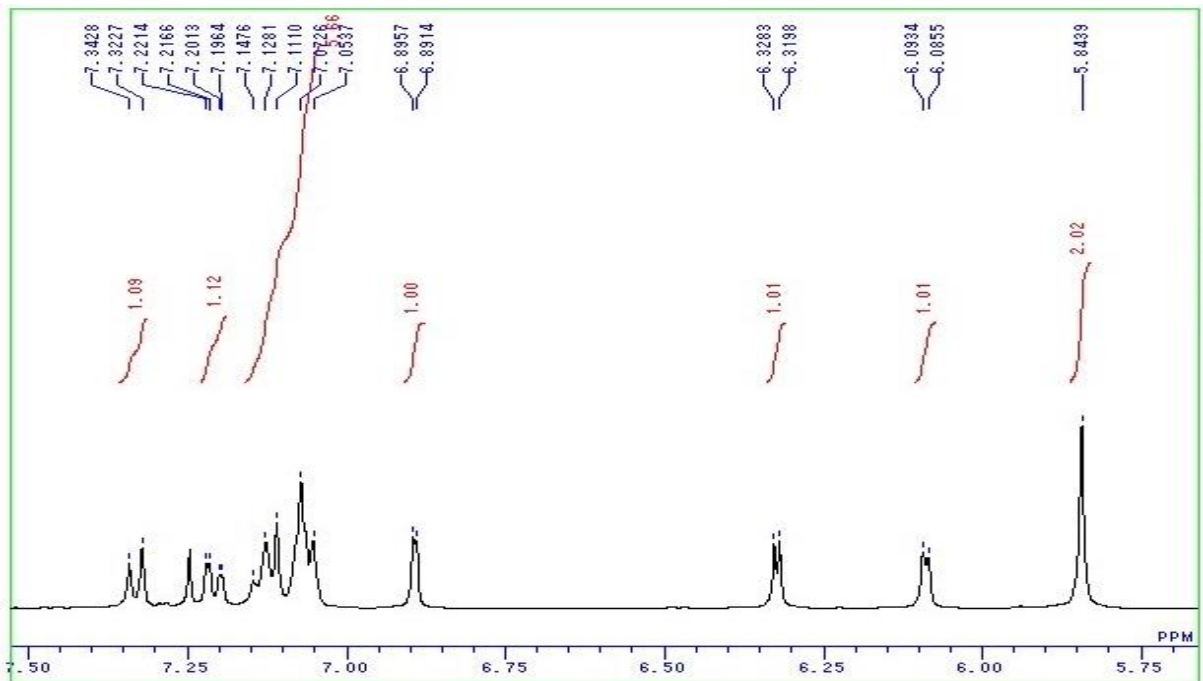

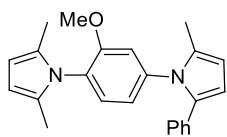

2,5-Dimethyl-1-[2-methoxy-4-(2-methyl-5-phenyl-1H-pyrrol-1-yl)phenyl]-1H-pyrrole (**24**)

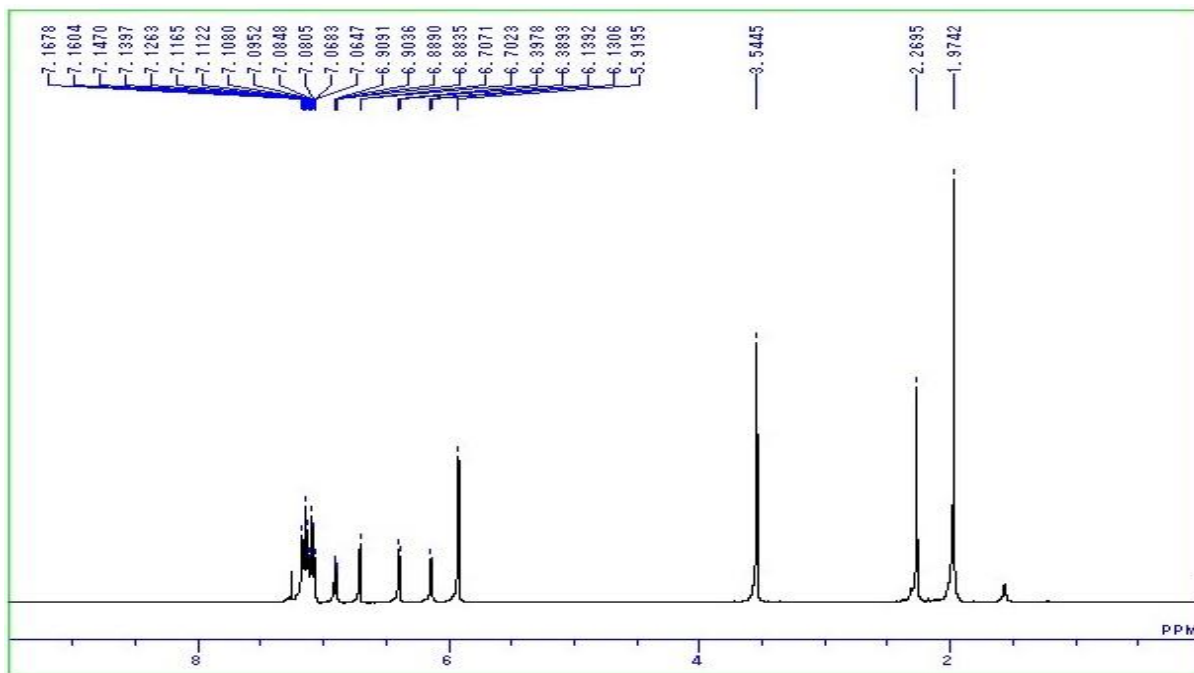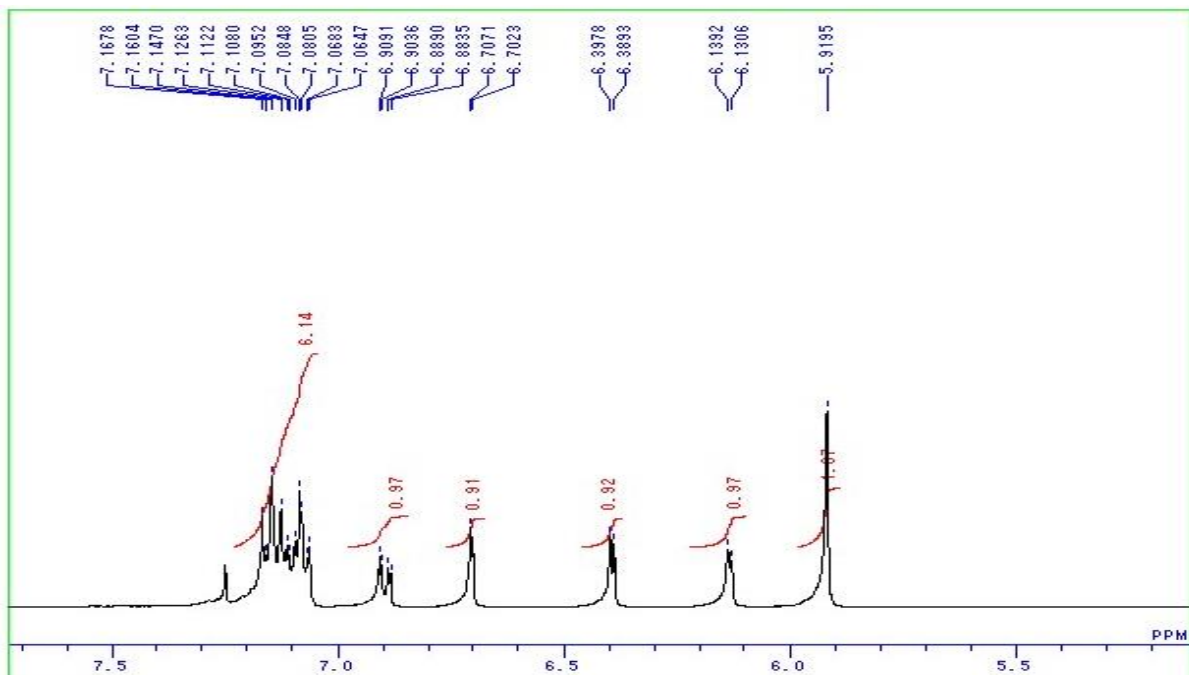

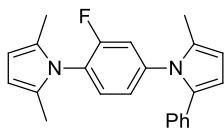

2,5-Dimethyl-1-[2-fluoro-4-(2-methyl-5-phenyl-1H-pyrrol-1-yl)phenyl]-1H-pyrrole (**25**)

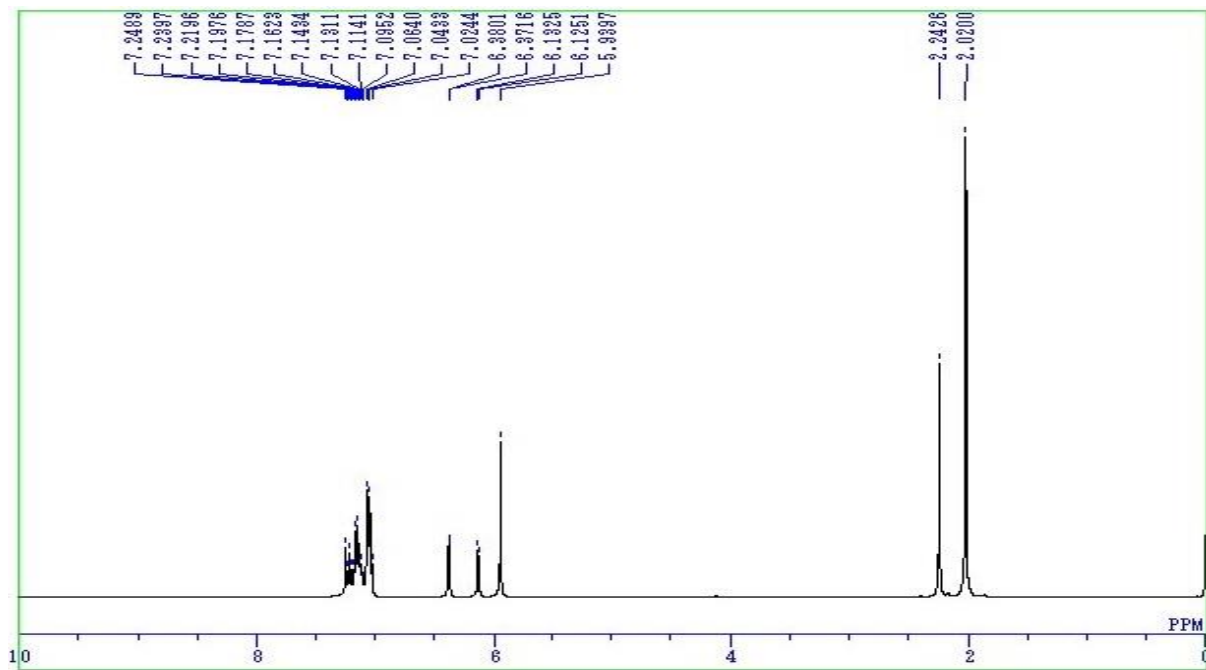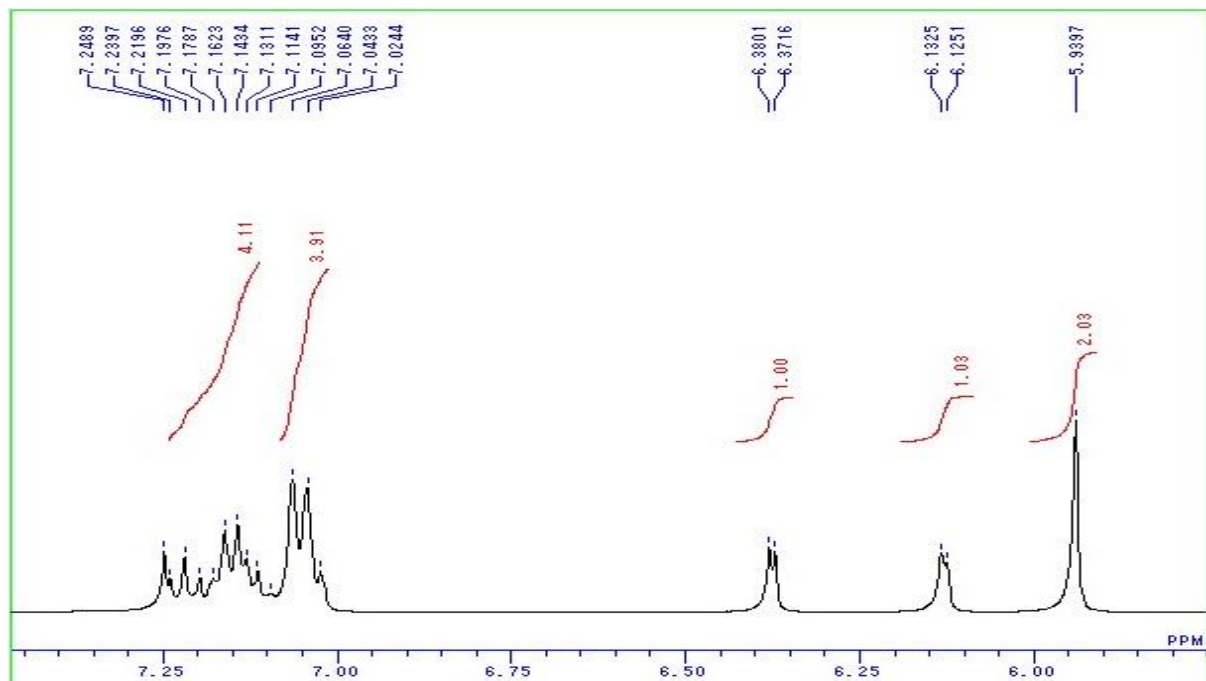

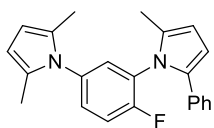

2,5-Dimethyl-1-[4-fluoro-3-(2-methyl-5-phenyl-1H-pyrrol-1-yl)phenyl]-1H-pyrrole (**26**)

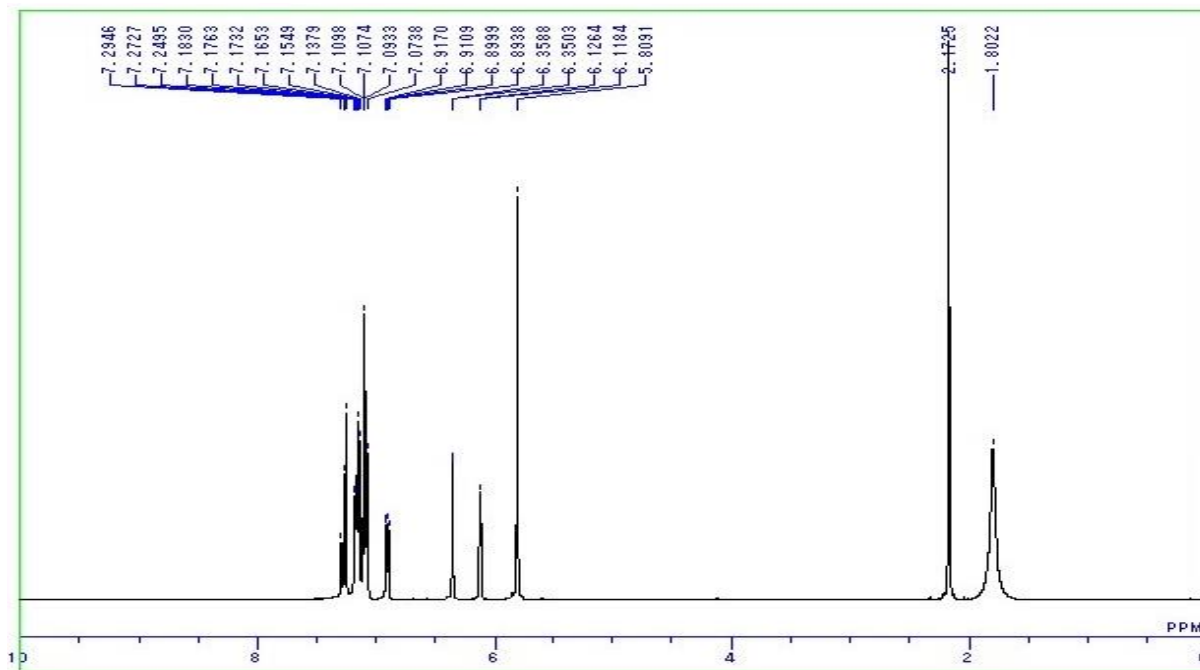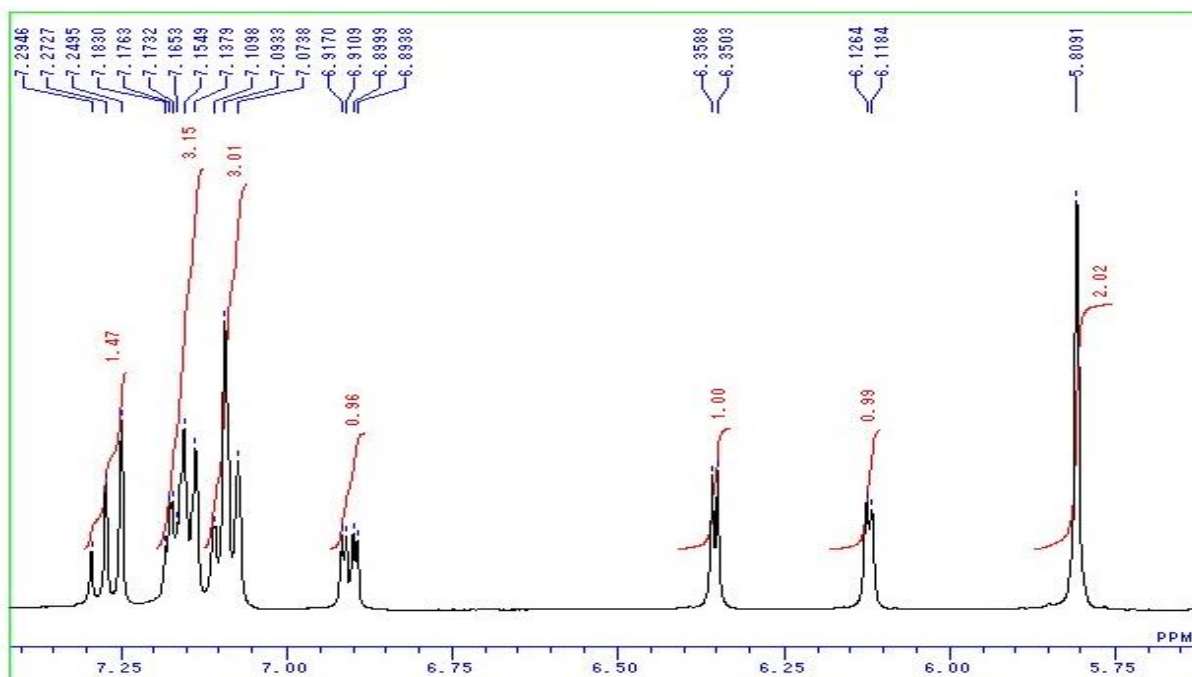

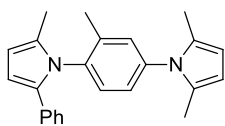

2,5-Dimethyl-1-[3-methyl-4-(2-methyl-5-phenyl-1H-pyrrol-1-yl)phenyl]-1H-pyrrole (27)

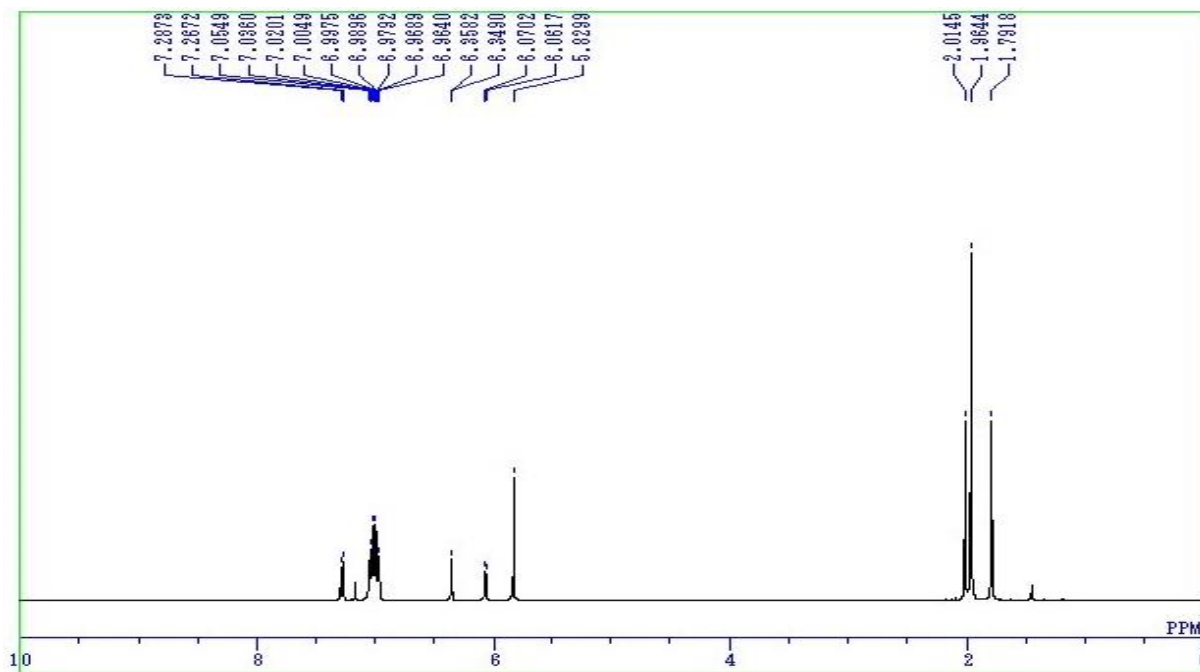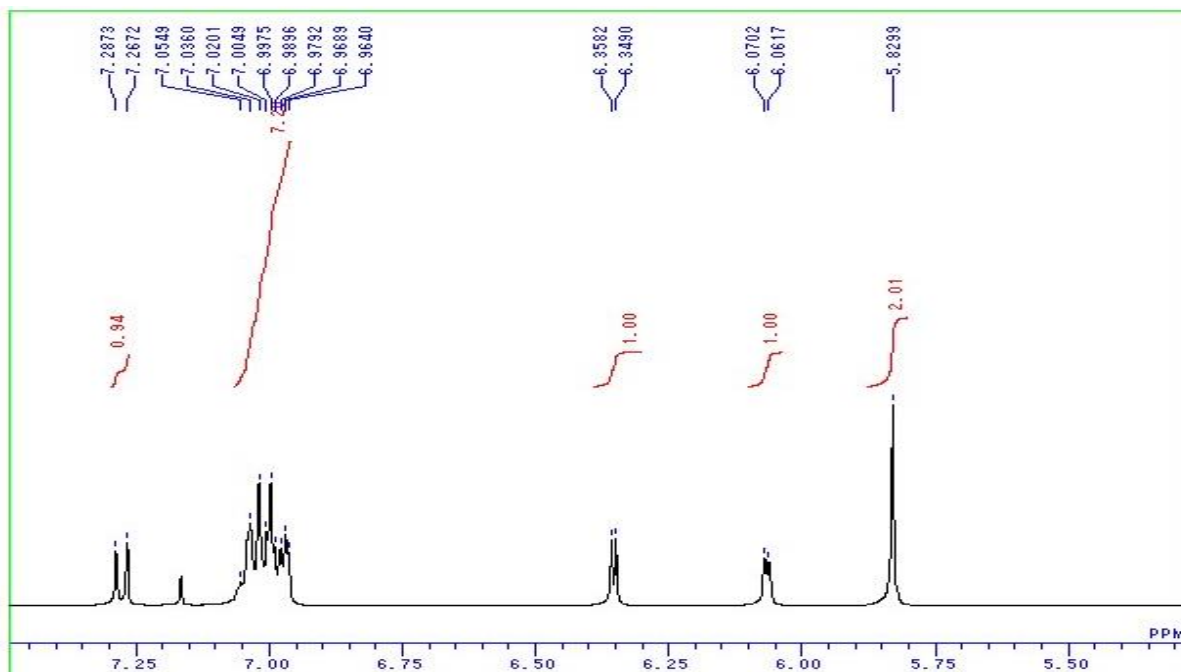

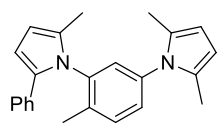

2,5-Dimethyl-1-[4-methyl-3-(2-methyl-5-phenyl-1H-pyrrol-1-yl)phenyl]-1H-pyrrole (**28**)

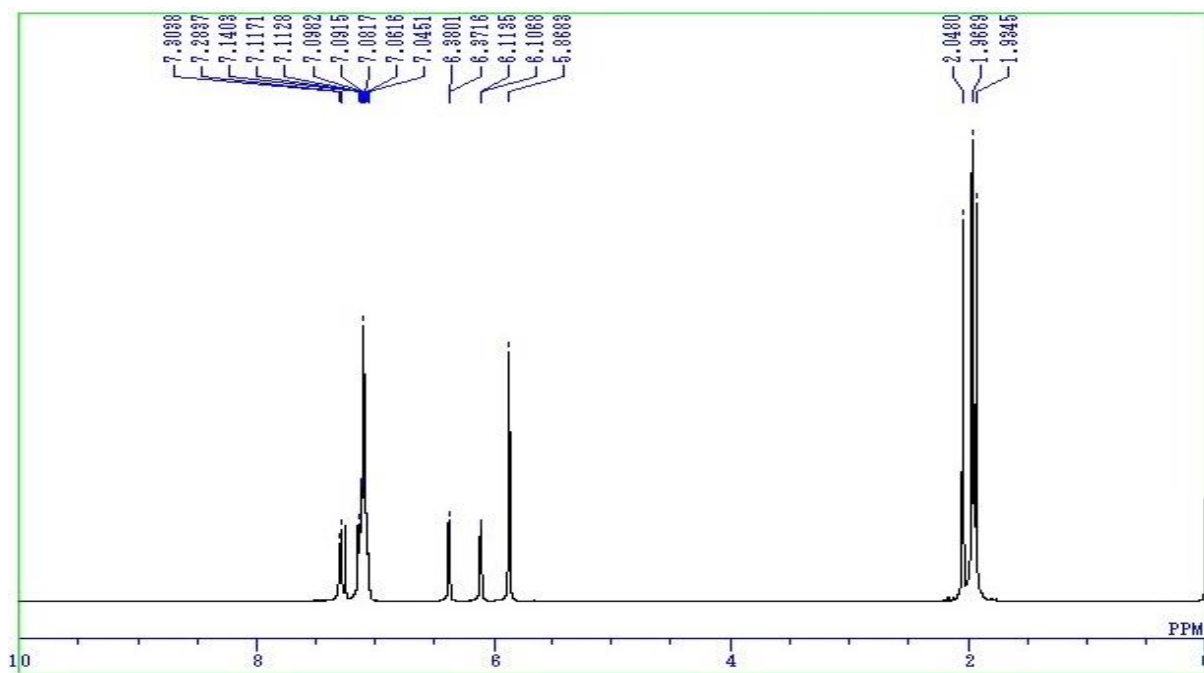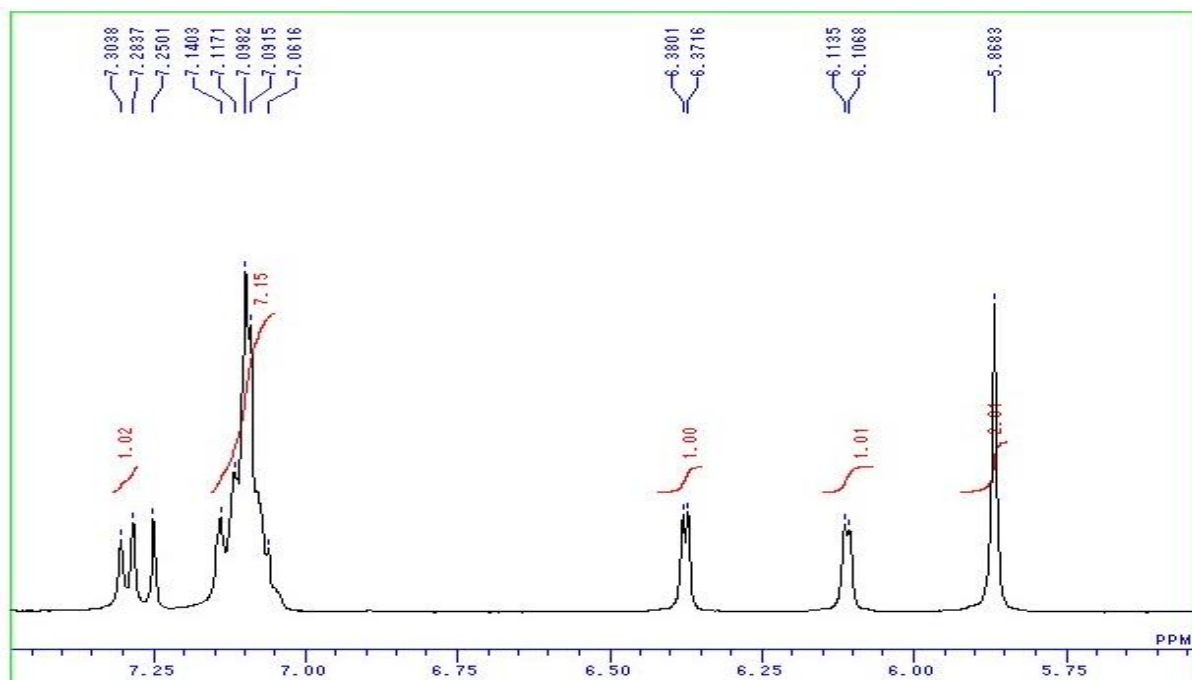

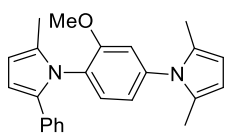

2,5-Dimethyl-1-[3-methoxy-4-(2-methyl-5-phenyl-1H-pyrrol-1-yl)phenyl]-1H-pyrrole (**29**)

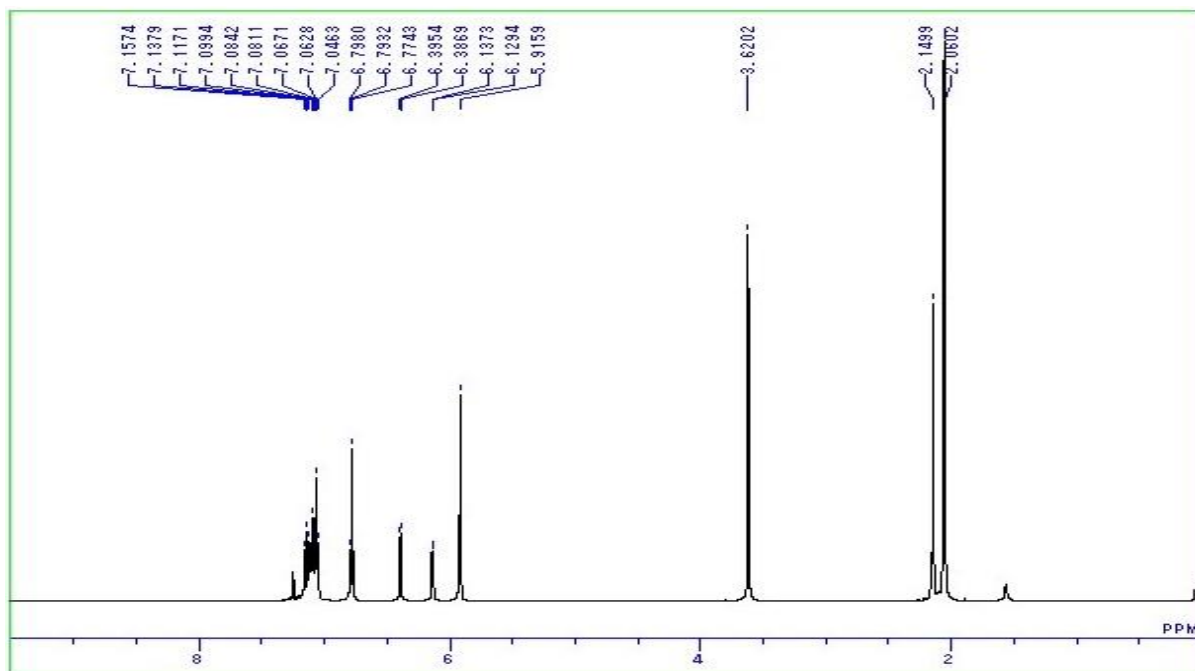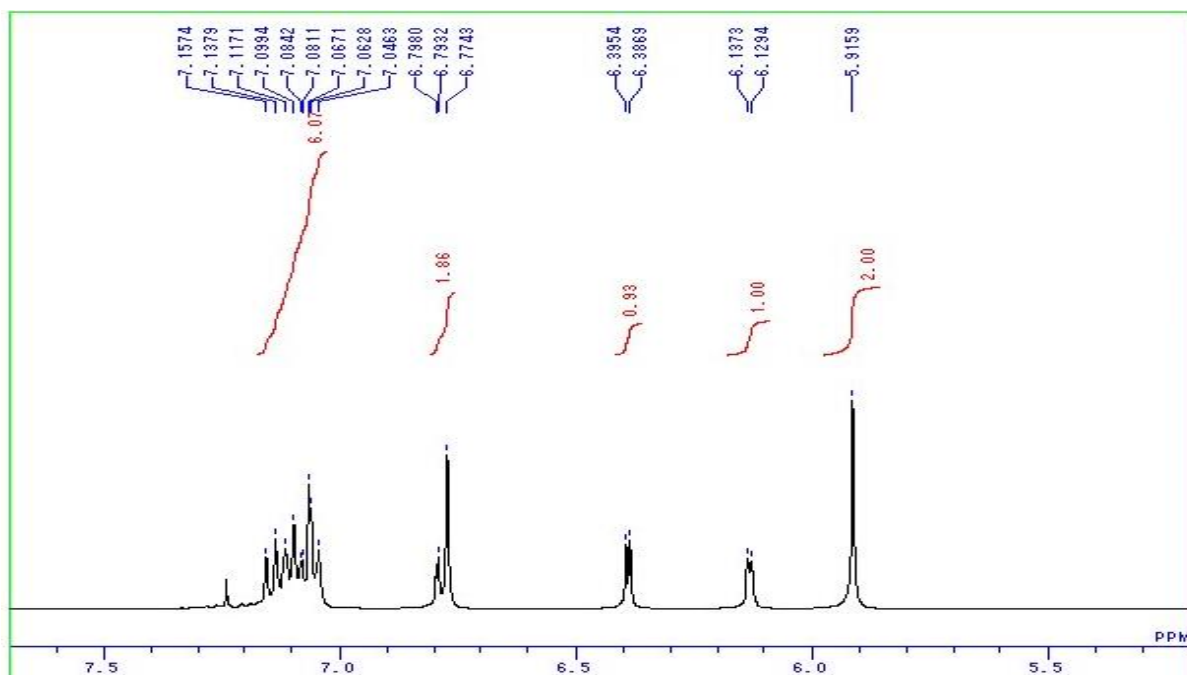

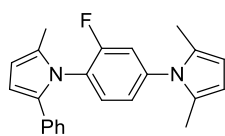

2,5-Dimethyl-1-[3-fluoro-4-(2-methyl-5-phenyl-1H-pyrrol-1-yl)phenyl]-1H-pyrrole (**30**)

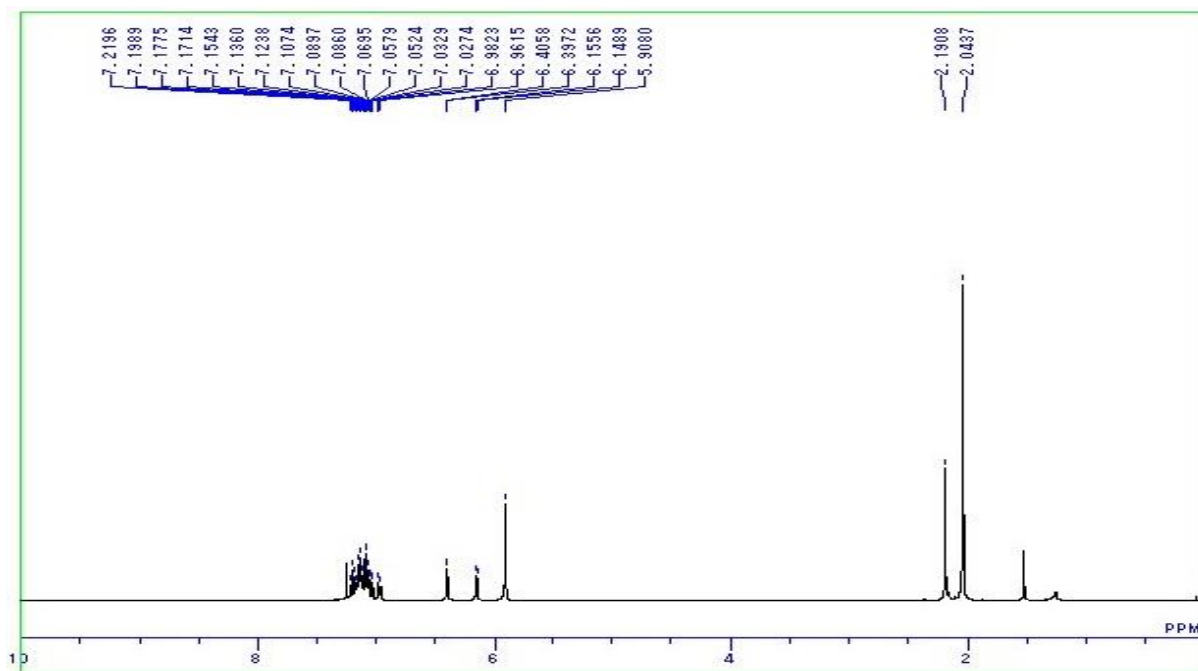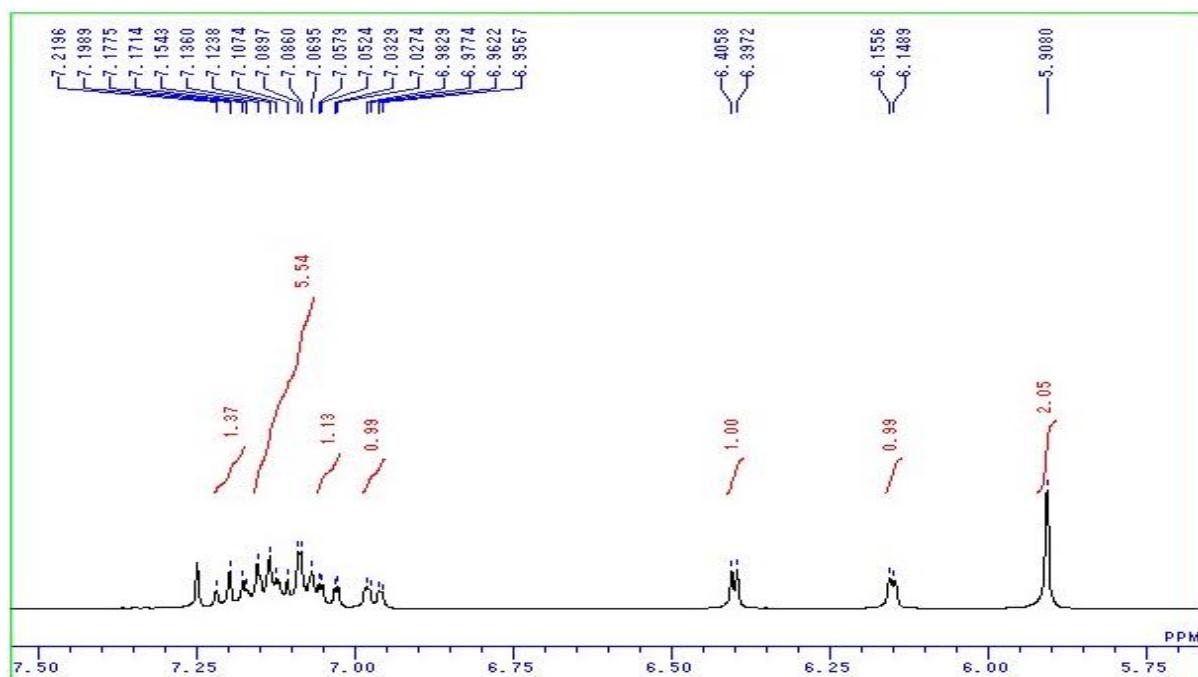



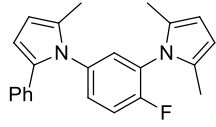

2,5-Dimethyl-1-[2-fluoro-5-(2-methyl-5-phenyl-1H-pyrrol-1-yl)phenyl]-1H-pyrrole (**31**)

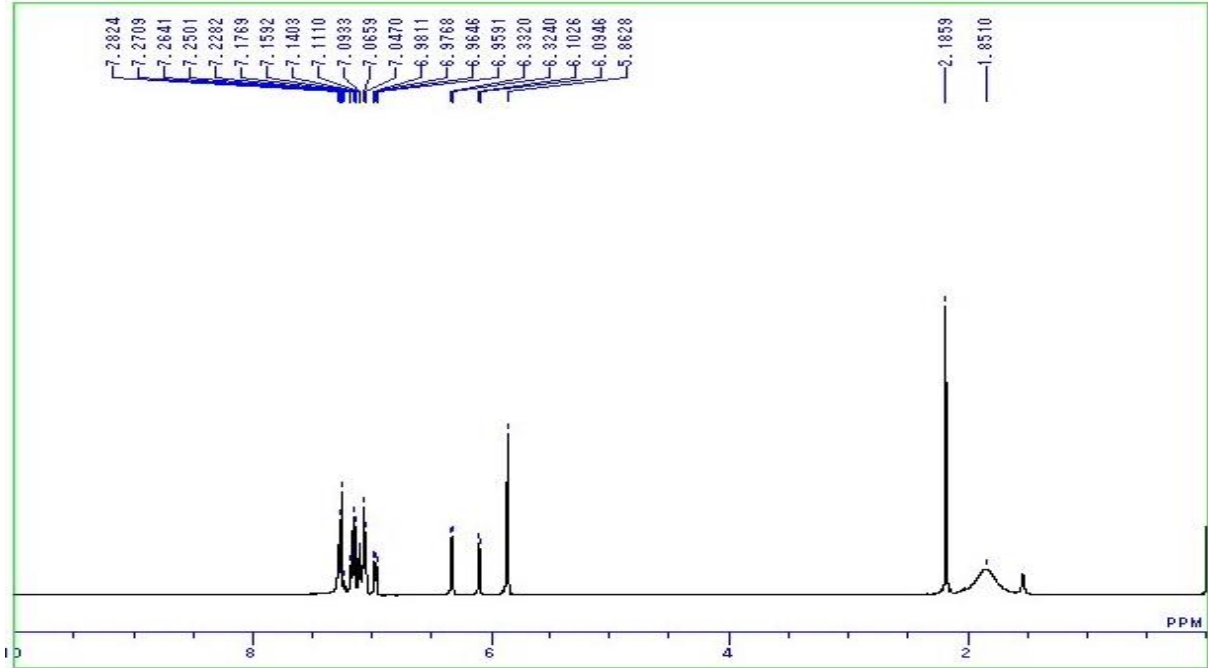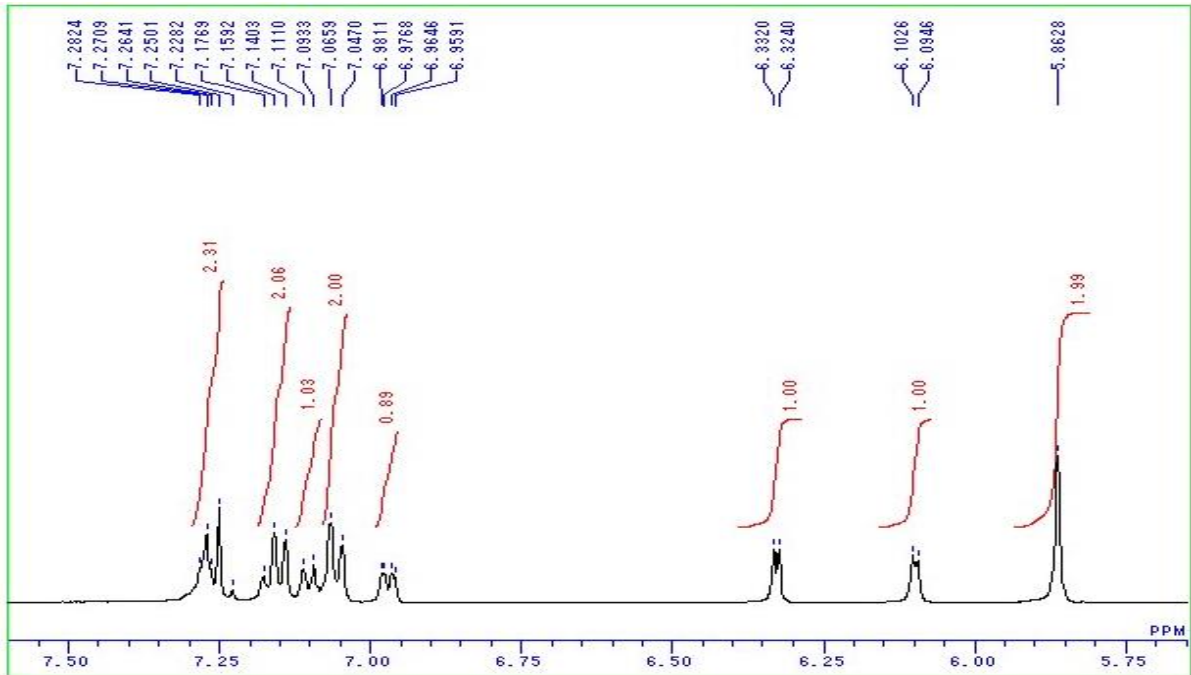

<sup>13</sup>C NMR of unsymmetrical  
((1*H*-pyrrol-1-yl)phenyl)-1*H*-pyrrole derivatives

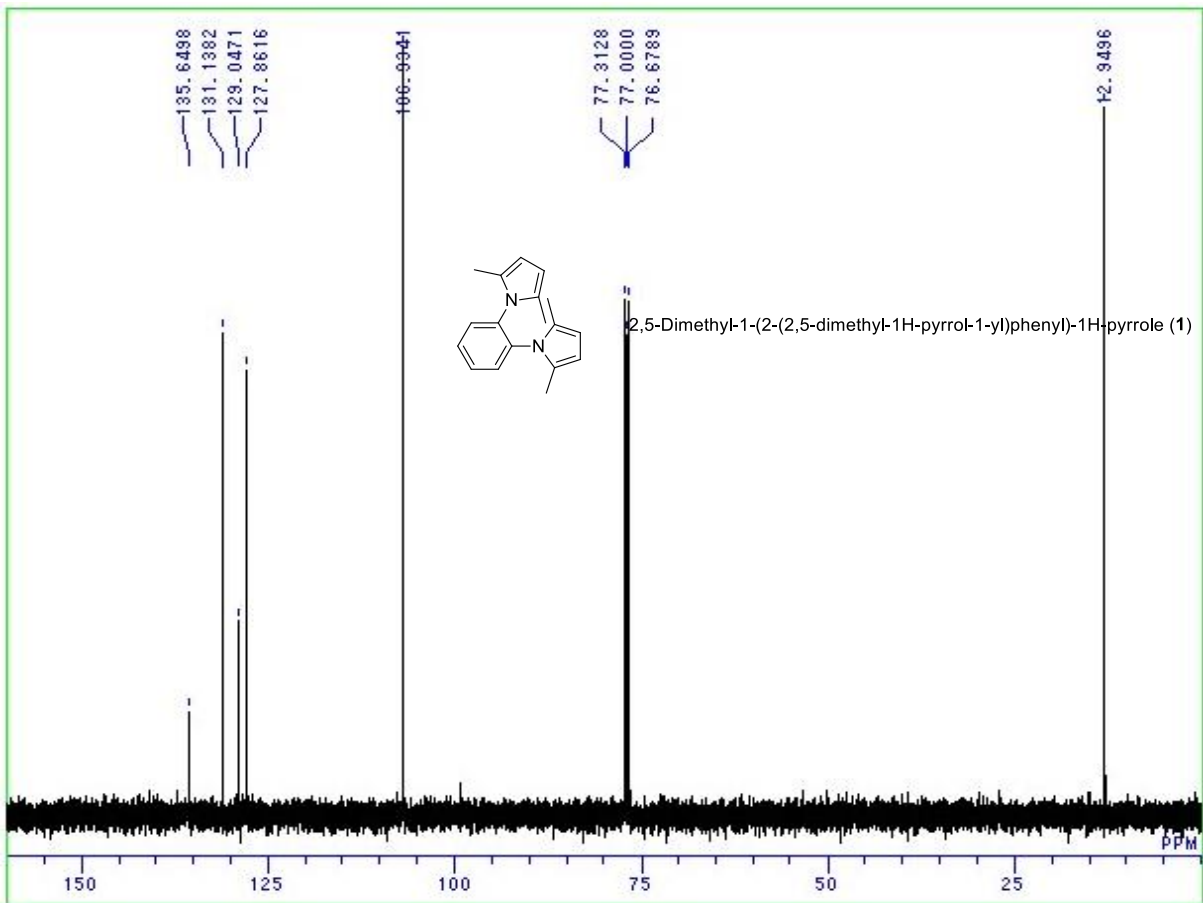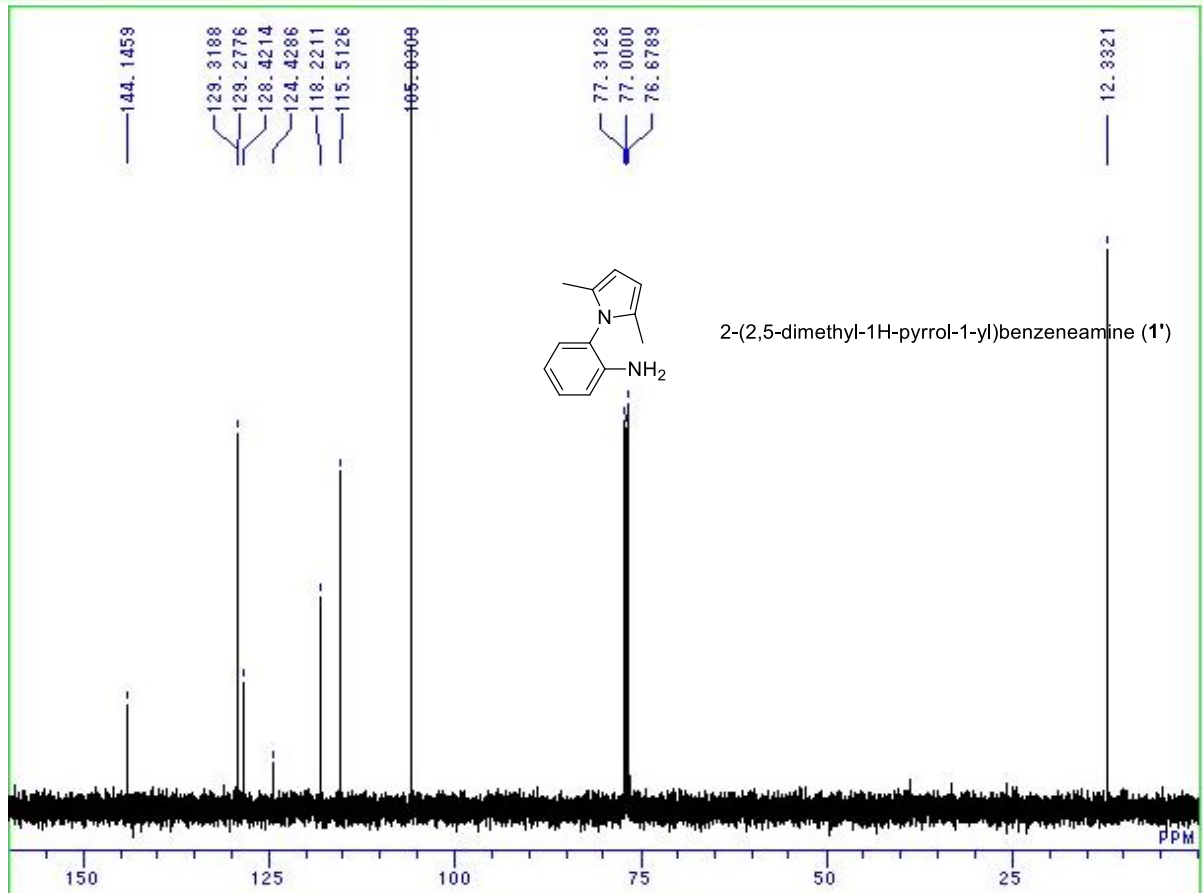

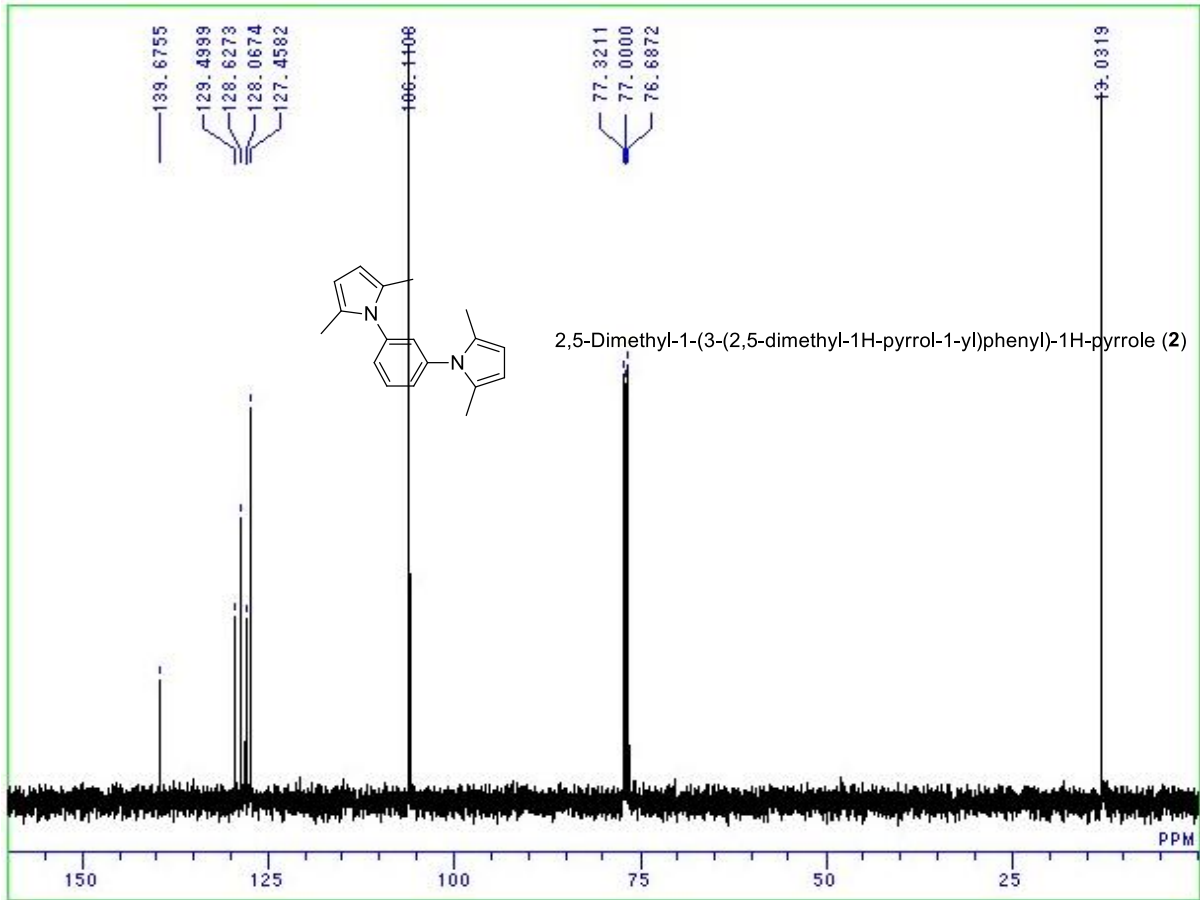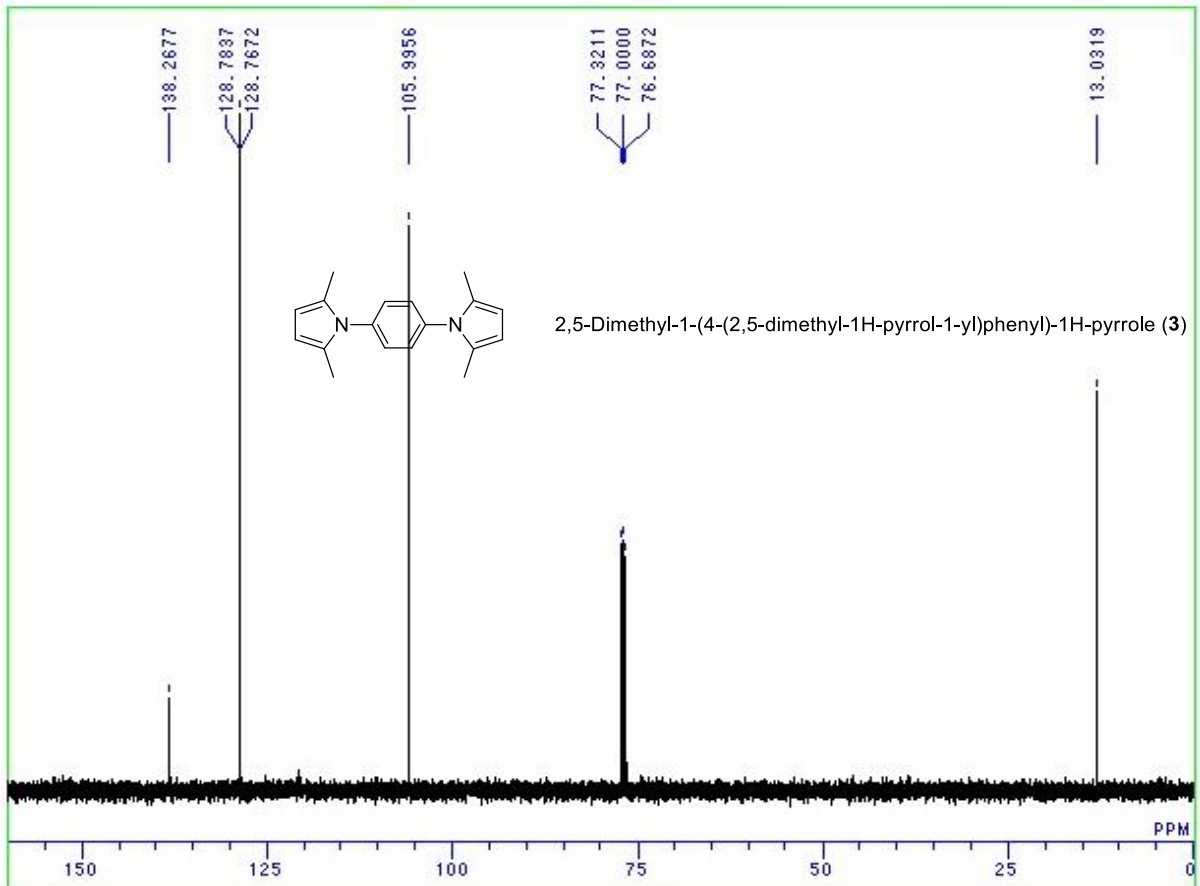

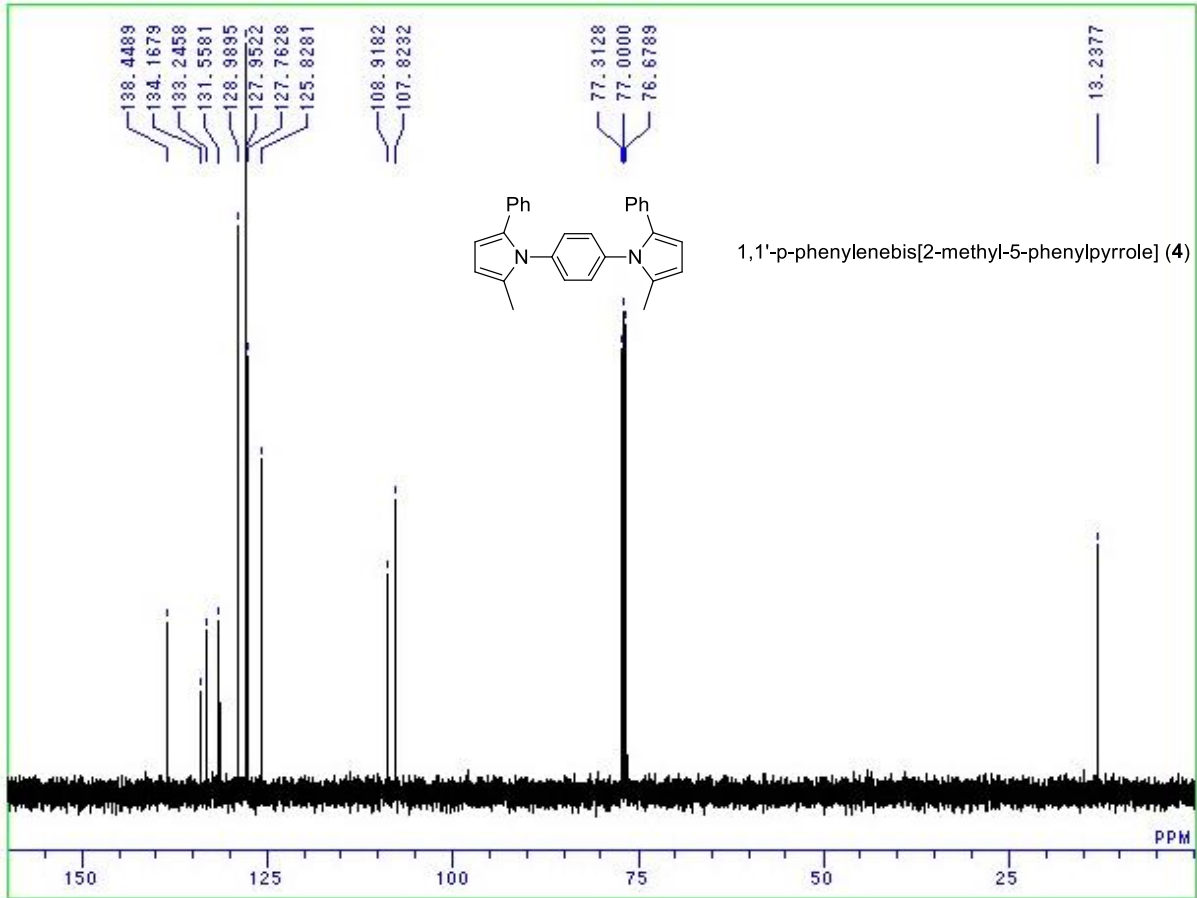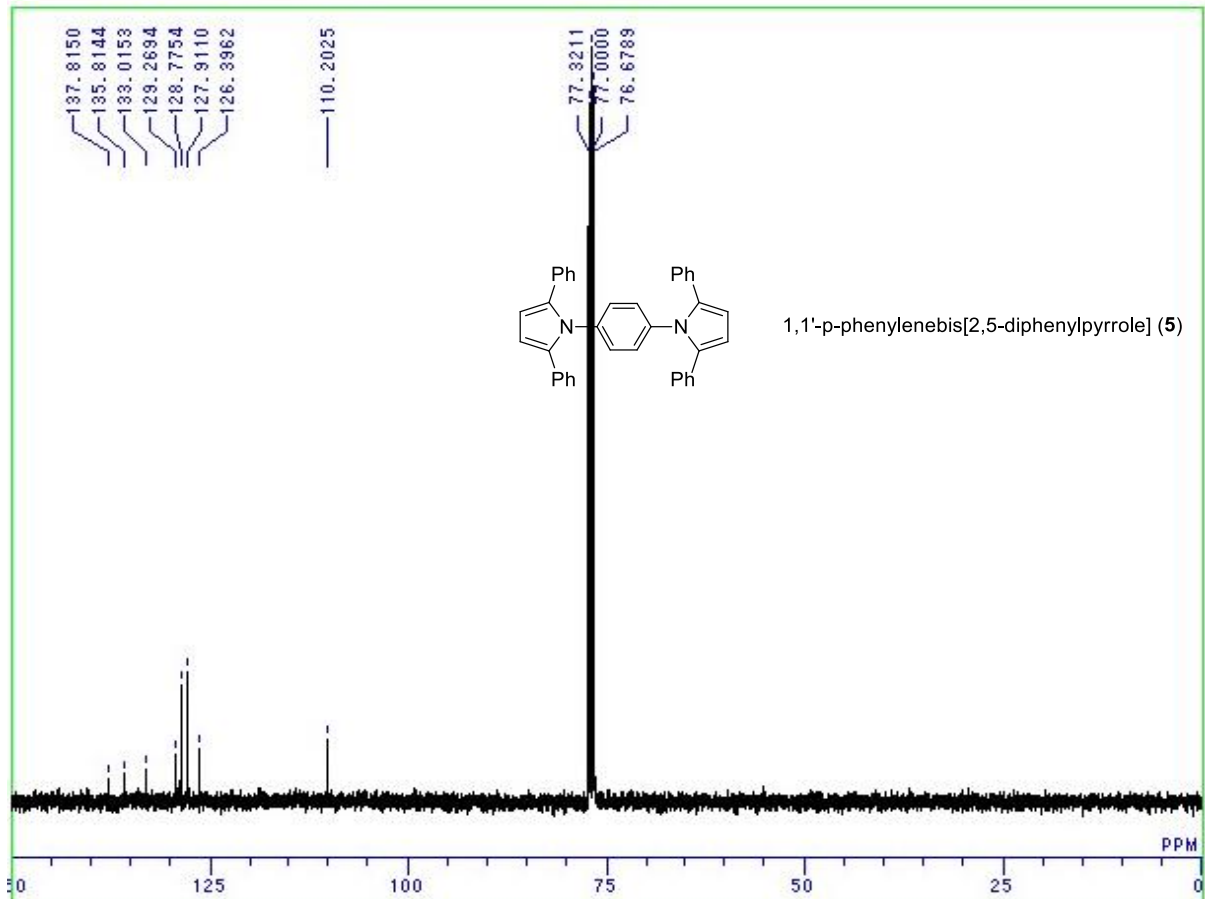

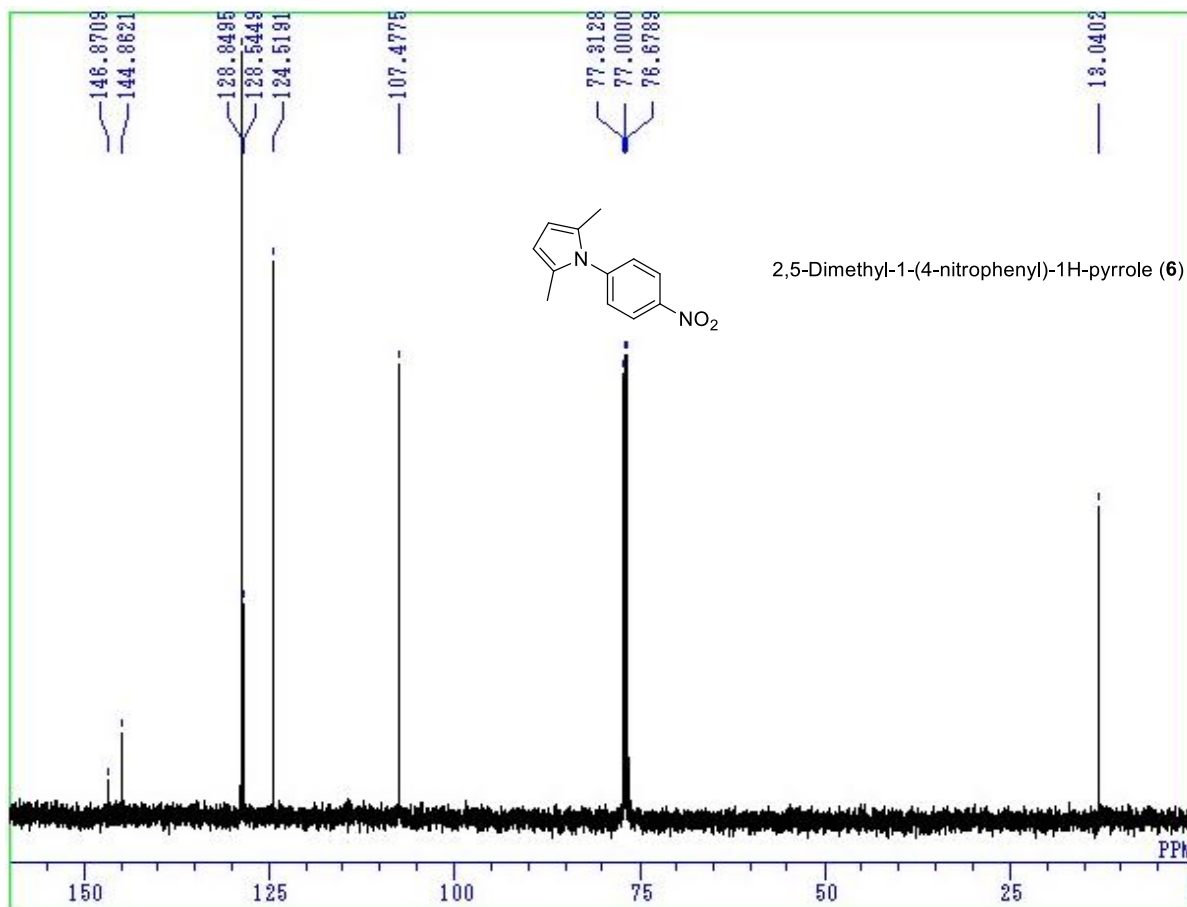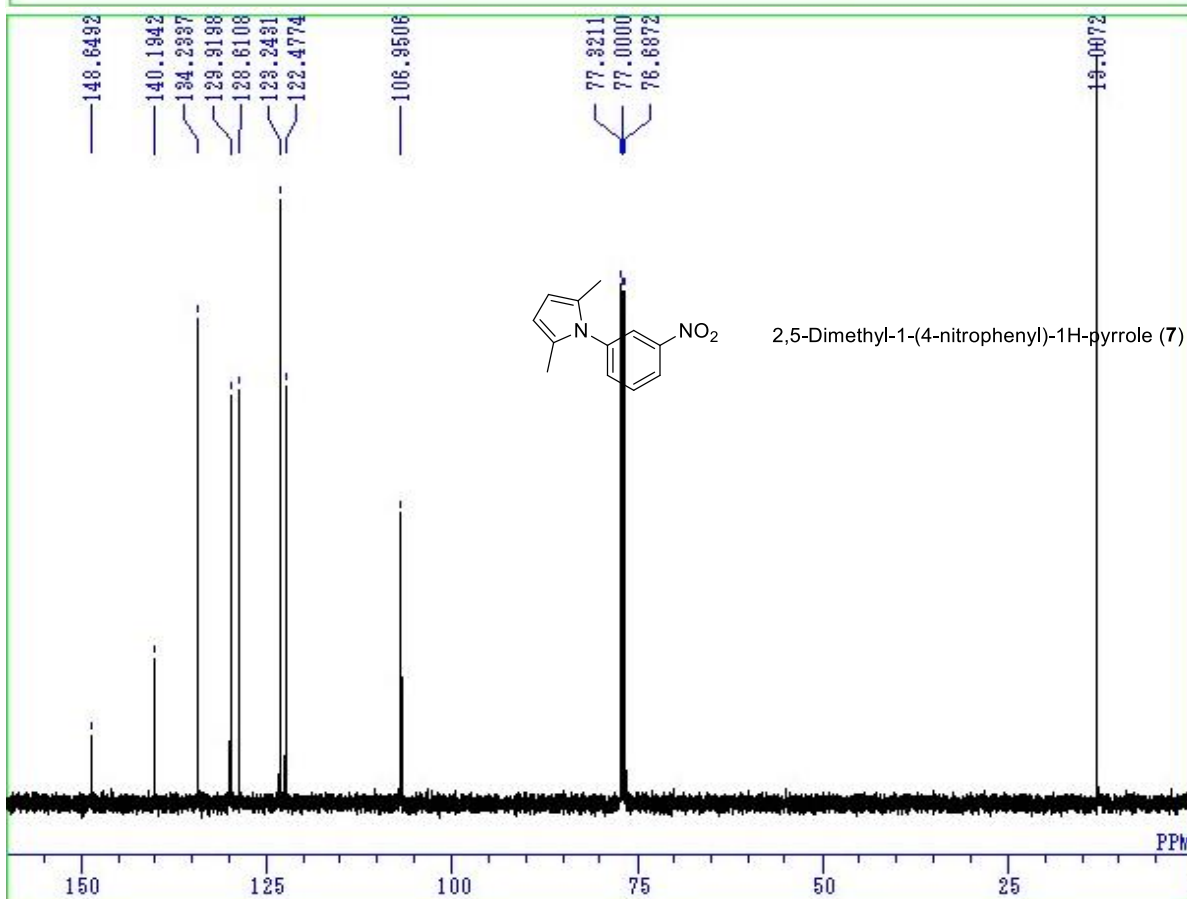

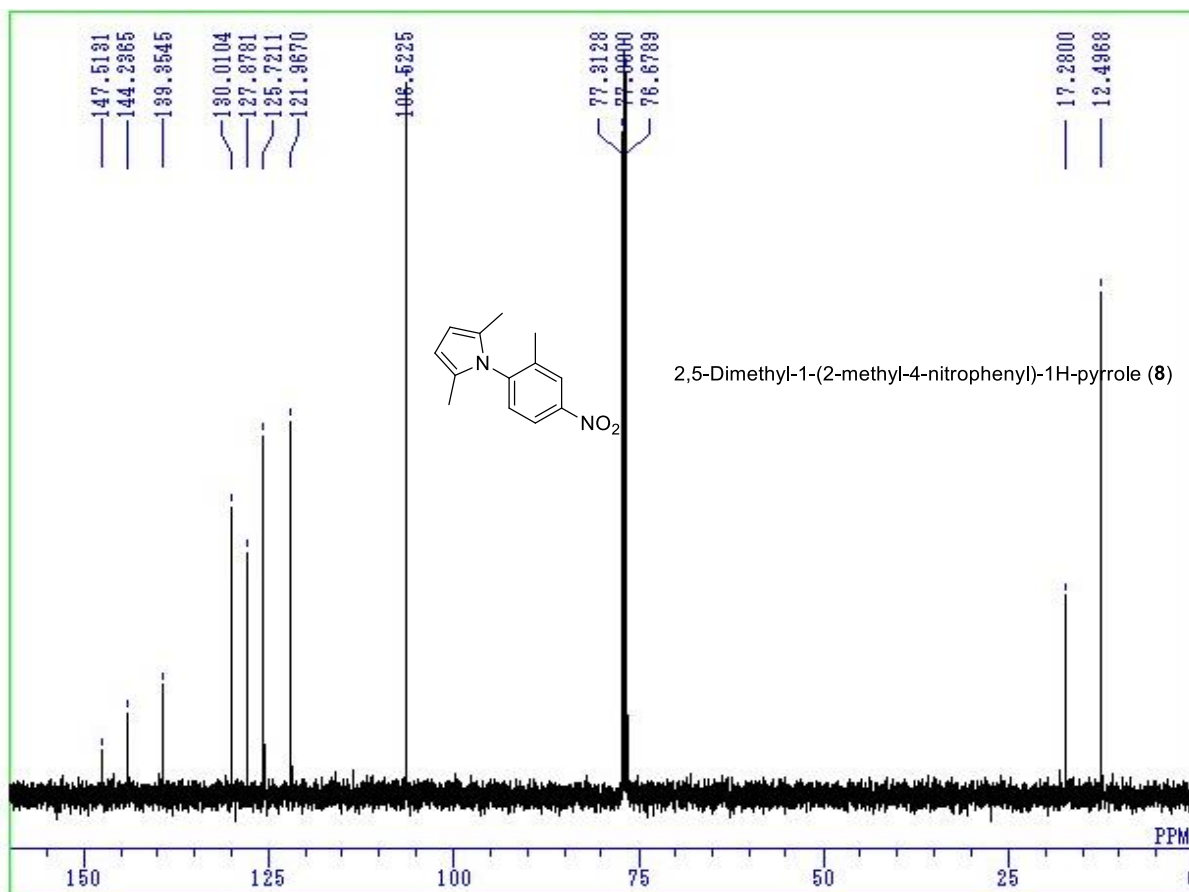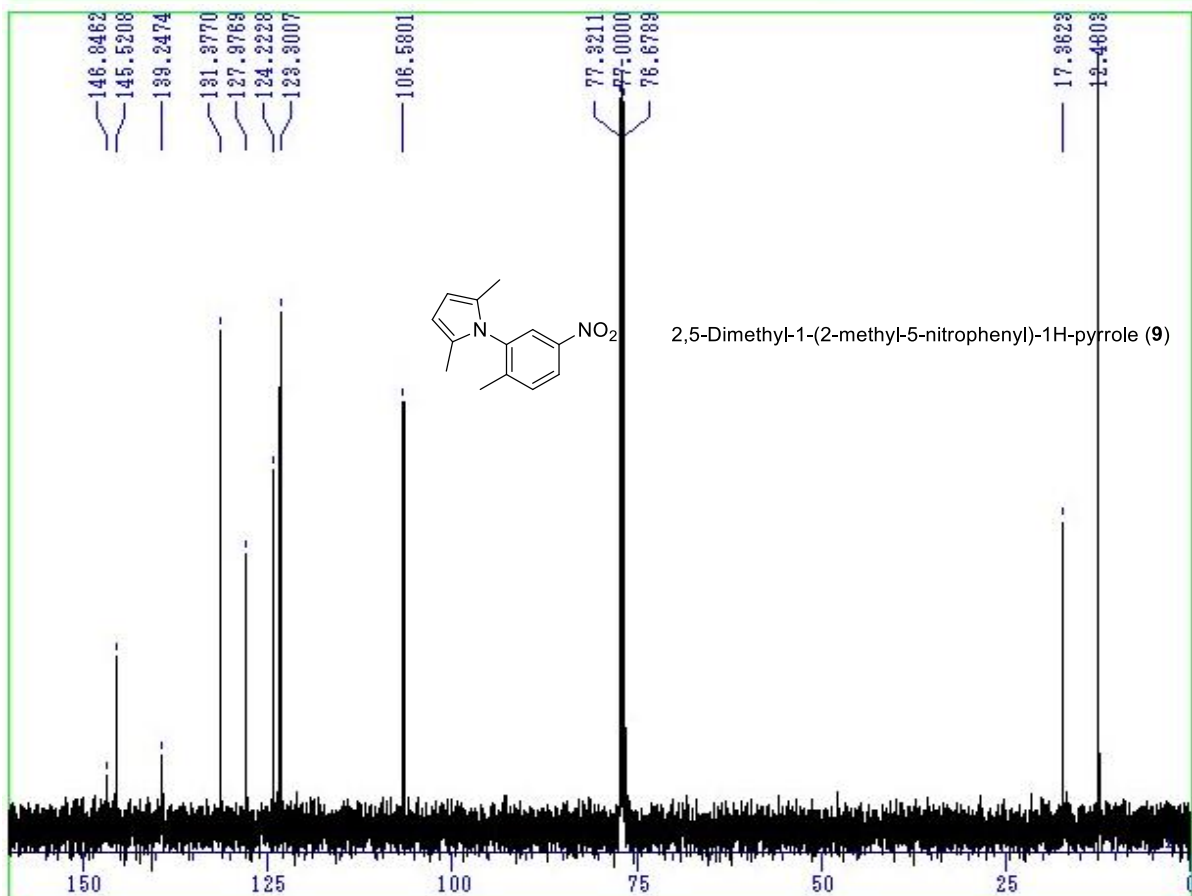

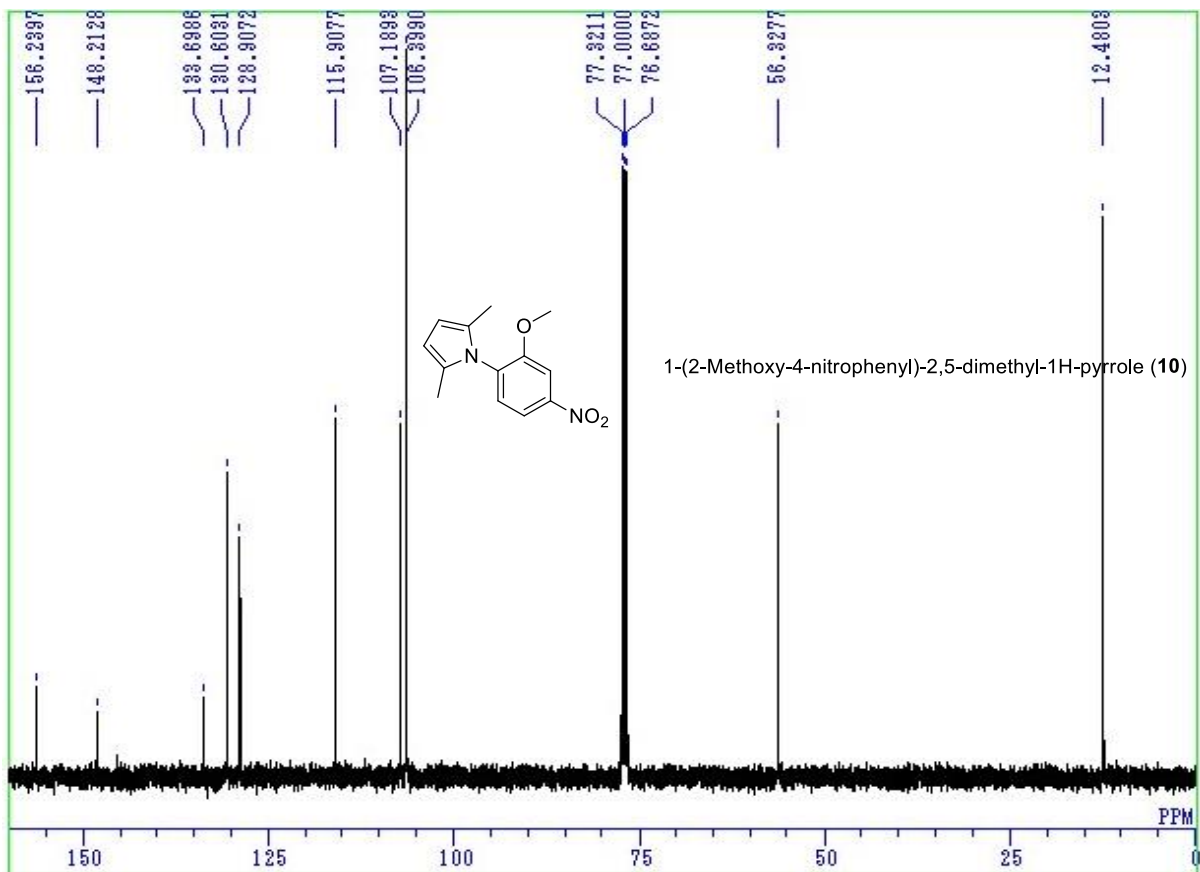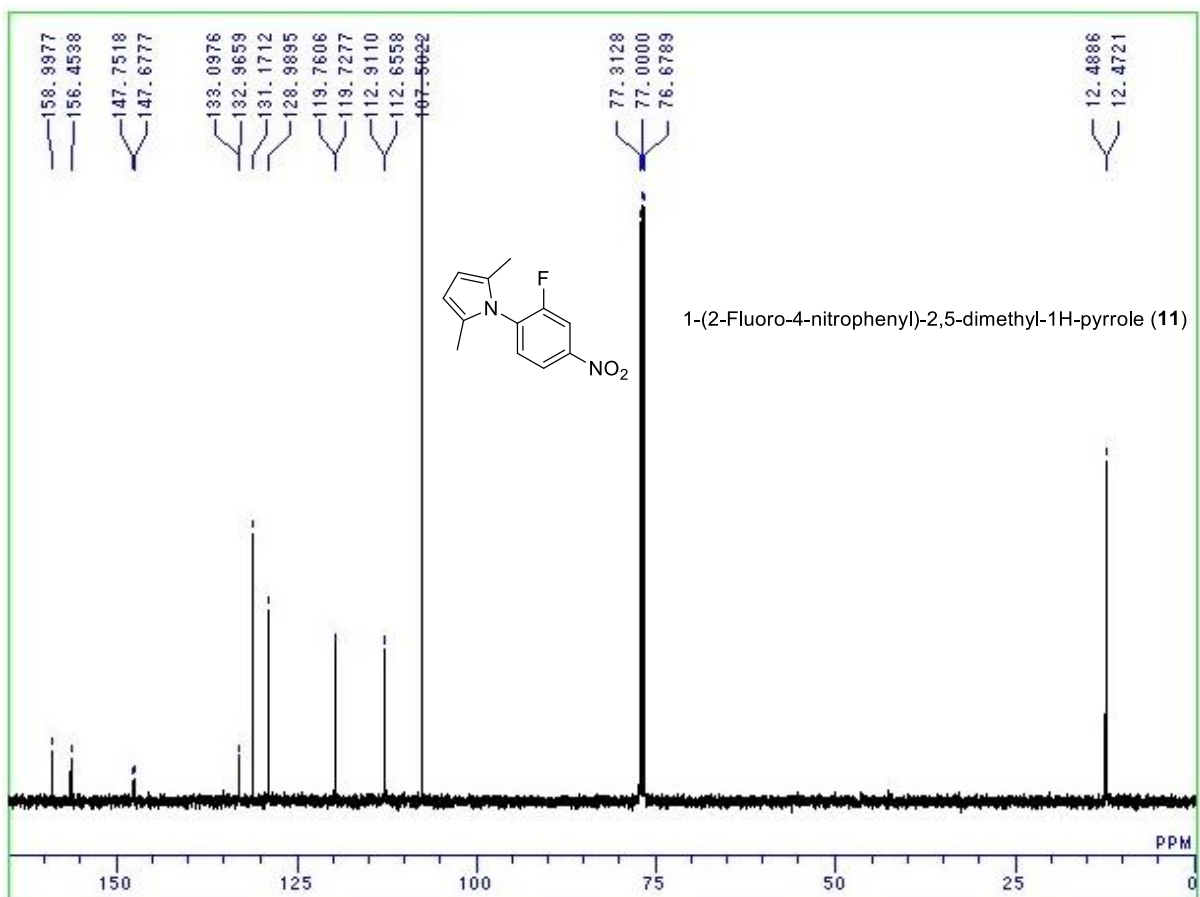



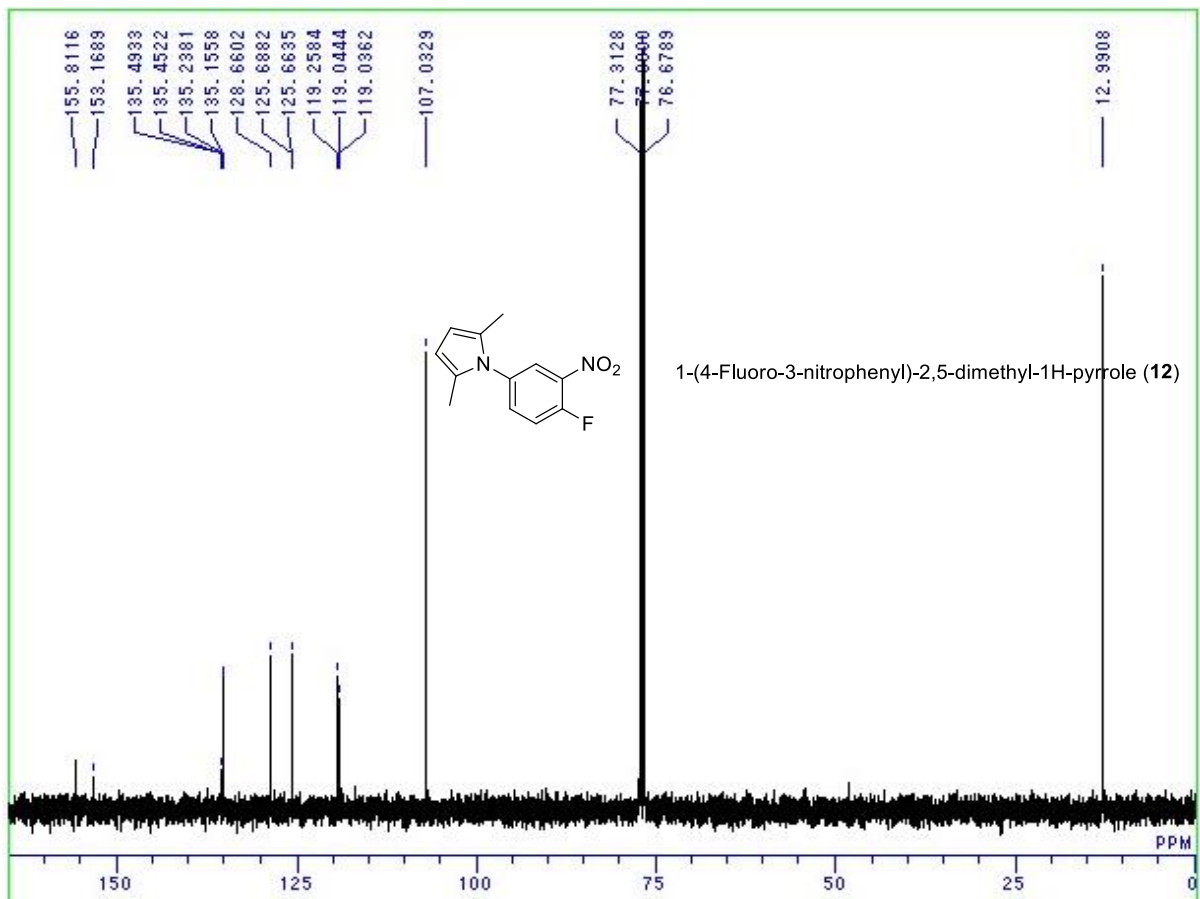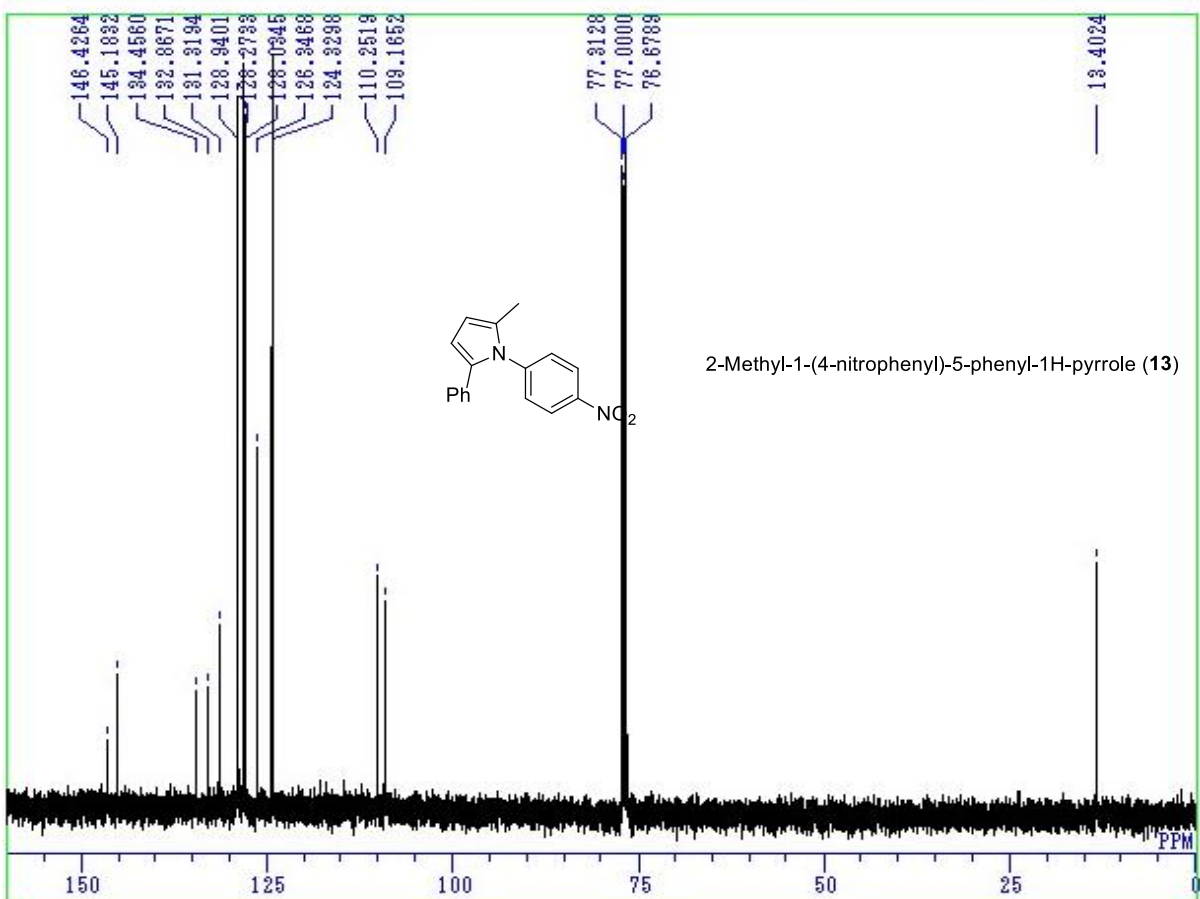

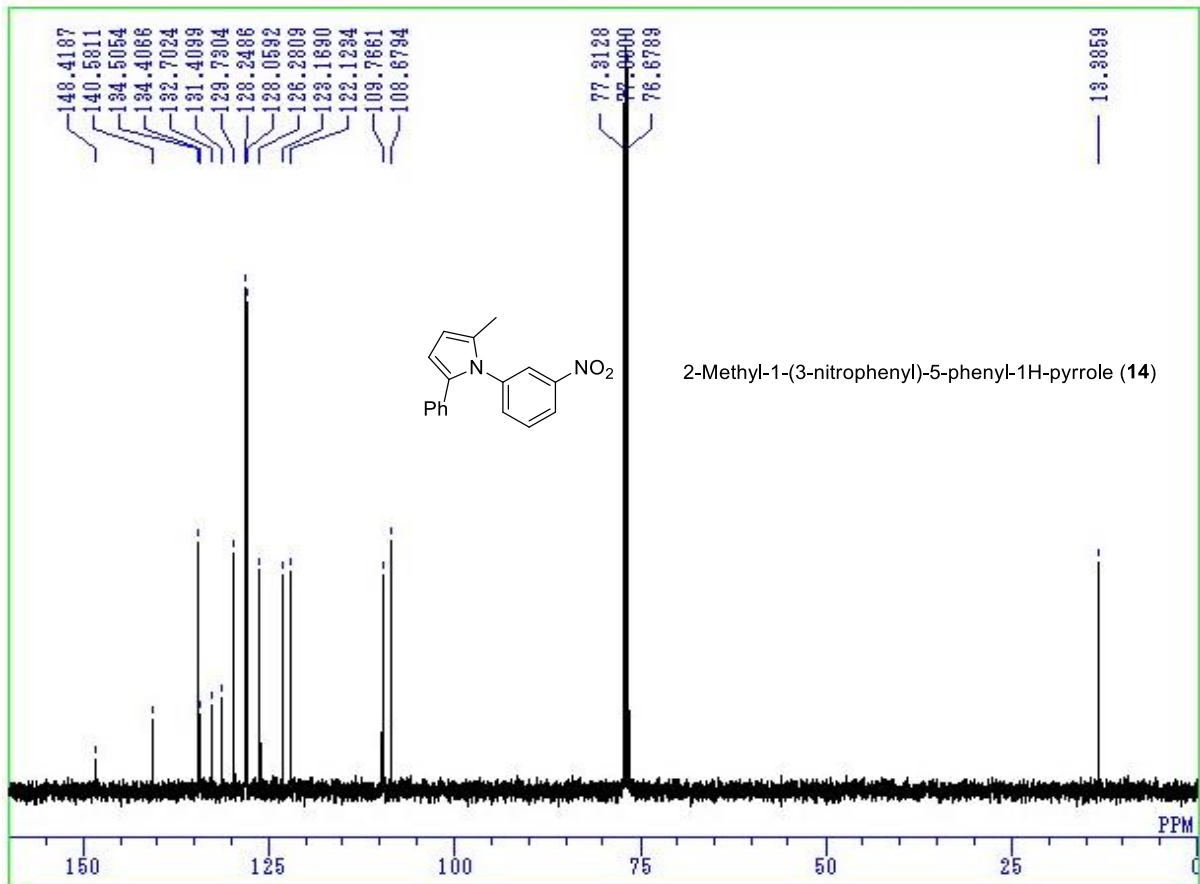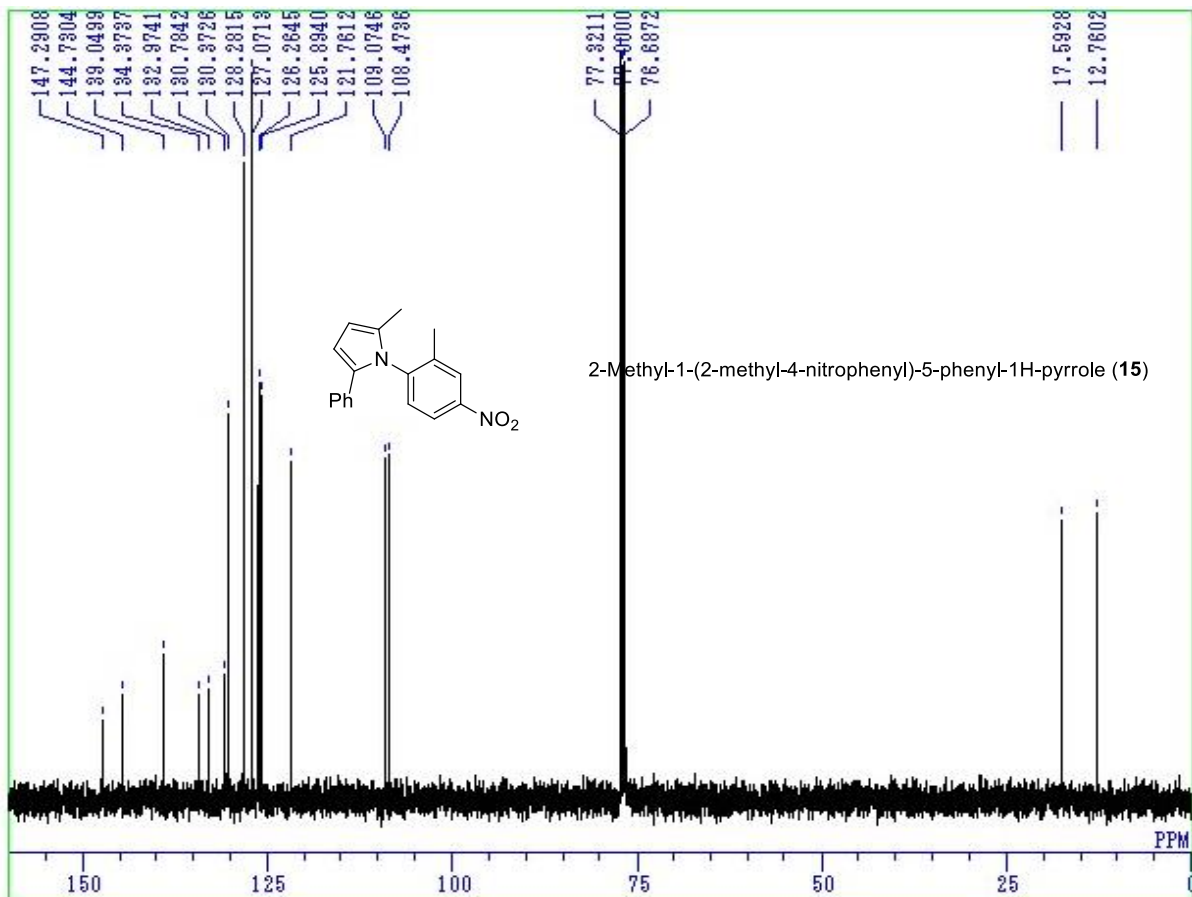

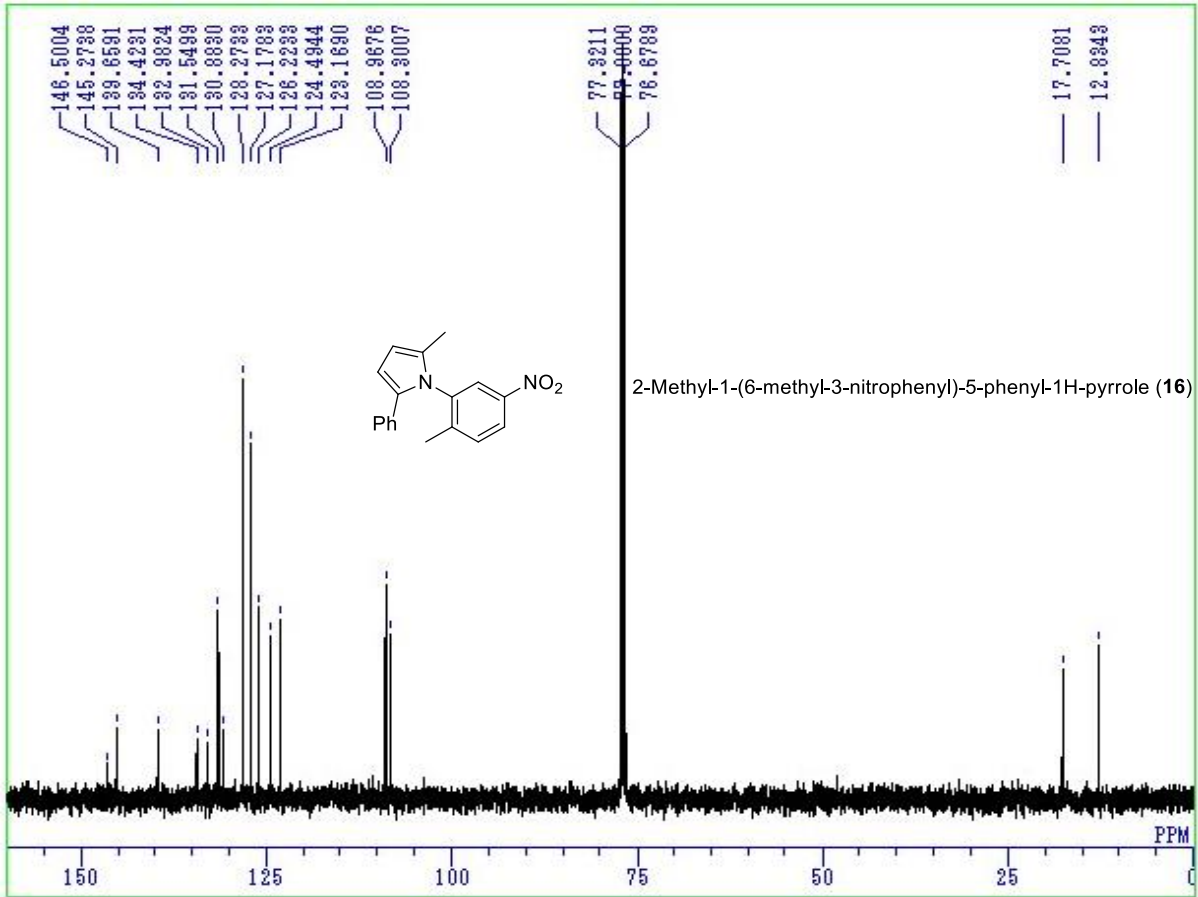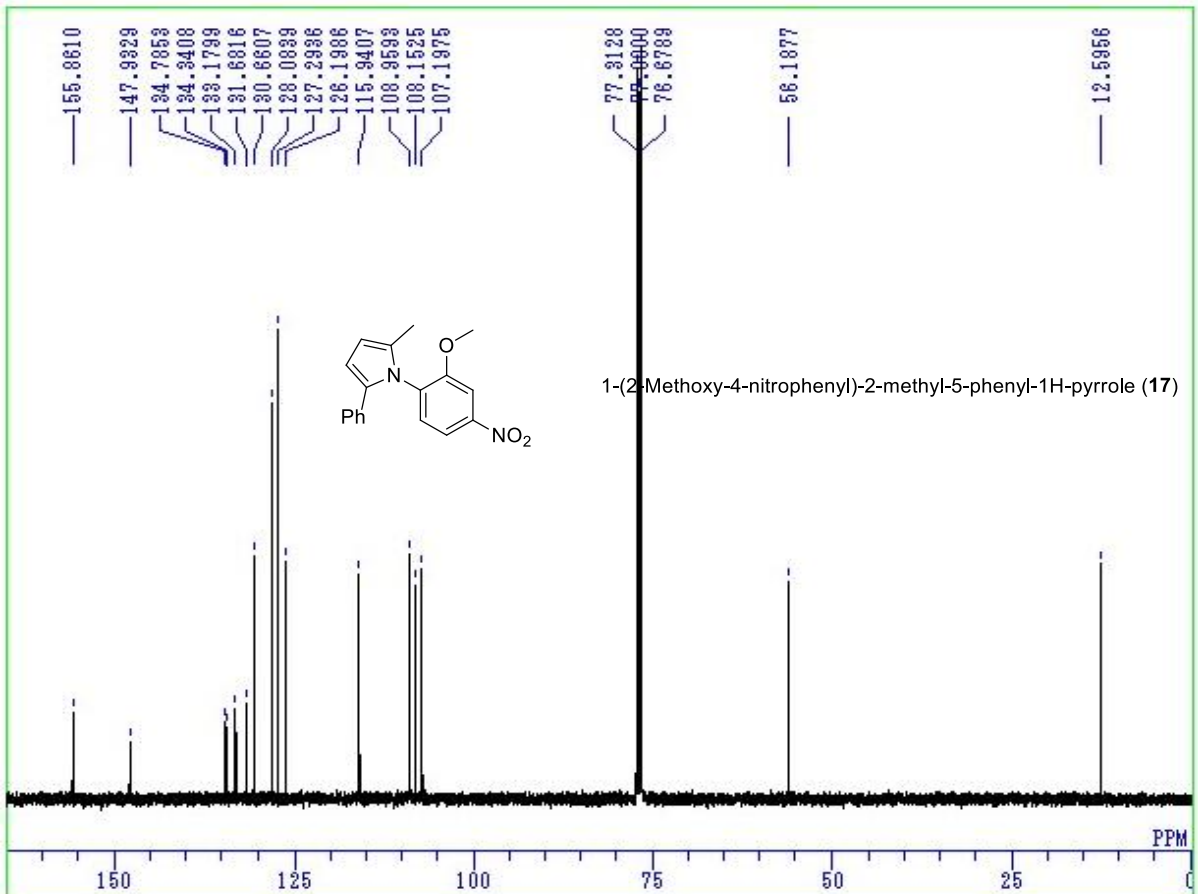

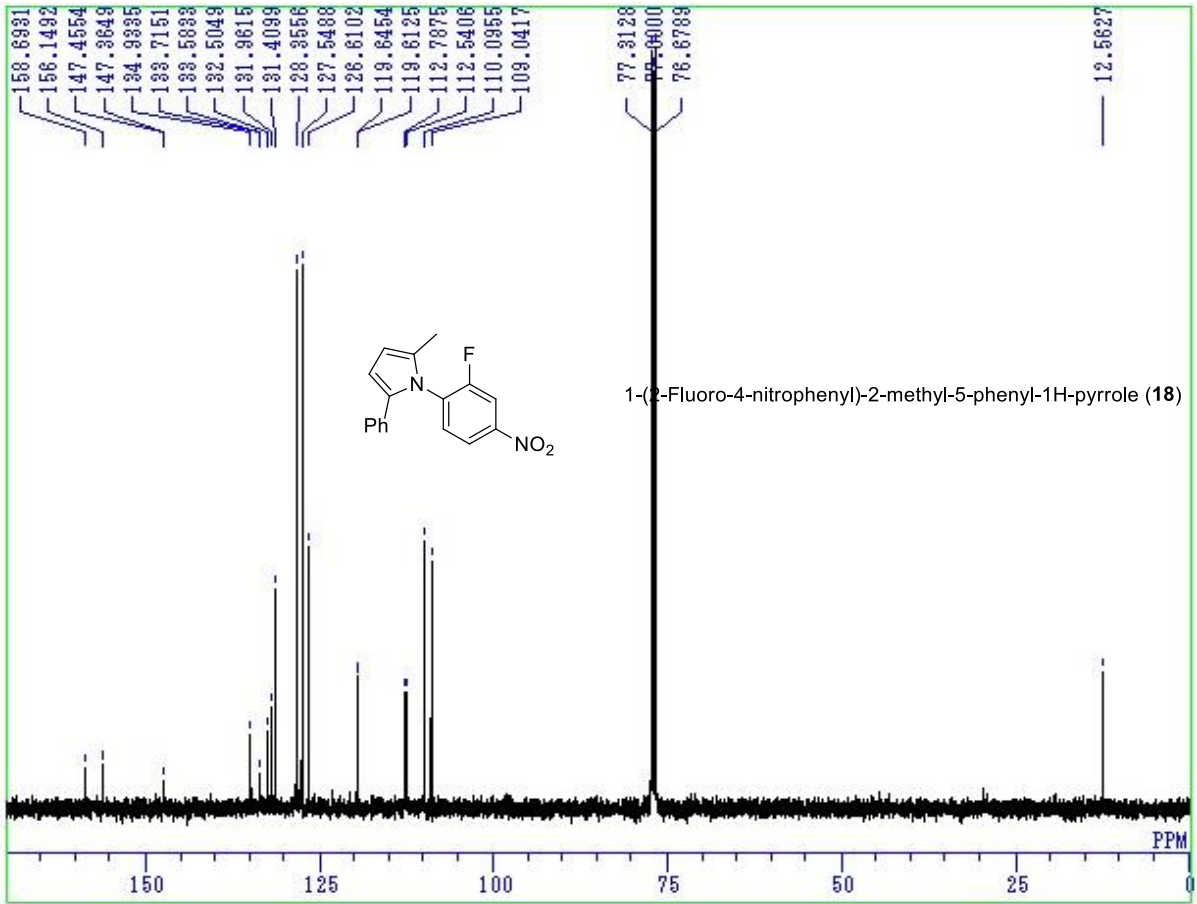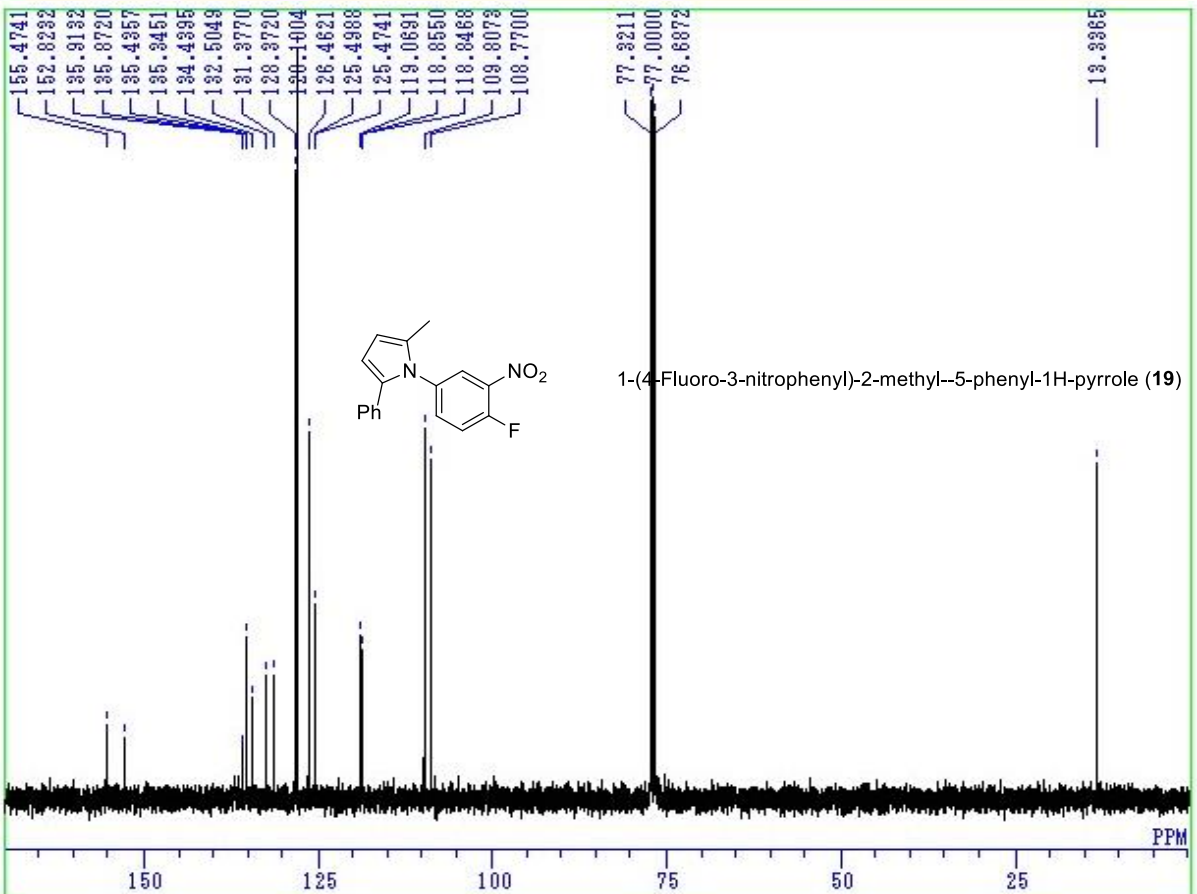

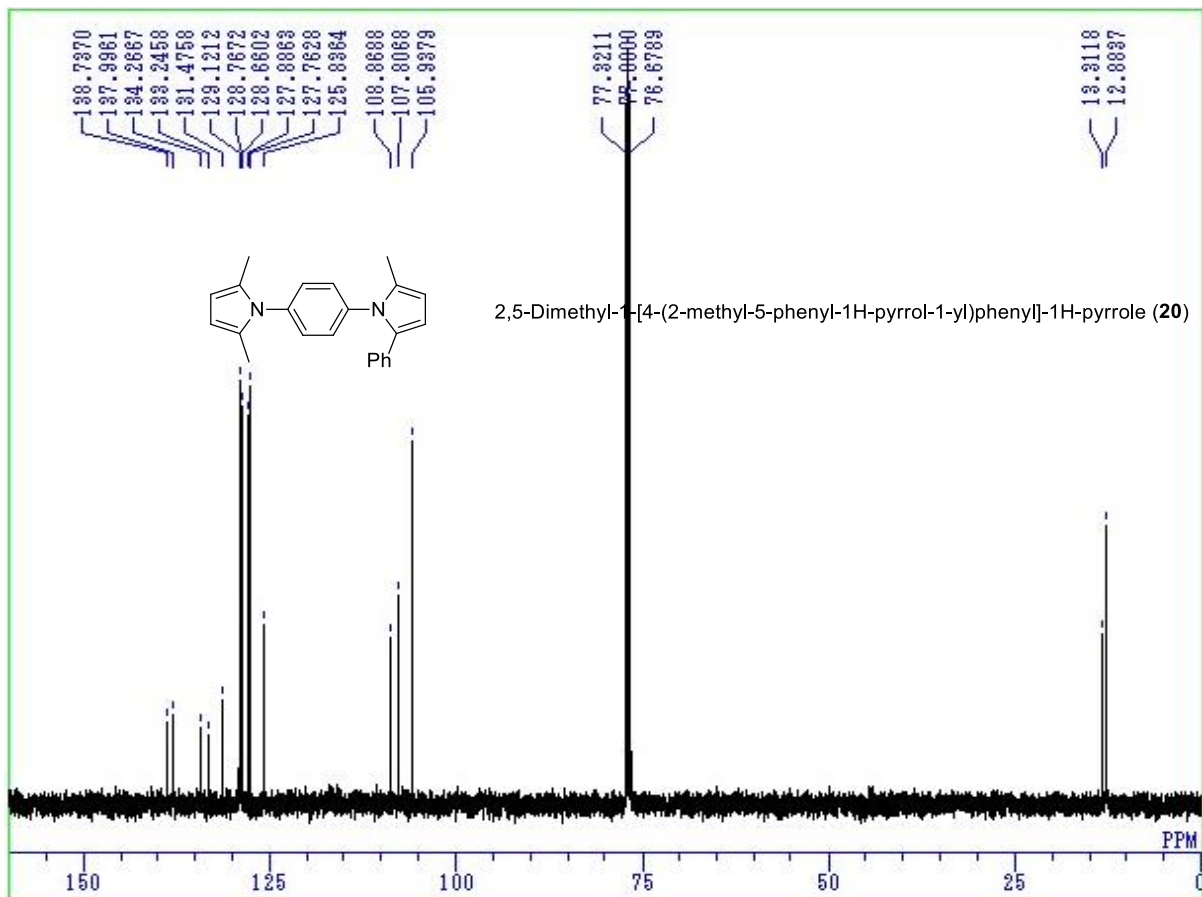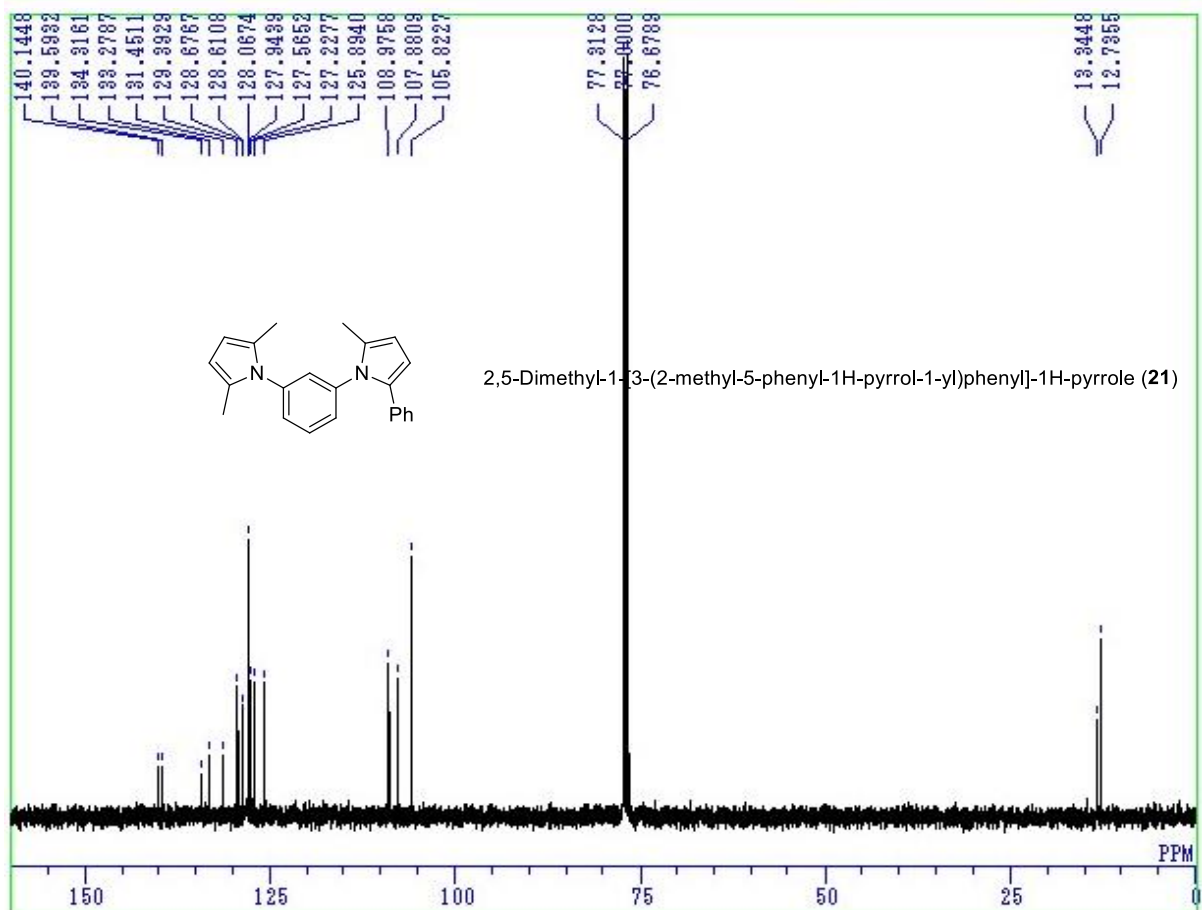

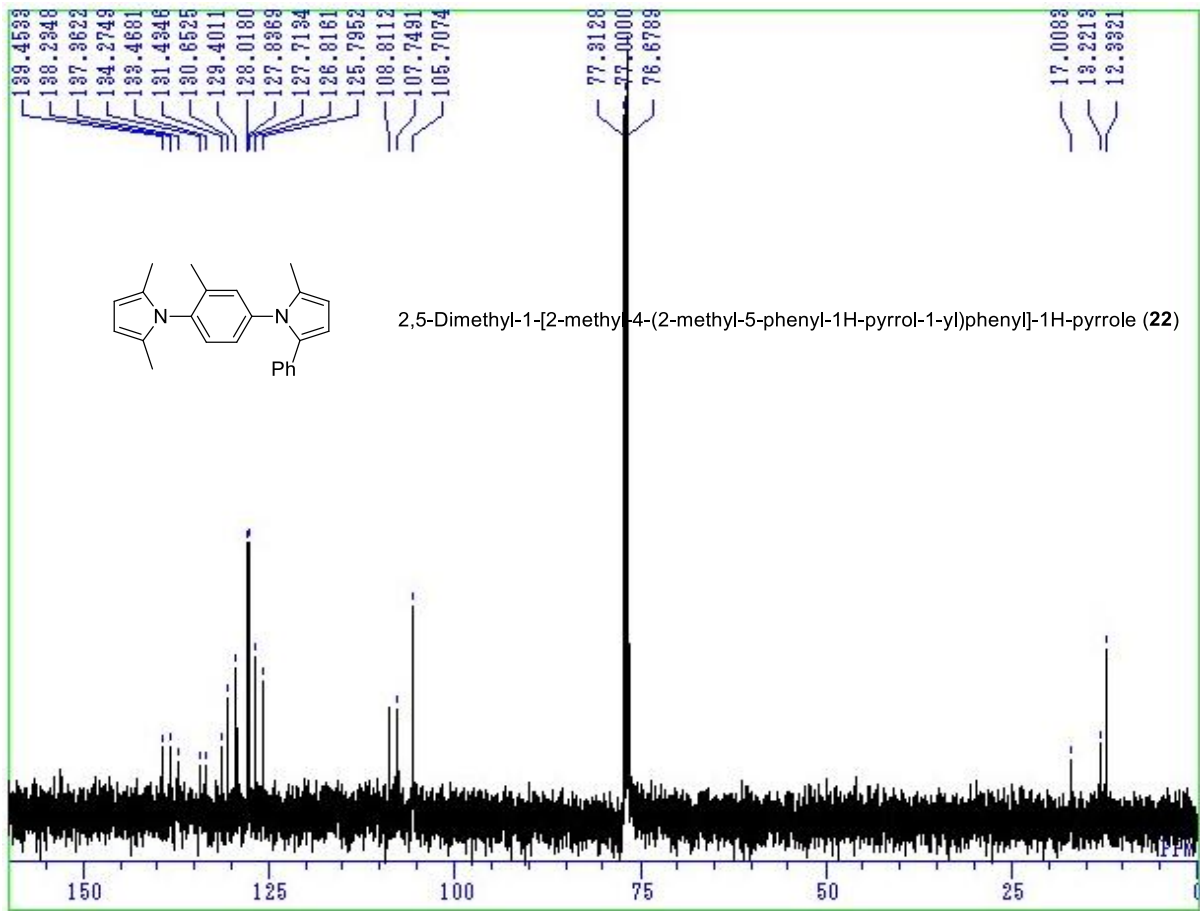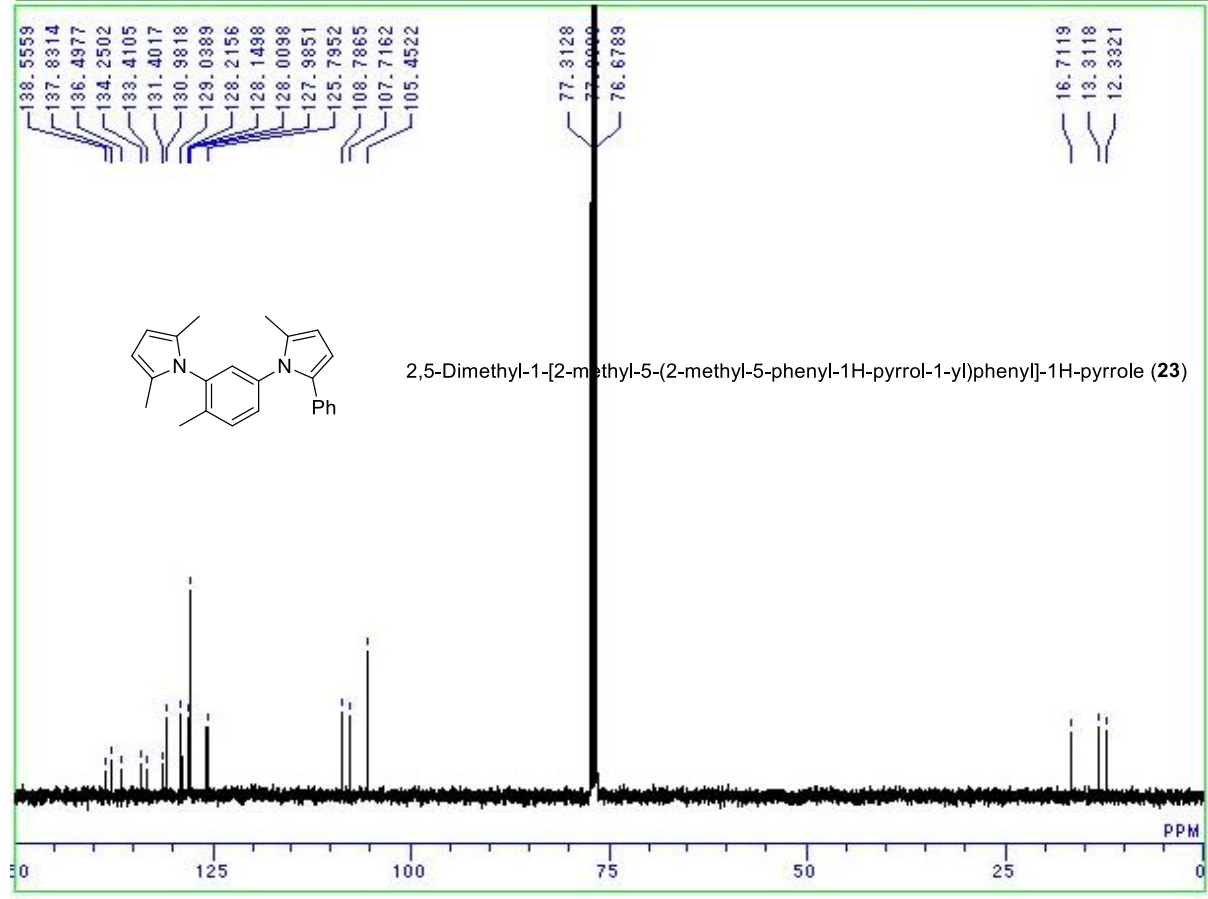

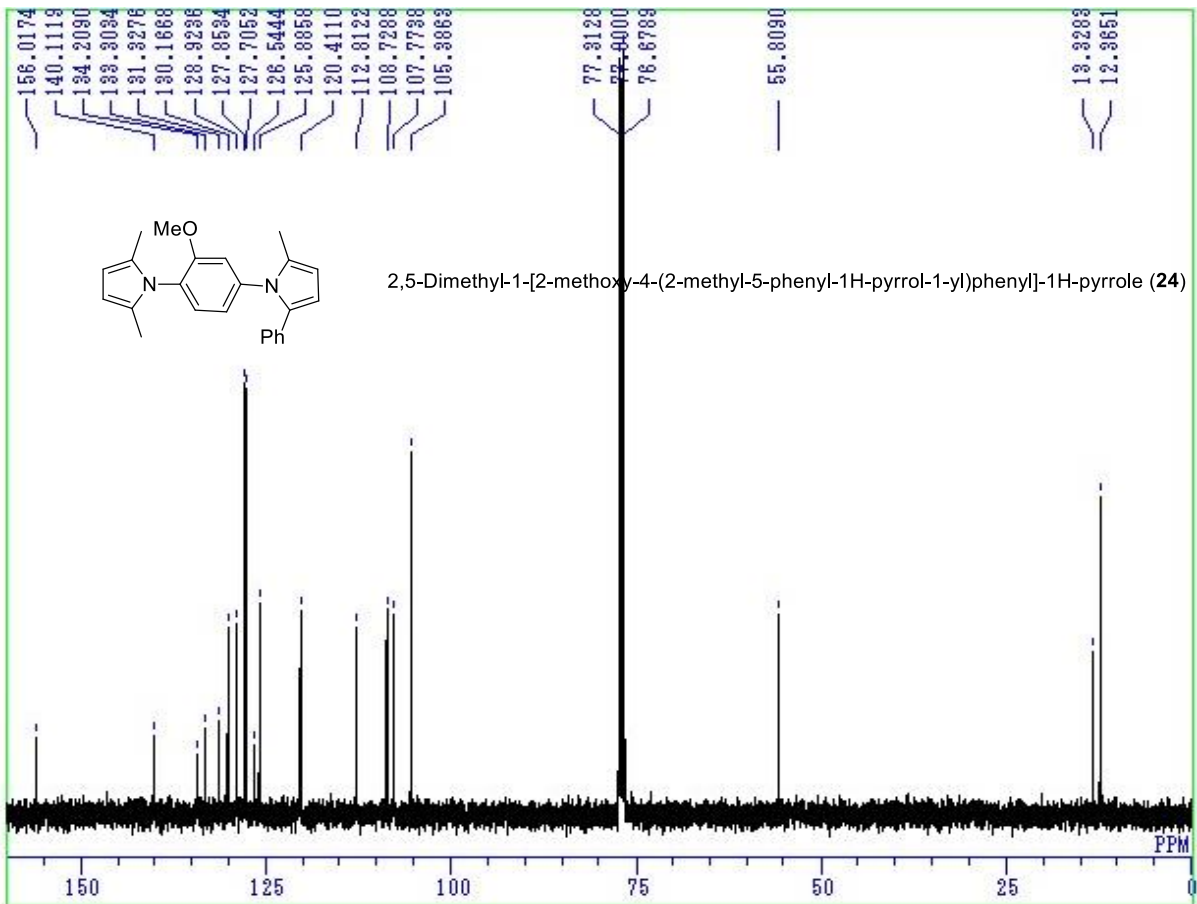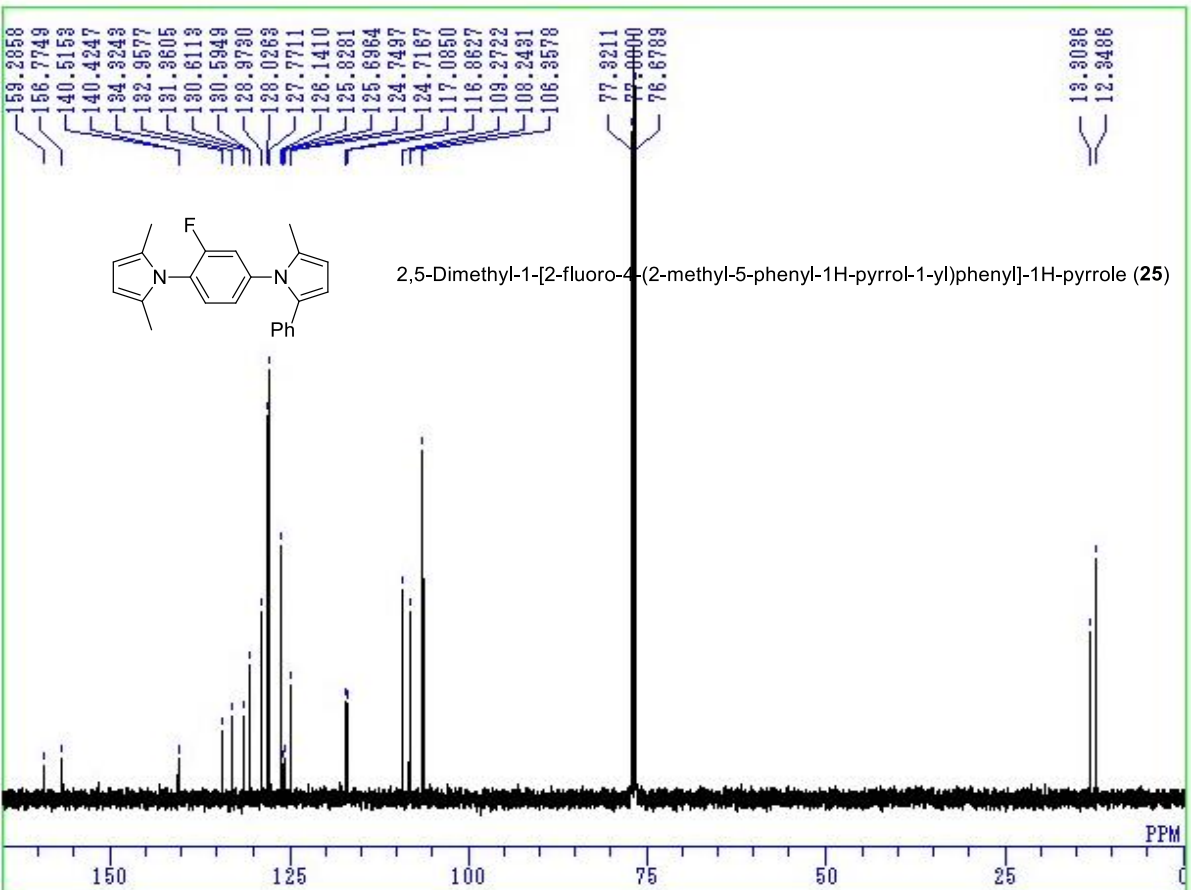

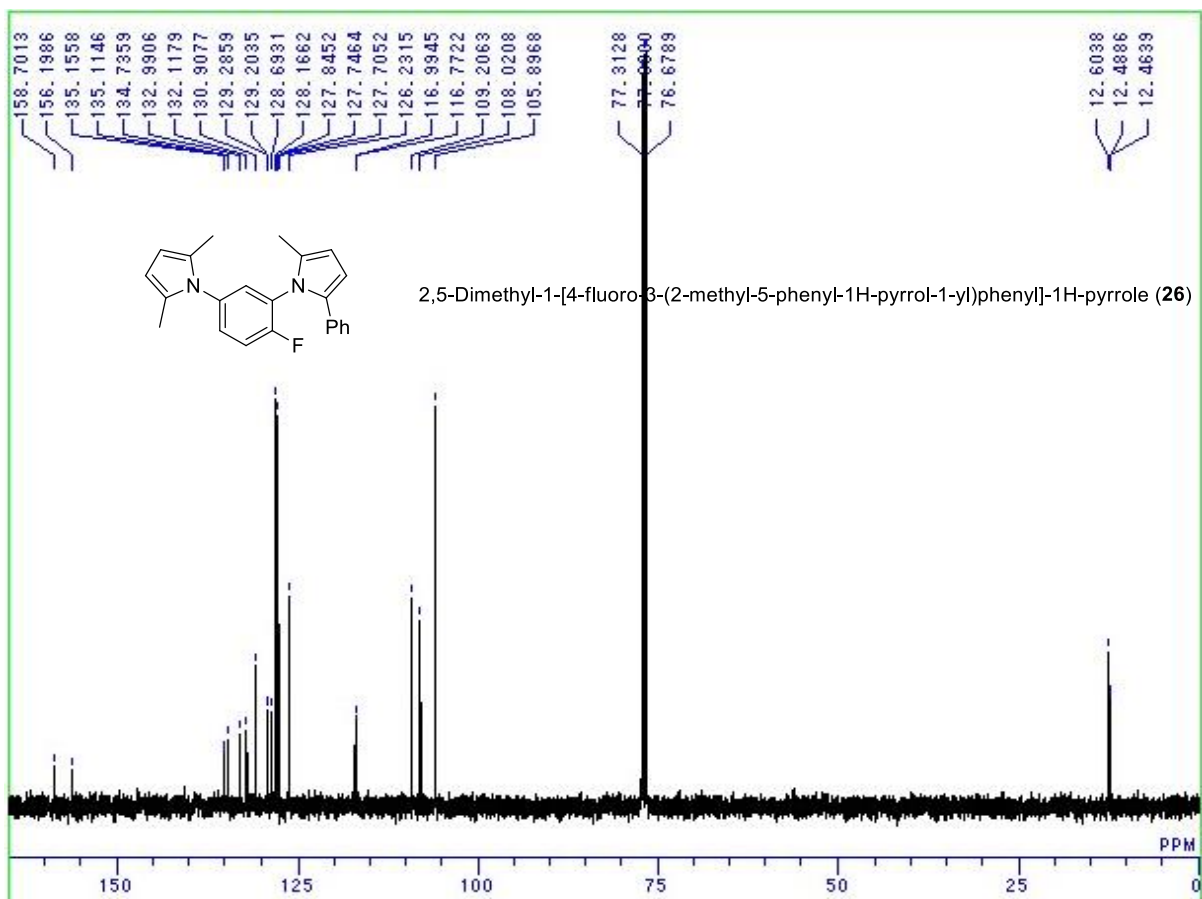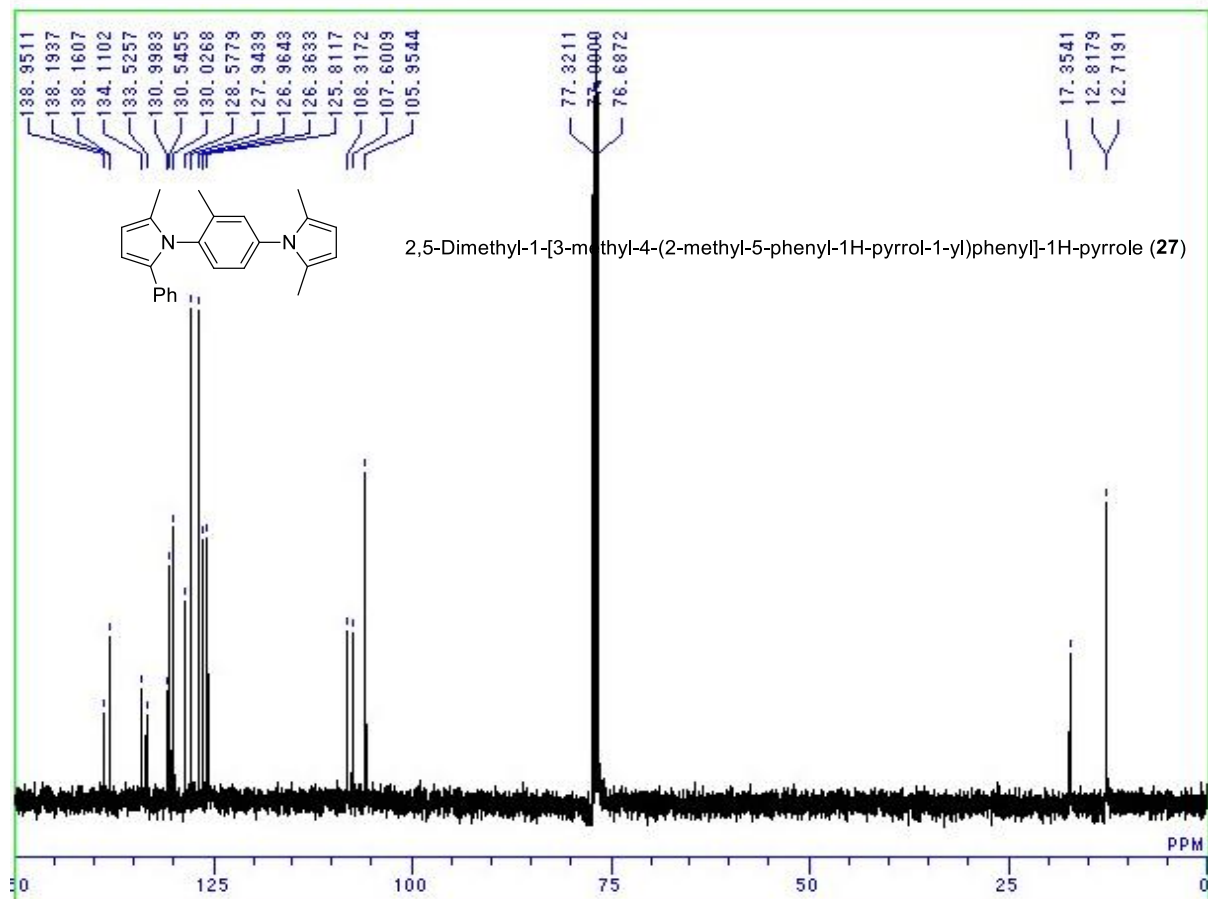



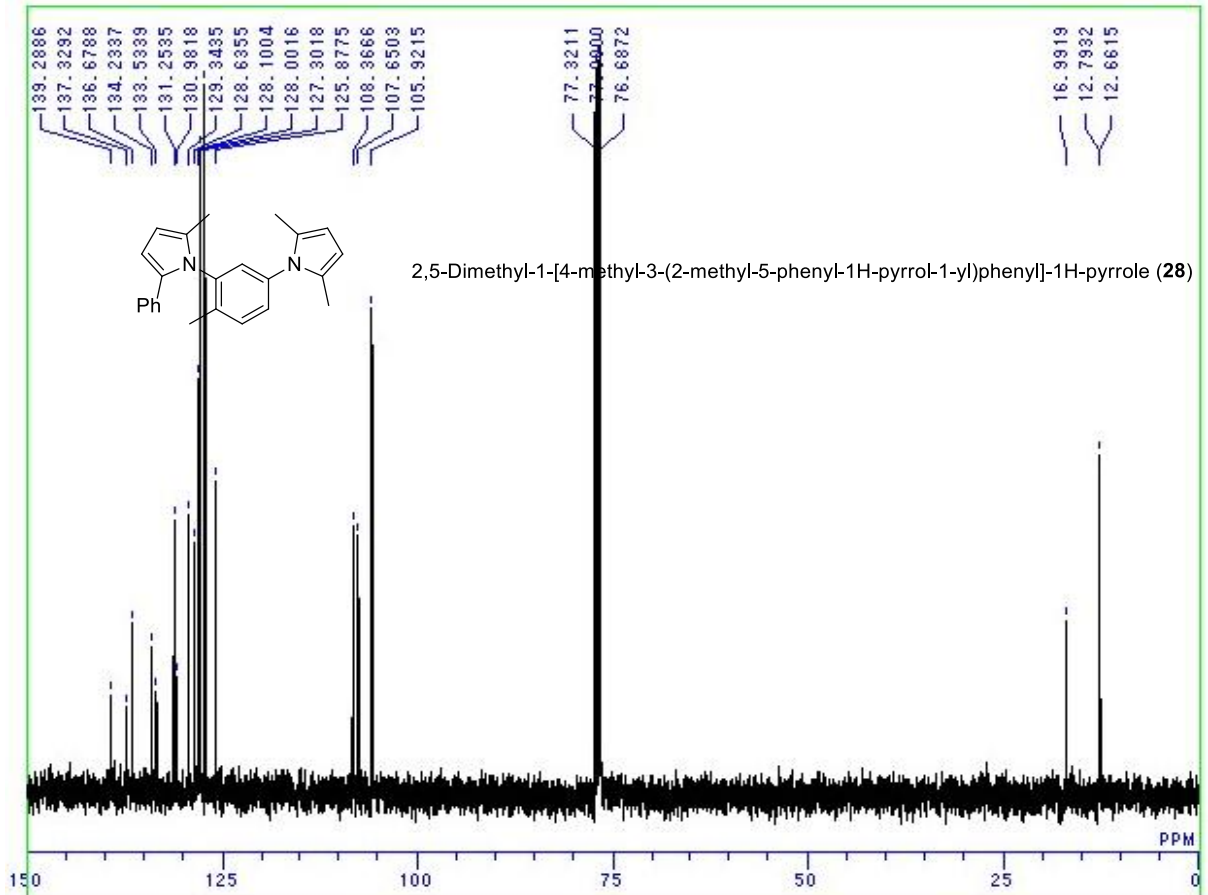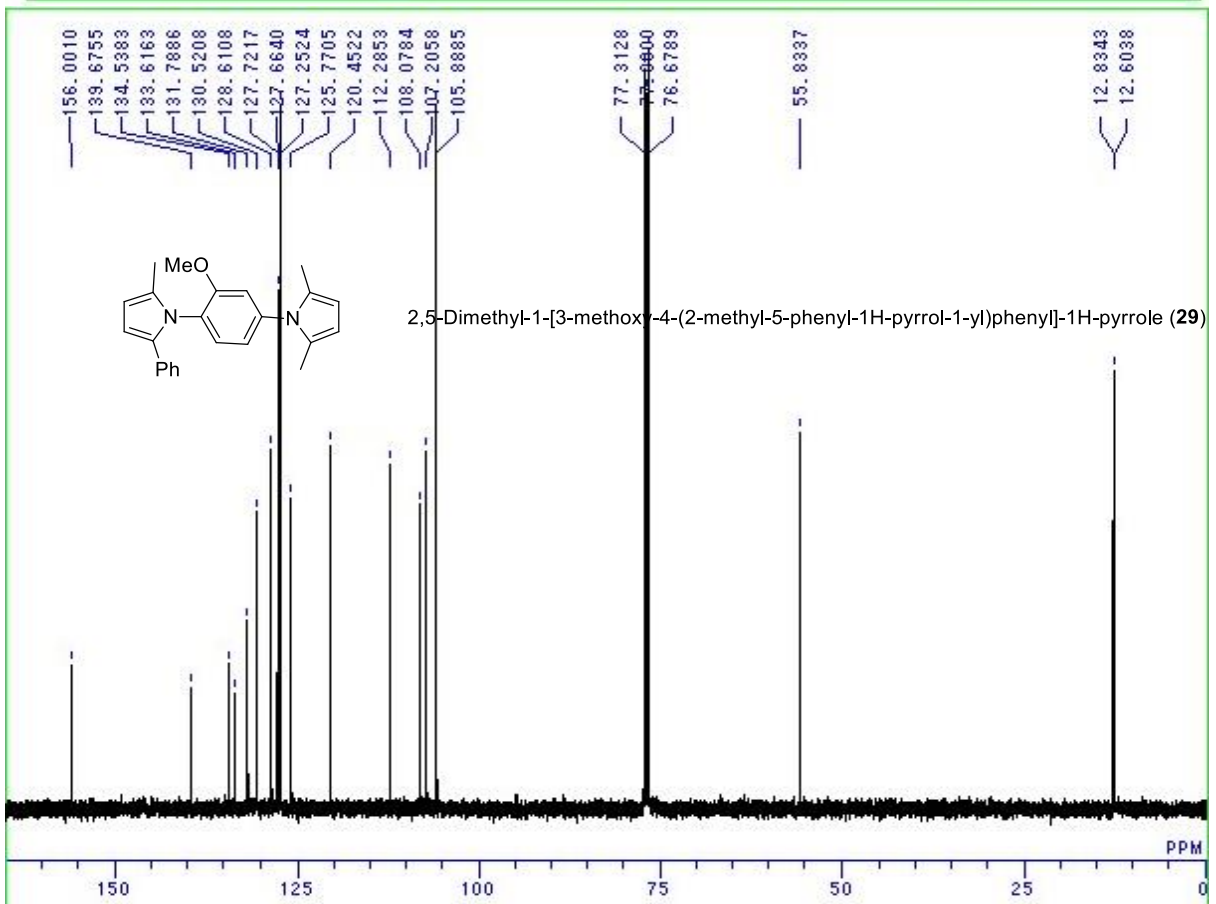

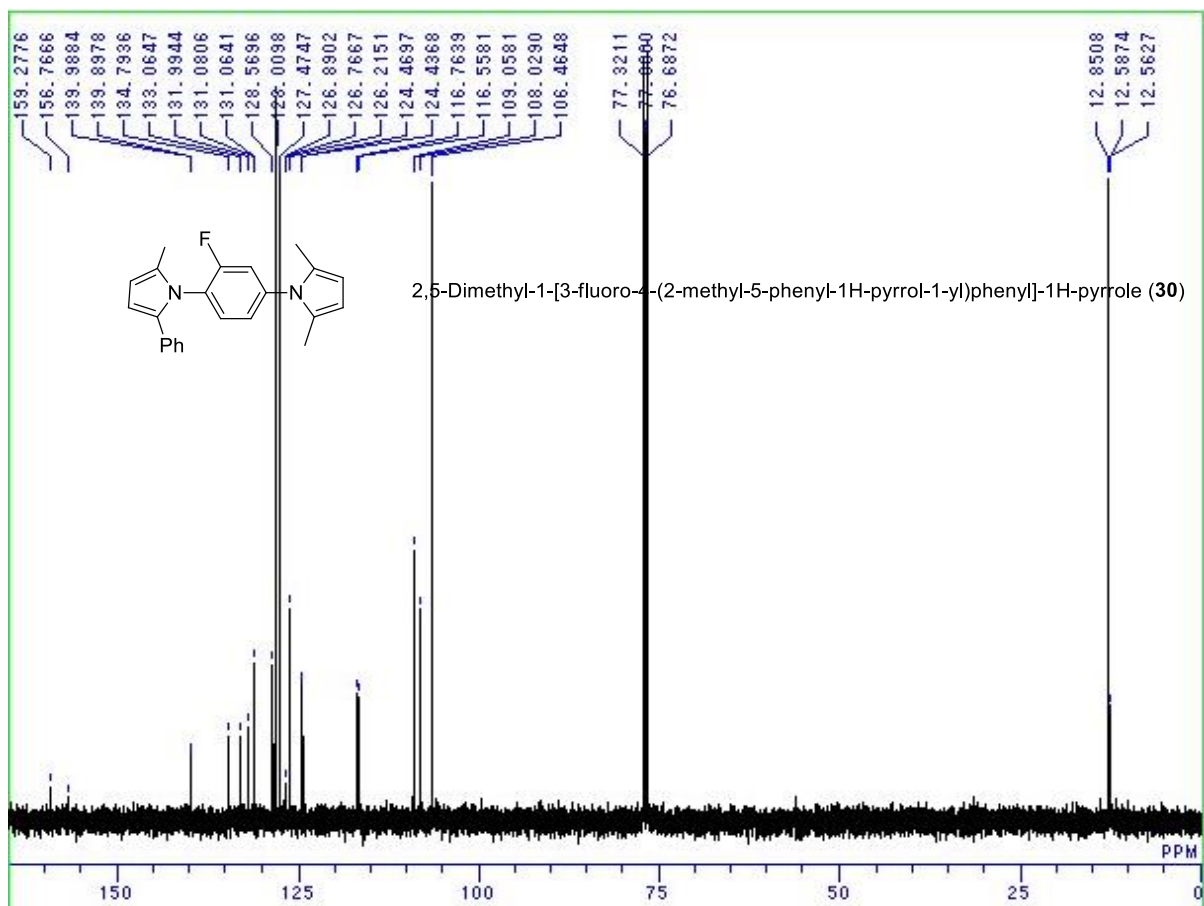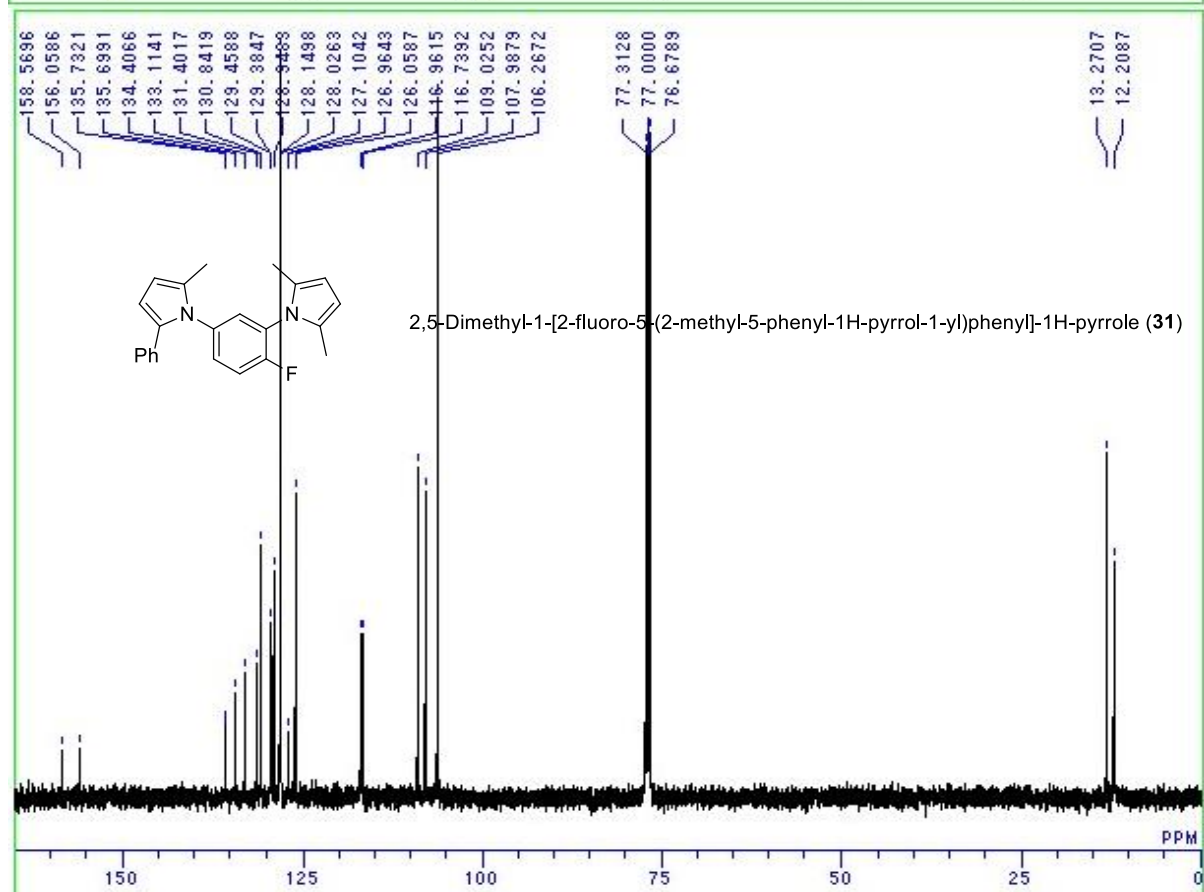

Supplement: c5ob02101d1.pdf [file c5ob02101d1.pdf]
